# Supplementary material for: Genomic analyses identify marker molecules and processes in metastatic breast cancer tissues
Source: Research Square preprint supplement (doi:10.21203/rs.3.rs-1296564/v1), 2022-01-25
Supplement: Supplementary file 1 [file 9d8f8c9a03ec23c4af499464.xlsx]

## Sheet: result Reactome
Pathway identifier	Pathway name	#Entities found	#Entities total	Entities ratio	Entities pValue	Entities FDR	#Reactions found	#Reactions total	Reactions ratio	Species identifier	Species name	Submitted entities found	Mapped entities	Found reaction identifiers
R-HSA-380108	Chemokine receptors bind chemokines	12	57	0.00399411	0.00129026	0.851808	7	19	0.00139943	9606	Homo sapiens	Ccr1;Cxcr1;Cxcr2;Ackr4;Cxcl1;Ccr5;Ccl17;Ccr10;Cxcl5		R-HSA-373813;R-HSA-373061;R-HSA-373073;R-HSA-443986;R-HSA-373791;R-HSA-373086;R-HSA-443978
R-HSA-3238698	WNT ligand biogenesis and trafficking	7	28	0.00196202	0.00517074	0.851808	8	12	0.000883848	9606	Homo sapiens	Wnt2b;Wnt5b;Wnt7a;Wnt2;Wnt4;Wnt10b		R-HSA-3247840;R-HSA-3247843;R-HSA-3238691;R-HSA-3247844;R-HSA-3238694;R-HSA-3781941;R-HSA-3247837;R-HSA-3781943
R-HSA-6783783	Interleukin-10 signaling	14	86	0.00602621	0.00540709	0.851808	3	15	0.00110481	9606	Homo sapiens	Cd86;Ccr1;Cd80;Icam1;Cxcl1;Ccr5;Csf3		R-HSA-8937656;R-HSA-6784160;R-HSA-8937654
R-HSA-2032785	YAP1- and WWTR1 (TAZ)-stimulated gene expression	5	18	0.0012613	0.0112877	0.851808	3	9	0.000662886	9606	Homo sapiens	Ctgf;Gata4;Runx2		R-HSA-1989766;R-HSA-2064932;R-HSA-2032800
R-HSA-9037628	Rhesus blood group biosynthesis	2	4	0.000280289	0.0354728	0.851808	1	2	0.000147308	9606	Homo sapiens	Rhd		R-HSA-9038658
R-HSA-140875	Common Pathway of Fibrin Clot Formation	5	25	0.0017518	0.0387836	0.851808	20	29	0.00213597	9606	Homo sapiens	F9;Serpine2;F13a1;Prtn3;F5		R-HSA-141026;R-HSA-5606996;R-HSA-5607058;R-HSA-5607004;R-HSA-140840;R-HSA-140686;R-HSA-140847;R-HSA-5607002;R-HSA-140851;R-HSA-141040;R-HSA-5604929;R-HSA-140599;R-HSA-5602080;R-HSA-5591040;R-HSA-5591052;R-HSA-140696;R-HSA-140664;R-HSA-9015122;R-HSA-5591086;R-HSA-5603467
R-HSA-9696273	RND1 GTPase cycle	7	43	0.0030131	0.0416704	0.851808	1	2	0.000147308	9606	Homo sapiens	Dsp;Ccdc88b;Tfrc;Fam83b;Pik3r1;Ptpn13;Plxna1		R-HSA-9696271
R-HSA-6798695	Neutrophil degranulation	46	480	0.0336346	0.0432276	0.851808	10	10	0.00073654	9606	Homo sapiens	Ctsc;Ctsd;Adgre5;Mgam;Rab24;Creg1;Cxcr1;Cxcr2;C5ar1;Cotl1;Prtn3;Fpr2;Dnase1l1;Aldoc;Cfp;Dock2;Clec12a;Kcnk2;Dpp7;Pnp;Neu1;Hpse;Mcemp1;Olr1;Tcirg1;Lbp;Atp6v0c;Cxcl1;S100a9;Iqgap2;Oscar;Glipr1;Dsp;Rab31;Pycard;Fcgr3;Mmd;Pygl;Man2b1;Ano6;Sirpa;Dok2;Pkm;Itgb2;Pkp1		R-HSA-6798743;R-HSA-6799350;R-HSA-6798739;R-HSA-6800434;R-HSA-6798751;R-HSA-6798749;R-HSA-6798748;R-HSA-6798747;R-HSA-6800426;R-HSA-6798745
R-HSA-164940	Nef mediated downregulation of MHC class I complex cell surface expression	3	11	0.000770794	0.0483706	0.851808	3	4	0.000294616	9606	Homo sapiens	Ap1m2;Ap1s2		R-HSA-182263;R-HSA-182279;R-HSA-182286
R-HSA-111453	BH3-only proteins associate with and inactivate anti-apoptotic BCL-2 members	3	11	0.000770794	0.0483706	0.851808	3	4	0.000294616	9606	Homo sapiens	Bcl2;Bmf		R-HSA-114352;R-HSA-508163;R-HSA-6790025
R-HSA-189085	Digestion of dietary carbohydrate	5	28	0.00196202	0.0574973	0.851808	4	13	0.000957502	9606	Homo sapiens	Mgam;Amy1		R-HSA-188979;R-HSA-191114;R-HSA-189102;R-HSA-191116
R-HSA-9634638	Estrogen-dependent nuclear events downstream of ESR-membrane signaling	5	29	0.00203209	0.0647055	0.851808	4	12	0.000883848	9606	Homo sapiens	Btc;Epgn;Bcl2;Foxo3		R-HSA-9625465;R-HSA-9624526;R-HSA-9624527;R-HSA-9623999
R-HSA-164952	The role of Nef in HIV-1 replication and disease pathogenesis	5	29	0.00203209	0.0647055	0.851808	4	20	0.00147308	9606	Homo sapiens	Ap1m2;Ap1s2;Elmo1;Dock2		R-HSA-182263;R-HSA-182279;R-HSA-200952;R-HSA-182286
R-HSA-9690406	Transcriptional regulation of testis differentiation	4	21	0.00147152	0.0707108	0.851808	17	18	0.00132577	9606	Homo sapiens	Sox9;Gata4;Wnt4		R-HSA-9692146;R-HSA-9693009;R-HSA-9692241;R-HSA-9690896;R-HSA-9692150;R-HSA-9690395;R-HSA-9692154;R-HSA-9692250;R-HSA-9690877;R-HSA-9692131;R-HSA-9692129;R-HSA-9692135;R-HSA-9692134;R-HSA-9690404;R-HSA-9692228;R-HSA-9692297;R-HSA-9690414
R-HSA-9673218	Defective F9 secretion	1	1	7.00722e-05	0.0707413	0.851808	1	1	7.3654e-05	9606	Homo sapiens	F9		R-HSA-9670888
R-HSA-5669034	TNFs bind their physiological receptors	5	30	0.00210217	0.072396	0.851808	5	13	0.000957502	9606	Homo sapiens	Tnfsf4;Tnfrsf11b;Tnfrsf25;Eda2r;Tnfrsf13b;Tnfrsf19		R-HSA-5693012;R-HSA-5669013;R-HSA-5676607;R-HSA-5692315;R-HSA-5669035
R-HSA-8941333	RUNX2 regulates genes involved in differentiation of myeloid cells	2	6	0.000420433	0.072609	0.851808	2	2	0.000147308	9606	Homo sapiens	Runx2		R-HSA-8938382;R-HSA-8938371
R-HSA-375276	Peptide ligand-binding receptors	21	203	0.0142247	0.0771125	0.851808	18	77	0.00567136	9606	Homo sapiens	Ccr1;Pmch;Cxcr1;C5ar2;Cxcr2;C5ar1;Aplnr;Ackr4;Fpr2;Ccl17;Cort;Ccr10;Pnp;44808;F2rl1;Cxcl1;Ccr5;Cxcl5		R-HSA-373061;R-HSA-374758;R-HSA-374337;R-HSA-964811;R-HSA-375395;R-HSA-391913;R-HSA-443978;R-HSA-373813;R-HSA-388596;R-HSA-389463;R-HSA-373073;R-HSA-443986;R-HSA-947673;R-HSA-388605;R-HSA-373791;R-HSA-388863;R-HSA-373086;R-HSA-374298
R-HSA-391908	Prostanoid ligand receptors	3	14	0.00098101	0.0852663	0.851808	2	8	0.000589232	9606	Homo sapiens	Ptgir;Ptger2		R-HSA-391940;R-HSA-391942
R-HSA-180292	GAB1 signalosome	4	23	0.00161166	0.091158	0.851808	9	11	0.000810194	9606	Homo sapiens	Btc;Epgn;Pik3r1;Pag1		R-HSA-177923;R-HSA-177939;R-HSA-177926;R-HSA-177927;R-HSA-177924;R-HSA-177941;R-HSA-177930;R-HSA-177944;R-HSA-177935
R-HSA-447038	NrCAM interactions	2	7	0.000490505	0.0943068	0.851808	4	4	0.000294616	9606	Homo sapiens	Nrp2;Nrcam		R-HSA-447030;R-HSA-376134;R-HSA-549060;R-HSA-445067
R-HSA-8941284	RUNX2 regulates chondrocyte maturation	2	7	0.000490505	0.0943068	0.851808	4	4	0.000294616	9606	Homo sapiens	Runx2		R-HSA-8878257;R-HSA-8878266;R-HSA-9008326;R-HSA-8986294
R-HSA-174577	Activation of C3 and C5	2	7	0.000490505	0.0943068	0.851808	3	3	0.000220962	9606	Homo sapiens	C4b;Cfp		R-HSA-173680;R-HSA-166817;R-HSA-173636
R-HSA-3772470	Negative regulation of TCF-dependent signaling by WNT ligand antagonists	3	15	0.00105108	0.0995858	0.851808	4	5	0.00036827	9606	Homo sapiens	Sfrp2;Wnt4;Dkk2		R-HSA-3769401;R-HSA-3772441;R-HSA-3769370;R-HSA-5368586
R-HSA-140877	Formation of Fibrin Clot (Clotting Cascade)	6	43	0.0030131	0.100004	0.851808	28	61	0.00449289	9606	Homo sapiens	F9;Serpine2;F13a1;Prtn3;F5		R-HSA-5606996;R-HSA-9670673;R-HSA-158278;R-HSA-5607058;R-HSA-5607004;R-HSA-140686;R-HSA-5607002;R-HSA-158419;R-HSA-5604929;R-HSA-5591040;R-HSA-140823;R-HSA-158164;R-HSA-5591052;R-HSA-140696;R-HSA-9015122;R-HSA-5603467;R-HSA-141026;R-HSA-140840;R-HSA-140847;R-HSA-140851;R-HSA-141040;R-HSA-140599;R-HSA-5602080;R-HSA-140664;R-HSA-5607023;R-HSA-158137;R-HSA-5591086;R-HSA-158333
R-HSA-216083	Integrin cell surface interactions	10	86	0.00602621	0.106223	0.851808	25	55	0.00405097	9606	Homo sapiens	Itga10;Vcam1;Col23a1;Itga4;Itgb2;Col24a1;Icam1;Itgb7;Col8a2;Itga6		R-HSA-2473511;R-HSA-114563;R-HSA-216069;R-HSA-4539779;R-HSA-2467436;R-HSA-199050;R-HSA-265422;R-HSA-265428;R-HSA-204434;R-HSA-216082;R-HSA-265429;R-HSA-202706;R-HSA-202704;R-HSA-4084903;R-HSA-202718;R-HSA-198941;R-HSA-2752118;R-HSA-202727;R-HSA-216043;R-HSA-216040;R-HSA-2327695;R-HSA-9679740;R-HSA-4086223;R-HSA-216050;R-HSA-199032
R-HSA-1679131	Trafficking and processing of endosomal TLR	3	16	0.00112115	0.114793	0.851808	6	7	0.000515578	9606	Homo sapiens	Unc93b1;Tlr8;Tlr7		R-HSA-1678921;R-HSA-1678920;R-HSA-1678923;R-HSA-1678927;R-HSA-1678944;R-HSA-1678998
R-HSA-373080	Class B/2 (Secretin family receptors)	11	99	0.00693715	0.117498	0.851808	6	20	0.00147308	9606	Homo sapiens	Vipr2;Wnt2b;Vipr1;Gngt2;Adgre5;Wnt7a;Wnt2;Pthlh;Wnt4;Wnt10b		R-HSA-444773;R-HSA-879674;R-HSA-381612;R-HSA-201708;R-HSA-420233;R-HSA-420489
R-HSA-167826	The fatty acid cycling model	2	8	0.000560577	0.117577	0.851808	3	6	0.000441924	9606	Homo sapiens	Ucp2;Slc25a14		R-HSA-166387;R-HSA-166214;R-HSA-166220
R-HSA-5638303	Inhibition of Signaling by Overexpressed EGFR	2	8	0.000560577	0.117577	0.851808	1	2	0.000147308	9606	Homo sapiens	Btc;Epgn		R-HSA-1225978
R-HSA-5638302	Signaling by Overexpressed Wild-Type EGFR in Cancer	2	8	0.000560577	0.117577	0.851808	1	2	0.000147308	9606	Homo sapiens	Btc;Epgn		R-HSA-1225978
R-HSA-389359	CD28 dependent Vav1 pathway	3	17	0.00119123	0.130809	0.851808	6	6	0.000441924	9606	Homo sapiens	Cd86;Cd80;Pak3		R-HSA-389348;R-HSA-389350;R-HSA-389788;R-HSA-388814;R-HSA-389352;R-HSA-389354
R-HSA-5657655	MGMT-mediated DNA damage reversal	1	2	0.000140144	0.136483	0.851808	2	2	0.000147308	9606	Homo sapiens	Mgmt		R-HSA-73892;R-HSA-5657651
R-HSA-5579031	Defective ACTH causes obesity and POMCD	1	2	0.000140144	0.136483	0.851808	1	1	7.3654e-05	9606	Homo sapiens	44808		R-HSA-5603251
R-HSA-5579032	Defective TBXAS1 causes GHDD	1	2	0.000140144	0.136483	0.851808	1	1	7.3654e-05	9606	Homo sapiens	Tbxas1		R-HSA-5603275
R-HSA-3359454	Defective TCN2 causes TCN2 deficiency	1	2	0.000140144	0.136483	0.851808	1	1	7.3654e-05	9606	Homo sapiens	Tcn2		R-HSA-3299657
R-HSA-5602415	UNC93B1 deficiency - HSE	1	2	0.000140144	0.136483	0.851808	1	1	7.3654e-05	9606	Homo sapiens	Unc93b1		R-HSA-5607838
R-HSA-196108	Pregnenolone biosynthesis	4	27	0.00189195	0.139269	0.851808	6	9	0.000662886	9606	Homo sapiens	Stard4;Star;Rbp1;Fdxr;Tmem221		R-HSA-8951850;R-HSA-196086;R-HSA-193065;R-HSA-196126;R-HSA-193054;R-HSA-193101
R-HSA-5627123	RHO GTPases activate PAKs	4	27	0.00189195	0.139269	0.851808	9	15	0.00110481	9606	Homo sapiens	Speg;Myh14;Pak3;Ppp1r12b;Mylk		R-HSA-5668932;R-HSA-445797;R-HSA-5668978;R-HSA-5668947;R-HSA-419232;R-HSA-442832;R-HSA-5627775;R-HSA-5668984;R-HSA-8981926
R-HSA-174403	Glutathione synthesis and recycling	4	27	0.00189195	0.139269	0.851808	3	9	0.000662886	9606	Homo sapiens	Chac1;Ggt1;Oplah		R-HSA-8943279;R-HSA-1247935;R-HSA-6785928
R-HSA-8964026	Chylomicron clearance	2	9	0.00063065	0.142089	0.851808	4	4	0.000294616	9606	Homo sapiens	Lipc;Ldlr		R-HSA-174706;R-HSA-174624;R-HSA-174657;R-HSA-174808
R-HSA-8951671	RUNX3 regulates YAP1-mediated transcription	2	9	0.00063065	0.142089	0.851808	2	3	0.000220962	9606	Homo sapiens	Ctgf		R-HSA-8951695;R-HSA-1989766
R-HSA-8874211	CREB3 factors activate genes	2	9	0.00063065	0.142089	0.851808	5	21	0.00154673	9606	Homo sapiens	Dcstamp;Creb3l2		R-HSA-8874198;R-HSA-8874191;R-HSA-8874205;R-HSA-8874187;R-HSA-8874200
R-HSA-159763	Transport of gamma-carboxylated protein precursors from the endoplasmic reticulum to the Golgi apparatus	2	9	0.00063065	0.142089	0.851808	2	9	0.000662886	9606	Homo sapiens	F9		R-HSA-159762;R-HSA-159836
R-HSA-164944	Nef and signal transduction	2	9	0.00063065	0.142089	0.851808	1	5	0.00036827	9606	Homo sapiens	Elmo1;Dock2		R-HSA-200952
R-HSA-6785807	Interleukin-4 and Interleukin-13 signaling	20	211	0.0147852	0.151594	0.851808	18	47	0.00346174	9606	Homo sapiens	Lama5;Vcam1;Csf2rb;44808;Itgb2;Icam1;Bcl2;F13a1;Lbp;Pik3r1;Foxo3		R-HSA-6785895;R-HSA-6793958;R-HSA-6790022;R-HSA-6786114;R-HSA-6786050;R-HSA-6789615;R-HSA-6786092;R-HSA-6785898;R-HSA-6786058;R-HSA-6790025;R-HSA-6786070;R-HSA-6786101;R-HSA-6790036;R-HSA-6786096;R-HSA-6786110;R-HSA-6785821;R-HSA-6788346;R-HSA-6790041
R-HSA-77387	Insulin receptor recycling	4	28	0.00196202	0.152621	0.851808	2	6	0.000441924	9606	Homo sapiens	Tcirg1;Atp6v0c;Atp6v0d2;Atp6v0e2		R-HSA-74723;R-HSA-5252133
R-HSA-917977	Transferrin endocytosis and recycling	5	39	0.00273281	0.161738	0.851808	8	11	0.000810194	9606	Homo sapiens	Tfrc;Tcirg1;Atp6v0c;Atp6v0d2;Atp6v0e2		R-HSA-917839;R-HSA-917807;R-HSA-5691154;R-HSA-5252133;R-HSA-917835;R-HSA-917814;R-HSA-917987;R-HSA-917841
R-HSA-2892245	POU5F1 (OCT4), SOX2, NANOG repress genes related to differentiation	2	10	0.000700722	0.167551	0.851808	7	7	0.000515578	9606	Homo sapiens	Tsc22d1;Pou5f1		R-HSA-2972952;R-HSA-2972965;R-HSA-2972949;R-HSA-2972948;R-HSA-2972966;R-HSA-2972977;R-HSA-2972979
R-HSA-1912399	Pre-NOTCH Processing in the Endoplasmic Reticulum	2	10	0.000700722	0.167551	0.851808	2	2	0.000147308	9606	Homo sapiens	Notch3;Pofut1		R-HSA-1912349;R-HSA-1912353
R-HSA-210455	Astrocytic Glutamate-Glutamine Uptake And Metabolism	2	10	0.000700722	0.167551	0.851808	2	3	0.000220962	9606	Homo sapiens	Nat2;Glul		R-HSA-212614;R-HSA-70606
R-HSA-112313	Neurotransmitter uptake and metabolism In glial cells	2	10	0.000700722	0.167551	0.851808	2	3	0.000220962	9606	Homo sapiens	Nat2;Glul		R-HSA-212614;R-HSA-70606
R-HSA-8949275	RUNX3 Regulates Immune Response and Cell Migration	2	10	0.000700722	0.167551	0.851808	2	5	0.00036827	9606	Homo sapiens	Itga4		R-HSA-8949343;R-HSA-8949335
R-HSA-159782	Removal of aminoterminal propeptides from gamma-carboxylated proteins	2	10	0.000700722	0.167551	0.851808	2	9	0.000662886	9606	Homo sapiens	F9		R-HSA-159796;R-HSA-159771
R-HSA-446107	Type I hemidesmosome assembly	2	11	0.000770794	0.193707	0.851808	6	6	0.000441924	9606	Homo sapiens	Itgb4;Itga6		R-HSA-446083;R-HSA-432956;R-HSA-446077;R-HSA-432909;R-HSA-432952;R-HSA-446089
R-HSA-212718	EGFR interacts with phospholipase C-gamma	2	11	0.000770794	0.193707	0.851808	3	3	0.000220962	9606	Homo sapiens	Btc;Epgn		R-HSA-212706;R-HSA-212710;R-HSA-212713
R-HSA-167827	The proton buffering model	2	11	0.000770794	0.193707	0.851808	1	1	7.3654e-05	9606	Homo sapiens	Ucp2;Slc25a14		R-HSA-170026
R-HSA-8866904	Negative regulation of activity of TFAP2 (AP-2) family transcription factors	2	11	0.000770794	0.193707	0.851808	2	6	0.000441924	9606	Homo sapiens	Wwox;Kctd1		R-HSA-8864343;R-HSA-8864569
R-HSA-351906	Apoptotic cleavage of cell adhesion proteins	2	11	0.000770794	0.193707	0.851808	2	10	0.00073654	9606	Homo sapiens	Dsp;Pkp1		R-HSA-201636;R-HSA-201595
R-HSA-8939246	RUNX1 regulates transcription of genes involved in differentiation of myeloid cells	2	11	0.000770794	0.193707	0.851808	1	7	0.000515578	9606	Homo sapiens	Runx2		R-HSA-8938382
R-HSA-5578775	Ion homeostasis	7	64	0.00448462	0.194369	0.851808	10	16	0.00117846	9606	Homo sapiens	Ccr1;Fxyd3;Trpc1;Atp1b2;Atp2b4;Atp1a3;Itpr3		R-HSA-169683;R-HSA-418309;R-HSA-9684068;R-HSA-5226904;R-HSA-2089943;R-HSA-5617182;R-HSA-139854;R-HSA-5617179;R-HSA-5617178;R-HSA-936897
R-HSA-3000157	Laminin interactions	4	31	0.00217224	0.195296	0.851808	12	15	0.00110481	9606	Homo sapiens	Lama5;Lama1;Itgb4;Itga6		R-HSA-216051;R-HSA-2426676;R-HSA-2328145;R-HSA-216048;R-HSA-4084507;R-HSA-3907292;R-HSA-2426530;R-HSA-4084505;R-HSA-2426450;R-HSA-2396083;R-HSA-2327803;R-HSA-216058
R-HSA-166020	Transfer of LPS from LBP carrier to CD14	1	3	0.000210217	0.197577	0.851808	2	2	0.000147308	9606	Homo sapiens	Lbp		R-HSA-166038;R-HSA-169719
R-HSA-205017	NFG and proNGF binds to p75NTR	1	3	0.000210217	0.197577	0.851808	2	2	0.000147308	9606	Homo sapiens	Ngfr		R-HSA-193653;R-HSA-193642
R-HSA-3359485	Defective CD320 causes MMATC	1	3	0.000210217	0.197577	0.851808	1	1	7.3654e-05	9606	Homo sapiens	Tcn2		R-HSA-3325546
R-HSA-3315487	SMAD2/3 MH2 Domain Mutants in Cancer	1	3	0.000210217	0.197577	0.851808	1	1	7.3654e-05	9606	Homo sapiens	Smad2		R-HSA-3315483
R-HSA-5083628	Defective POMGNT1 causes MDDGA3, MDDGB3 and MDDGC3	1	3	0.000210217	0.197577	0.851808	1	1	7.3654e-05	9606	Homo sapiens	Dag1		R-HSA-5617096
R-HSA-5579022	Defective GGT1 causes GLUTH	1	3	0.000210217	0.197577	0.851808	1	1	7.3654e-05	9606	Homo sapiens	Ggt1		R-HSA-9035966
R-HSA-8942233	Intestinal infectious diseases	1	3	0.000210217	0.197577	0.851808	1	1	7.3654e-05	9606	Homo sapiens	Star		R-HSA-8936356
R-HSA-3304347	Loss of Function of SMAD4 in Cancer	1	3	0.000210217	0.197577	0.851808	1	1	7.3654e-05	9606	Homo sapiens	Smad2		R-HSA-3311014
R-HSA-975574	Reactions specific to the hybrid N-glycan synthesis pathway	1	3	0.000210217	0.197577	0.851808	1	1	7.3654e-05	9606	Homo sapiens	Mgat3		R-HSA-975926
R-HSA-5619076	Defective SLC17A8 causes autosomal dominant deafness 25 (DFNA25)	1	3	0.000210217	0.197577	0.851808	1	1	7.3654e-05	9606	Homo sapiens	Slc17a8		R-HSA-5624256
R-HSA-3311021	SMAD4 MH2 Domain Mutants in Cancer	1	3	0.000210217	0.197577	0.851808	1	1	7.3654e-05	9606	Homo sapiens	Smad2		R-HSA-3311014
R-HSA-3359471	Defective MMAB causes MMA, cblB type	1	3	0.000210217	0.197577	0.851808	1	1	7.3654e-05	9606	Homo sapiens	Mmab		R-HSA-3322125
R-HSA-432030	Transport of glycerol from adipocytes to the liver by Aquaporins	1	3	0.000210217	0.197577	0.851808	1	2	0.000147308	9606	Homo sapiens	Aqp3		R-HSA-432074
R-HSA-432047	Passive transport by Aquaporins	3	21	0.00147152	0.201345	0.851808	4	8	0.000589232	9606	Homo sapiens	Aqp3;Aqp1		R-HSA-507871;R-HSA-507870;R-HSA-507869;R-HSA-507868
R-HSA-9696264	RND3 GTPase cycle	5	43	0.0030131	0.211145	0.851808	1	2	0.000147308	9606	Homo sapiens	Dsp;Ccdc88b;Fam83b;Pik3r1;Ptpn13		R-HSA-9696268
R-HSA-9013408	RHOG GTPase cycle	8	78	0.00546563	0.218323	0.851808	4	6	0.000441924	9606	Homo sapiens	Arhgef16;Tfrc;Ophn1;Vrk2;Pik3r1;Dock2;Iqgap2;Pak4		R-HSA-9014433;R-HSA-9014449;R-HSA-9014467;R-HSA-9014434
R-HSA-1963642	PI3K events in ERBB2 signaling	3	22	0.00154159	0.220199	0.851808	6	7	0.000515578	9606	Homo sapiens	Btc;Erbb3;Pik3r1		R-HSA-1306979;R-HSA-1306965;R-HSA-1250346;R-HSA-1250462;R-HSA-1250189;R-HSA-1306957
R-HSA-164938	Nef-mediates down modulation of cell surface receptors by recruiting them to clathrin adapters	3	22	0.00154159	0.220199	0.851808	3	15	0.00110481	9606	Homo sapiens	Ap1m2;Ap1s2		R-HSA-182263;R-HSA-182279;R-HSA-182286
R-HSA-5625970	RHO GTPases activate KTN1	2	12	0.000840866	0.220331	0.851808	1	2	0.000147308	9606	Homo sapiens	Klc3		R-HSA-5672083
R-HSA-3928663	EPHA-mediated growth cone collapse	4	33	0.00231238	0.22555	0.851808	4	4	0.000294616	9606	Homo sapiens	Efna2;Myh14;Epha3;Ngef		R-HSA-3928651;R-HSA-3928602;R-HSA-3928616;R-HSA-3928648
R-HSA-452723	Transcriptional regulation of pluripotent stem cells	5	45	0.00315325	0.237473	0.851808	33	35	0.00257789	9606	Homo sapiens	Smad2;Tsc22d1;Pou5f1		R-HSA-2972975;R-HSA-480515;R-HSA-2972965;R-HSA-452750;R-HSA-2972964;R-HSA-500366;R-HSA-2972967;R-HSA-480204;R-HSA-2972966;R-HSA-2972960;R-HSA-2895778;R-HSA-480520;R-HSA-2972962;R-HSA-480470;R-HSA-452894;R-HSA-452958;R-HSA-452701;R-HSA-2972977;R-HSA-2972979;R-HSA-2972978;R-HSA-6800120;R-HSA-2889036;R-HSA-452838;R-HSA-452515;R-HSA-480685;R-HSA-452392;R-HSA-1112609;R-HSA-2972956;R-HSA-452338;R-HSA-2…
R-HSA-9013404	RAC2 GTPase cycle	9	92	0.00644664	0.238391	0.851808	10	10	0.00073654	9606	Homo sapiens	Tfrc;Ncf1;Ophn1;Ncf4;Rac2;Vrk2;Pik3r1;Dock2;Pak4		R-HSA-9014296;R-HSA-9014424;R-HSA-9714480;R-HSA-9714481;R-HSA-9714483;R-HSA-9714477;R-HSA-9014293;R-HSA-9014420;R-HSA-9014295;R-HSA-9014294
R-HSA-210993	Tie2 Signaling	3	23	0.00161166	0.23939	0.851808	12	14	0.00103116	9606	Homo sapiens	Dok2;Angpt1;Pik3r1		R-HSA-204850;R-HSA-210977;R-HSA-210881;R-HSA-204871;R-HSA-204773;R-HSA-204779;R-HSA-204873;R-HSA-210872;R-HSA-210974;R-HSA-204798;R-HSA-204813;R-HSA-204861
R-HSA-9020956	Interleukin-27 signaling	2	13	0.000910938	0.247226	0.851808	16	20	0.00147308	9606	Homo sapiens	Il27;Il27ra		R-HSA-8950504;R-HSA-8950441;R-HSA-8950537;R-HSA-8950731;R-HSA-448421;R-HSA-8950766;R-HSA-8950210;R-HSA-8950340;R-HSA-448427;R-HSA-8950342;R-HSA-8950716;R-HSA-8950398;R-HSA-8950271;R-HSA-8950674;R-HSA-8950485;R-HSA-8950518
R-HSA-209952	Peptide hormone biosynthesis	2	13	0.000910938	0.247226	0.851808	2	5	0.00036827	9606	Homo sapiens	44808;Inhba		R-HSA-265301;R-HSA-378975
R-HSA-1236973	Cross-presentation of particulate exogenous antigens (phagosomes)	2	13	0.000910938	0.247226	0.851808	1	3	0.000220962	9606	Homo sapiens	Ncf1;Ncf4		R-HSA-1236967
R-HSA-3656234	Defective HEXA causes GM2G1	1	4	0.000280289	0.254353	0.851808	3	3	0.000220962	9606	Homo sapiens	Hexa		R-HSA-9035976;R-HSA-9035978;R-HSA-3656259
R-HSA-2473224	Antagonism of Activin by Follistatin	1	4	0.000280289	0.254353	0.851808	2	2	0.000147308	9606	Homo sapiens	Inhba		R-HSA-2473184;R-HSA-2473186
R-HSA-5684045	Defective ABCD1 causes ALD	1	4	0.000280289	0.254353	0.851808	1	1	7.3654e-05	9606	Homo sapiens	Abcd2		R-HSA-5684043
R-HSA-9672383	Defective factor IX causes thrombophilia	1	4	0.000280289	0.254353	0.851808	1	1	7.3654e-05	9606	Homo sapiens	F9		R-HSA-9668253
R-HSA-5083629	Defective POMT2 causes MDDGA2, MDDGB2 and MDDGC2	1	4	0.000280289	0.254353	0.851808	1	1	7.3654e-05	9606	Homo sapiens	Dag1		R-HSA-5615556
R-HSA-1299503	TWIK related potassium channel (TREK)	1	4	0.000280289	0.254353	0.851808	1	1	7.3654e-05	9606	Homo sapiens	Kcnk2		R-HSA-1296348
R-HSA-5578998	Defective OPLAH causes OPLAHD	1	4	0.000280289	0.254353	0.851808	1	1	7.3654e-05	9606	Homo sapiens	Oplah		R-HSA-5603208
R-HSA-5083633	Defective POMT1 causes MDDGA1, MDDGB1 and MDDGC1	1	4	0.000280289	0.254353	0.851808	1	1	7.3654e-05	9606	Homo sapiens	Dag1		R-HSA-5615604
R-HSA-5619036	Defective SLC24A5 causes oculocutaneous albinism 6 (OCA6)	1	4	0.000280289	0.254353	0.851808	1	1	7.3654e-05	9606	Homo sapiens	Slc24a5		R-HSA-5626356
R-HSA-9035968	Defective GGT1 in aflatoxin detoxification causes GLUTH	1	4	0.000280289	0.254353	0.851808	1	1	7.3654e-05	9606	Homo sapiens	Ggt1		R-HSA-5602984
R-HSA-5683371	Defective ABCB6 causes MCOPCB7	1	4	0.000280289	0.254353	0.851808	1	1	7.3654e-05	9606	Homo sapiens	Abcb6		R-HSA-5683355
R-HSA-9672396	Defective cofactor function of FVIIIa variant	1	4	0.000280289	0.254353	0.851808	1	1	7.3654e-05	9606	Homo sapiens	F9		R-HSA-9668365
R-HSA-9673202	Defective F9 variant does not activate FX	1	4	0.000280289	0.254353	0.851808	1	1	7.3654e-05	9606	Homo sapiens	F9		R-HSA-9670874
R-HSA-844615	The AIM2 inflammasome	1	4	0.000280289	0.254353	0.851808	2	4	0.000294616	9606	Homo sapiens	Pycard		R-HSA-844620;R-HSA-844618
R-HSA-194306	Neurophilin interactions with VEGF and VEGFR	1	4	0.000280289	0.254353	0.851808	1	2	0.000147308	9606	Homo sapiens	Nrp2		R-HSA-195418
R-HSA-9615710	Late endosomal microautophagy	4	35	0.00245253	0.256894	0.851808	3	3	0.000220962	9606	Homo sapiens	Chmp4c;Plin2;Hdac6		R-HSA-9631065;R-HSA-9615721;R-HSA-9631068
R-HSA-199220	Vitamin B5 (pantothenate) metabolism	4	35	0.00245253	0.256894	0.851808	4	12	0.000883848	9606	Homo sapiens	Slc5a6;Gda;Ccdc57;Enpp2		R-HSA-199202;R-HSA-8938314;R-HSA-199216;R-HSA-199206
R-HSA-1222556	ROS and RNS production in phagocytes	8	82	0.00574592	0.25783	0.851808	3	45	0.00331443	9606	Homo sapiens	Ccr1;Ncf1;Ncf4;Rac2;Tcirg1;Atp6v0c;Atp6v0d2;Atp6v0e2		R-HSA-418436;R-HSA-6789092;R-HSA-1222516
R-HSA-9013409	RHOJ GTPase cycle	6	59	0.00413426	0.267864	0.851808	2	3	0.000220962	9606	Homo sapiens	Cpne8;Tfrc;Ophn1;Pik3r1;Pak3;Pak4		R-HSA-9017488;R-HSA-9017507
R-HSA-2426168	Activation of gene expression by SREBF (SREBP)	7	71	0.00497512	0.268664	0.851808	7	42	0.00309347	9606	Homo sapiens	Fdps;Ccdc57;Dhcr7;Lss		R-HSA-2426147;R-HSA-1655824;R-HSA-1655827;R-HSA-1655843;R-HSA-1655828;R-HSA-2426155;R-HSA-2426154
R-HSA-9687139	Aberrant regulation of mitotic cell cycle due to RB1 defects	4	36	0.0025226	0.272882	0.851808	2	3	0.000220962	9606	Homo sapiens	Apc2;Ccnd2;Anapc10;Cdkn1c		R-HSA-9687377;R-HSA-9659782
R-HSA-8941332	RUNX2 regulates genes involved in cell migration	2	14	0.00098101	0.274221	0.851808	7	7	0.000515578	9606	Homo sapiens	Runx2		R-HSA-8939833;R-HSA-8939963;R-HSA-8940001;R-HSA-8939667;R-HSA-8939829;R-HSA-8939670;R-HSA-8940007
R-HSA-391903	Eicosanoid ligand-binding receptors	3	25	0.0017518	0.278498	0.851808	2	14	0.00103116	9606	Homo sapiens	Ptgir;Ptger2		R-HSA-391940;R-HSA-391942
R-HSA-5362517	Signaling by Retinoic Acid	7	73	0.00511527	0.291197	0.851808	6	21	0.00154673	9606	Homo sapiens	Cyp26b1;Dhrs3;Cpt1a;Rdh11;Pdk4;Crabp1;Pkp1		R-HSA-5362721;R-HSA-5622134;R-HSA-200406;R-HSA-203946;R-HSA-5362525;R-HSA-5419165
R-HSA-432722	Golgi Associated Vesicle Biogenesis	6	61	0.0042744	0.292664	0.851808	4	7	0.000515578	9606	Homo sapiens	Ap1m2;Tfrc;Ap1s2;Sort1;Tpd52l1		R-HSA-421831;R-HSA-421836;R-HSA-421835;R-HSA-421833
R-HSA-140837	Intrinsic Pathway of Fibrin Clot Formation	3	26	0.00182188	0.298283	0.851808	7	24	0.0017677	9606	Homo sapiens	F9;Serpine2		R-HSA-158419;R-HSA-9670673;R-HSA-158278;R-HSA-158164;R-HSA-5607023;R-HSA-158137;R-HSA-158333
R-HSA-389357	CD28 dependent PI3K/Akt signaling	3	26	0.00182188	0.298283	0.851808	2	9	0.000662886	9606	Homo sapiens	Cd86;Cd80;Pik3r1		R-HSA-389158;R-HSA-388832
R-HSA-1250342	PI3K events in ERBB4 signaling	2	15	0.00105108	0.301167	0.851808	2	2	0.000147308	9606	Homo sapiens	Btc;Pik3r1		R-HSA-1250370;R-HSA-1250353
R-HSA-428540	Activation of RAC1	2	15	0.00105108	0.301167	0.851808	1	4	0.000294616	9606	Homo sapiens	Pak3;Pak4		R-HSA-428531
R-HSA-159740	Gamma-carboxylation of protein precursors	2	15	0.00105108	0.301167	0.851808	2	9	0.000662886	9606	Homo sapiens	F9		R-HSA-159795;R-HSA-159803
R-HSA-5668599	RHO GTPases Activate NADPH Oxidases	4	38	0.00266274	0.305307	0.851808	11	14	0.00103116	9606	Homo sapiens	Ncf1;Ncf4;Rac2;S100a9		R-HSA-9626848;R-HSA-9626832;R-HSA-9626880;R-HSA-9626816;R-HSA-5668629;R-HSA-9626817;R-HSA-5218827;R-HSA-5218841;R-HSA-5668735;R-HSA-5668605;R-HSA-5668731
R-HSA-1296065	Inwardly rectifying K+ channels	4	38	0.00266274	0.305307	0.851808	4	7	0.000515578	9606	Homo sapiens	Gngt2;Kcnj14;Kcnj9		R-HSA-1013020;R-HSA-1013013;R-HSA-1013012;R-HSA-1296046
R-HSA-9675126	Diseases of mitotic cell cycle	4	38	0.00266274	0.305307	0.851808	2	5	0.00036827	9606	Homo sapiens	Apc2;Ccnd2;Anapc10;Cdkn1c		R-HSA-9687377;R-HSA-9659782
R-HSA-139910	Activation of BMF and translocation to mitochondria	1	5	0.000350361	0.307116	0.851808	2	2	0.000147308	9606	Homo sapiens	Bmf		R-HSA-139908;R-HSA-139909
R-HSA-209563	Axonal growth stimulation	1	5	0.000350361	0.307116	0.851808	2	2	0.000147308	9606	Homo sapiens	Ngfr		R-HSA-193668;R-HSA-193646
R-HSA-1368071	NR1D1 (REV-ERBA) represses gene expression	1	5	0.000350361	0.307116	0.851808	1	1	7.3654e-05	9606	Homo sapiens	Ubxn6		R-HSA-5663252
R-HSA-1296053	Classical Kir channels	1	5	0.000350361	0.307116	0.851808	1	1	7.3654e-05	9606	Homo sapiens	Kcnj14		R-HSA-1296046
R-HSA-5579015	Defective CYP26B1 causes RHFCA	1	5	0.000350361	0.307116	0.851808	1	1	7.3654e-05	9606	Homo sapiens	Cyp26b1		R-HSA-5602063
R-HSA-9673240	Defective gamma-carboxylation of F9	1	5	0.000350361	0.307116	0.851808	1	1	7.3654e-05	9606	Homo sapiens	F9		R-HSA-9673231
R-HSA-417973	Adenosine P1 receptors	1	5	0.000350361	0.307116	0.851808	1	2	0.000147308	9606	Homo sapiens	Adora2a		R-HSA-418925
R-HSA-844455	The NLRP1 inflammasome	1	5	0.000350361	0.307116	0.851808	1	4	0.000294616	9606	Homo sapiens	Bcl2		R-HSA-879201
R-HSA-1655829	Regulation of cholesterol biosynthesis by SREBP (SREBF)	8	87	0.00609628	0.309914	0.851808	9	52	0.00383001	9606	Homo sapiens	Fdps;Ccdc57;Dhcr7;Lss;Sec24d		R-HSA-1655834;R-HSA-2426147;R-HSA-1655825;R-HSA-1655824;R-HSA-1655827;R-HSA-1655843;R-HSA-1655828;R-HSA-2426155;R-HSA-2426154
R-HSA-211979	Eicosanoids	3	27	0.00189195	0.318141	0.851808	4	6	0.000441924	9606	Homo sapiens	Ptgis;Tbxas1;Cyp4b1		R-HSA-76496;R-HSA-211873;R-HSA-76500;R-HSA-215526
R-HSA-2022377	Metabolism of Angiotensinogen to Angiotensins	3	27	0.00189195	0.318141	0.851808	4	20	0.00147308	9606	Homo sapiens	Ctsd;Cma1;Cpb1		R-HSA-2022383;R-HSA-2022412;R-HSA-2028294;R-HSA-2022403
R-HSA-5083635	Defective B3GALTL causes PpS	4	39	0.00273281	0.321675	0.851808	1	1	7.3654e-05	9606	Homo sapiens	Adamts10;Sbspon;Thsd7a;Cfp		R-HSA-6785565
R-HSA-389356	CD28 co-stimulation	4	39	0.00273281	0.321675	0.851808	12	19	0.00139943	9606	Homo sapiens	Cd86;Cd80;Pik3r1;Pak3		R-HSA-389381;R-HSA-389348;R-HSA-389158;R-HSA-389350;R-HSA-388832;R-HSA-389788;R-HSA-388831;R-HSA-388814;R-HSA-389352;R-HSA-388808;R-HSA-388811;R-HSA-389354
R-HSA-9662360	Sensory processing of sound by inner hair cells of the cochlea	7	76	0.00532549	0.32573	0.851808	2	7	0.000515578	9606	Homo sapiens	Tmie;Cib2;Myo3b;Eps8l2;Acp1;Slc17a8;Espn		R-HSA-9662096;R-HSA-9659380
R-HSA-156582	Acetylation	2	16	0.00112115	0.327936	0.851808	4	4	0.000294616	9606	Homo sapiens	Nat2		R-HSA-174963;R-HSA-158832;R-HSA-174967;R-HSA-174959
R-HSA-3000484	Scavenging by Class F Receptors	2	16	0.00112115	0.327936	0.851808	2	2	0.000147308	9606	Homo sapiens	Hsph1;Scarf1		R-HSA-2247514;R-HSA-2197645
R-HSA-179812	GRB2 events in EGFR signaling	2	16	0.00112115	0.327936	0.851808	2	3	0.000220962	9606	Homo sapiens	Btc;Epgn		R-HSA-177938;R-HSA-177943
R-HSA-159854	Gamma-carboxylation, transport, and amino-terminal cleavage of proteins	2	16	0.00112115	0.327936	0.851808	6	27	0.00198866	9606	Homo sapiens	F9		R-HSA-159762;R-HSA-159795;R-HSA-159796;R-HSA-159803;R-HSA-159771;R-HSA-159836
R-HSA-9033658	Blood group systems biosynthesis	5	52	0.00364375	0.335009	0.851808	4	22	0.00162039	9606	Homo sapiens	Fut7;B3galt2;Fut1;Rhd		R-HSA-9605682;R-HSA-9033949;R-HSA-9603989;R-HSA-9038658
R-HSA-8935690	Digestion	6	65	0.00455469	0.343446	0.851808	5	24	0.0017677	9606	Homo sapiens	Mgam;Star;Amy1		R-HSA-188979;R-HSA-191114;R-HSA-189102;R-HSA-8936214;R-HSA-191116
R-HSA-1502540	Signaling by Activin	2	17	0.00119123	0.354419	0.851808	10	10	0.00073654	9606	Homo sapiens	Smad2;Inhba		R-HSA-1549526;R-HSA-173488;R-HSA-1181153;R-HSA-2473184;R-HSA-2470483;R-HSA-2473186;R-HSA-2470508;R-HSA-1225919;R-HSA-170847;R-HSA-1181149
R-HSA-9661069	Defective binding of RB1 mutants to E2F1,(E2F2, E2F3)	2	17	0.00119123	0.354419	0.851808	1	1	7.3654e-05	9606	Homo sapiens	Ccnd2;Cdkn1c		R-HSA-9659782
R-HSA-8877330	RUNX1 and FOXP3 control the development of regulatory T lymphocytes (Tregs)	2	17	0.00119123	0.354419	0.851808	13	20	0.00147308	9606	Homo sapiens	Foxp3		R-HSA-8877414;R-HSA-8877348;R-HSA-8877345;R-HSA-8877391;R-HSA-8877421;R-HSA-8865547;R-HSA-8865546;R-HSA-8877192;R-HSA-8877493;R-HSA-8877396;R-HSA-8877490;R-HSA-8877369;R-HSA-9006422
R-HSA-9659787	Aberrant regulation of mitotic G1/S transition in cancer due to RB1 defects	2	17	0.00119123	0.354419	0.851808	1	2	0.000147308	9606	Homo sapiens	Ccnd2;Cdkn1c		R-HSA-9659782
R-HSA-5173214	O-glycosylation of TSR domain-containing proteins	4	41	0.00287296	0.35456	0.851808	2	2	0.000147308	9606	Homo sapiens	Adamts10;Sbspon;Thsd7a;Cfp		R-HSA-5173005;R-HSA-5173192
R-HSA-5365859	RA biosynthesis pathway	4	41	0.00287296	0.35456	0.851808	4	11	0.000810194	9606	Homo sapiens	Cyp26b1;Dhrs3;Rdh11;Crabp1		R-HSA-5362721;R-HSA-5622134;R-HSA-5362525;R-HSA-5419165
R-HSA-205025	NADE modulates death signalling	1	6	0.000420433	0.356148	0.851808	3	3	0.000220962	9606	Homo sapiens	Ngfr		R-HSA-193650;R-HSA-204981;R-HSA-205117
R-HSA-8952158	RUNX3 regulates BCL2L11 (BIM) transcription	1	6	0.000420433	0.356148	0.851808	2	2	0.000147308	9606	Homo sapiens	Foxo3		R-HSA-8952232;R-HSA-8952226
R-HSA-5339717	Signaling by LRP5 mutants	1	6	0.000420433	0.356148	0.851808	1	1	7.3654e-05	9606	Homo sapiens	Dkk2		R-HSA-5339711
R-HSA-5083630	Defective LFNG causes SCDO3	1	6	0.000420433	0.356148	0.851808	1	1	7.3654e-05	9606	Homo sapiens	Notch3		R-HSA-5096538
R-HSA-3656532	TGFBR1 KD Mutants in Cancer	1	6	0.000420433	0.356148	0.851808	1	1	7.3654e-05	9606	Homo sapiens	Smad2		R-HSA-3656523
R-HSA-1306955	GRB7 events in ERBB2 signaling	1	6	0.000420433	0.356148	0.851808	1	1	7.3654e-05	9606	Homo sapiens	Erbb3		R-HSA-1306953
R-HSA-193670	p75NTR negatively regulates cell cycle via SC1	1	6	0.000420433	0.356148	0.851808	1	3	0.000220962	9606	Homo sapiens	Ngfr		R-HSA-193643
R-HSA-9706374	FLT3 signaling through SRC family kinases	1	6	0.000420433	0.356148	0.851808	1	4	0.000294616	9606	Homo sapiens	Syk		R-HSA-9706336
R-HSA-173736	Alternative complement activation	1	6	0.000420433	0.356148	0.851808	2	9	0.000662886	9606	Homo sapiens	Cfp		R-HSA-174551;R-HSA-173754
R-HSA-140834	Extrinsic Pathway of Fibrin Clot Formation	1	6	0.000420433	0.356148	0.851808	1	8	0.000589232	9606	Homo sapiens	F9		R-HSA-140823
R-HSA-2022090	Assembly of collagen fibrils and other multimeric structures	6	67	0.00469484	0.369179	0.851808	8	26	0.001915	9606	Homo sapiens	Itgb4;Col24a1;Col8a2;Itga6;Loxl4		R-HSA-2213201;R-HSA-2022141;R-HSA-2213207;R-HSA-2395340;R-HSA-2213192;R-HSA-2213210;R-HSA-1474266;R-HSA-2002466
R-HSA-110328	Recognition and association of DNA glycosylase with site containing an affected pyrimidine	4	42	0.00294303	0.371015	0.851808	4	21	0.00154673	9606	Homo sapiens	Hist1h2ac;Hist1h4i;Tdg;Trf		R-HSA-110210;R-HSA-110159;R-HSA-9629372;R-HSA-110158
R-HSA-420029	Tight junction interactions	3	30	0.00210217	0.377602	0.851808	2	3	0.000220962	9606	Homo sapiens	Cldn3;Cldn7;Pard6g		R-HSA-420019;R-HSA-419981
R-HSA-8963889	Assembly of active LPL and LIPC lipase complexes	3	30	0.00210217	0.377602	0.851808	5	12	0.000883848	9606	Homo sapiens	Apc2;Lipc		R-HSA-6784622;R-HSA-6785181;R-HSA-6785213;R-HSA-5694109;R-HSA-6785178
R-HSA-3295583	TRP channels	3	30	0.00210217	0.377602	0.851808	1	4	0.000294616	9606	Homo sapiens	Trpc1;Trpv3;Trpv2		R-HSA-3295579
R-HSA-8847993	ERBB2 Activates PTK6 Signaling	2	18	0.0012613	0.380522	0.851808	2	2	0.000147308	9606	Homo sapiens	Btc;Erbb3		R-HSA-8848005;R-HSA-8847995
R-HSA-391160	Signal regulatory protein family interactions	2	18	0.0012613	0.380522	0.851808	9	10	0.00073654	9606	Homo sapiens	Sirpa		R-HSA-391157;R-HSA-391156;R-HSA-210274;R-HSA-391158;R-HSA-391153;R-HSA-391152;R-HSA-391155;R-HSA-391151;R-HSA-391150
R-HSA-804914	Transport of fatty acids	2	18	0.0012613	0.380522	0.851808	1	2	0.000147308	9606	Homo sapiens	Slc27a1;Slc27a6		R-HSA-879585
R-HSA-166187	Mitochondrial Uncoupling	2	18	0.0012613	0.380522	0.851808	4	9	0.000662886	9606	Homo sapiens	Ucp2;Slc25a14		R-HSA-166387;R-HSA-166214;R-HSA-170026;R-HSA-166220
R-HSA-977443	GABA receptor activation	6	68	0.00476491	0.382079	0.851808	10	12	0.000883848	9606	Homo sapiens	Gngt2;Kcnj14;Gabrb3;Kcnj9;Adcy2		R-HSA-170674;R-HSA-975340;R-HSA-1013020;R-HSA-170666;R-HSA-8856398;R-HSA-1013013;R-HSA-392206;R-HSA-1013012;R-HSA-170686;R-HSA-170671
R-HSA-418555	G alpha (s) signalling events	14	172	0.0120524	0.384879	0.851808	8	18	0.00132577	9606	Homo sapiens	Adora2a;Gngt2;Vipr2;Gpr25;Ptgir;Vipr1;Ptger2;44808;Pde3b;Pde4d;Pde1a;Adcy2;Pthlh		R-HSA-379044;R-HSA-163617;R-HSA-392129;R-HSA-9705507;R-HSA-744887;R-HSA-744886;R-HSA-751013;R-HSA-418553
R-HSA-114604	GPVI-mediated activation cascade	4	43	0.0030131	0.387439	0.851808	12	25	0.00184135	9606	Homo sapiens	Syk;Rac2;Pik3r6;Pik3r1		R-HSA-114689;R-HSA-139842;R-HSA-434836;R-HSA-453200;R-HSA-437936;R-HSA-442273;R-HSA-5684801;R-HSA-437118;R-HSA-453183;R-HSA-437932;R-HSA-437162;R-HSA-429449
R-HSA-381038	XBP1(S) activates chaperone genes	8	95	0.00665686	0.39676	0.851808	4	47	0.00346174	9606	Homo sapiens	Fkbp14;Syvn1;Pdia5;Dnajb9		R-HSA-1791114;R-HSA-1791084;R-HSA-1791122;R-HSA-1791124
R-HSA-1296041	Activation of G protein gated Potassium channels	3	31	0.00217224	0.397223	0.851808	3	3	0.000220962	9606	Homo sapiens	Gngt2;Kcnj14;Kcnj9		R-HSA-1013020;R-HSA-1013013;R-HSA-1013012
R-HSA-997272	Inhibition of voltage gated Ca2+ channels via Gbeta/gamma subunits	3	31	0.00217224	0.397223	0.851808	3	3	0.000220962	9606	Homo sapiens	Gngt2;Kcnj14;Kcnj9		R-HSA-1013020;R-HSA-1013013;R-HSA-1013012
R-HSA-1296059	G protein gated Potassium channels	3	31	0.00217224	0.397223	0.851808	3	3	0.000220962	9606	Homo sapiens	Gngt2;Kcnj14;Kcnj9		R-HSA-1013020;R-HSA-1013013;R-HSA-1013012
R-HSA-3214842	HDMs demethylate histones	3	31	0.00217224	0.397223	0.851808	7	17	0.00125212	9606	Homo sapiens	Hist1h4i;Kdm4b;Kdm6b		R-HSA-5661124;R-HSA-5661125;R-HSA-4754187;R-HSA-5661120;R-HSA-5661121;R-HSA-4724279;R-HSA-5423117
R-HSA-2453864	Retinoid cycle disease events	3	31	0.00217224	0.397223	0.851808	4	16	0.00117846	9606	Homo sapiens	Opn1sw;Rdh11;Rbp1		R-HSA-2466710;R-HSA-2471670;R-HSA-2466834;R-HSA-2466861
R-HSA-2474795	Diseases associated with visual transduction	3	31	0.00217224	0.397223	0.851808	4	17	0.00125212	9606	Homo sapiens	Opn1sw;Rdh11;Rbp1		R-HSA-2466710;R-HSA-2471670;R-HSA-2466834;R-HSA-2466861
R-HSA-9675143	Diseases of the neuronal system	3	31	0.00217224	0.397223	0.851808	4	17	0.00125212	9606	Homo sapiens	Opn1sw;Rdh11;Rbp1		R-HSA-2466710;R-HSA-2471670;R-HSA-2466834;R-HSA-2466861
R-HSA-9673221	Defective F9 activation	1	7	0.000490505	0.401713	0.851808	1	1	7.3654e-05	9606	Homo sapiens	F9		R-HSA-9673223
R-HSA-3304356	SMAD2/3 Phosphorylation Motif Mutants in Cancer	1	7	0.000490505	0.401713	0.851808	1	1	7.3654e-05	9606	Homo sapiens	Smad2		R-HSA-3304394
R-HSA-9014826	Interleukin-36 pathway	1	7	0.000490505	0.401713	0.851808	2	3	0.000220962	9606	Homo sapiens	Il1f9		R-HSA-8848316;R-HSA-8848314
R-HSA-3656534	Loss of Function of TGFBR1 in Cancer	1	7	0.000490505	0.401713	0.851808	1	2	0.000147308	9606	Homo sapiens	Smad2		R-HSA-3656523
R-HSA-420597	Nectin/Necl trans heterodimerization	1	7	0.000490505	0.401713	0.851808	3	8	0.000589232	9606	Homo sapiens	Cadm3		R-HSA-420582;R-HSA-420586;R-HSA-420584
R-HSA-1606341	IRF3 mediated activation of type 1 IFN	1	7	0.000490505	0.401713	0.851808	1	6	0.000441924	9606	Homo sapiens	Dtx4		R-HSA-1606327
R-HSA-9696270	RND2 GTPase cycle	4	44	0.00308318	0.403805	0.851808	1	2	0.000147308	9606	Homo sapiens	Tfrc;Fam83b;Pik3r1;Ptpn13		R-HSA-9696266
R-HSA-9013420	RHOU GTPase cycle	4	44	0.00308318	0.403805	0.851808	1	4	0.000294616	9606	Homo sapiens	Pik3r1;Pak3;Arhgap30;Pak4		R-HSA-9018766
R-HSA-8948216	Collagen chain trimerization	4	44	0.00308318	0.403805	0.851808	5	28	0.00206231	9606	Homo sapiens	Col23a1;Col24a1;Col8a2		R-HSA-8944218;R-HSA-8944220;R-HSA-8944257;R-HSA-8944229;R-HSA-8944230
R-HSA-180336	SHC1 events in EGFR signaling	2	19	0.00133137	0.406166	0.851808	4	4	0.000294616	9606	Homo sapiens	Btc;Epgn		R-HSA-177936;R-HSA-177925;R-HSA-177945;R-HSA-177933
R-HSA-6785631	ERBB2 Regulates Cell Motility	2	19	0.00133137	0.406166	0.851808	2	2	0.000147308	9606	Homo sapiens	Btc;Erbb3		R-HSA-6785636;R-HSA-6785648
R-HSA-399954	Sema3A PAK dependent Axon repulsion	2	19	0.00133137	0.406166	0.851808	3	6	0.000441924	9606	Homo sapiens	Pak3;Plxna1		R-HSA-399939;R-HSA-399952;R-HSA-399930
R-HSA-8876725	Protein methylation	2	19	0.00133137	0.406166	0.851808	2	9	0.000662886	9606	Homo sapiens	Camkmt;Art3		R-HSA-8879123;R-HSA-6786205
R-HSA-416700	Other semaphorin interactions	2	19	0.00133137	0.406166	0.851808	2	9	0.000662886	9606	Homo sapiens	Plxnc1;Plxna1		R-HSA-416725;R-HSA-434989
R-HSA-418885	DCC mediated attractive signaling	2	19	0.00133137	0.406166	0.851808	1	12	0.000883848	9606	Homo sapiens	Ablim2;Ablim3		R-HSA-418865
R-HSA-8874081	MET activates PTK2 signaling	3	32	0.00224231	0.416672	0.851808	1	5	0.00036827	9606	Homo sapiens	Lama5;Lama1;Col24a1		R-HSA-8874079
R-HSA-1643713	Signaling by EGFR in Cancer	3	32	0.00224231	0.416672	0.851808	5	42	0.00309347	9606	Homo sapiens	Btc;Epgn;Pik3r1		R-HSA-5637765;R-HSA-1225978;R-HSA-1226014;R-HSA-1226012;R-HSA-5637801
R-HSA-9013149	RAC1 GTPase cycle	15	191	0.0133838	0.43093	0.851808	4	6	0.000441924	9606	Homo sapiens	Spata13;Tfrc;Ncf1;Ophn1;Ncf4;Vrk2;Dock2;Sh3bp1;Farp2;Pik3r1;Pak3;Iqgap2;Arhgap30;Pak4;Ngef		R-HSA-9013145;R-HSA-9013144;R-HSA-9691174;R-HSA-9013143
R-HSA-399955	SEMA3A-Plexin repulsion signaling by inhibiting Integrin adhesion	2	20	0.00140144	0.431286	0.851808	8	8	0.000589232	9606	Homo sapiens	Farp2;Plxna1		R-HSA-399942;R-HSA-399941;R-HSA-399938;R-HSA-399936;R-HSA-399934;R-HSA-399935;R-HSA-399933;R-HSA-399928
R-HSA-176412	Phosphorylation of the APC/C	2	20	0.00140144	0.431286	0.851808	2	2	0.000147308	9606	Homo sapiens	Apc2;Anapc10		R-HSA-174119;R-HSA-174132
R-HSA-5576886	Phase 4 - resting membrane potential	2	20	0.00140144	0.431286	0.851808	2	2	0.000147308	9606	Homo sapiens	Kcnk2;Kcnj14		R-HSA-5578910;R-HSA-1296046
R-HSA-9687136	Aberrant regulation of mitotic exit in cancer due to RB1 defects	2	20	0.00140144	0.431286	0.851808	1	1	7.3654e-05	9606	Homo sapiens	Apc2;Anapc10		R-HSA-9687377
R-HSA-2485179	Activation of the phototransduction cascade	2	20	0.00140144	0.431286	0.851808	4	8	0.000589232	9606	Homo sapiens	Pde6g;Cngb1		R-HSA-74065;R-HSA-2514867;R-HSA-2514865;R-HSA-74059
R-HSA-9603798	Class I peroxisomal membrane protein import	2	20	0.00140144	0.431286	0.851808	3	6	0.000441924	9606	Homo sapiens	Abcd2		R-HSA-9603784;R-HSA-9603775;R-HSA-9603804
R-HSA-2187335	The retinoid cycle in cones (daylight vision)	2	20	0.00140144	0.431286	0.851808	4	13	0.000957502	9606	Homo sapiens	Dhrs3;Opn1sw		R-HSA-2466085;R-HSA-2465940;R-HSA-2465917;R-HSA-9656891
R-HSA-5576891	Cardiac conduction	11	138	0.00966996	0.432601	0.851808	14	27	0.00198866	9606	Homo sapiens	Ccr1;Kcnk2;Fxyd3;Kcnj14;Trpc1;Atp1b2;Atp2b4;Atp1a3;Scn8a;Gata4;Itpr3		R-HSA-418309;R-HSA-2089943;R-HSA-5576895;R-HSA-5617182;R-HSA-5578910;R-HSA-139854;R-HSA-5617179;R-HSA-5617178;R-HSA-936897;R-HSA-169683;R-HSA-9684068;R-HSA-5226904;R-HSA-1296046;R-HSA-2032800
R-HSA-8963743	Digestion and absorption	6	72	0.0050452	0.433574	0.851808	5	30	0.00220962	9606	Homo sapiens	Mgam;Star;Amy1		R-HSA-188979;R-HSA-191114;R-HSA-189102;R-HSA-8936214;R-HSA-191116
R-HSA-445095	Interaction between L1 and Ankyrins	3	33	0.00231238	0.435912	0.851808	4	4	0.000294616	9606	Homo sapiens	Scn8a;Ank3;Nrcam		R-HSA-445076;R-HSA-374675;R-HSA-392751;R-HSA-373739
R-HSA-983712	Ion channel transport	16	206	0.0144349	0.443598	0.851808	11	45	0.00331443	9606	Homo sapiens	Clcn6;Fxyd3;Atp1b2;Atp2b4;Atp1a3;Atp10d;Ano6;Atp6v0d2;Atp6v0e2;Ttyh1;Trpc1;Tcirg1;Trpv3;Trpv2;Atp6v0c		R-HSA-418309;R-HSA-2744349;R-HSA-5252133;R-HSA-9684068;R-HSA-3295579;R-HSA-947591;R-HSA-2744242;R-HSA-2684901;R-HSA-2730692;R-HSA-939763;R-HSA-936897
R-HSA-111957	Cam-PDE 1 activation	1	8	0.000560577	0.444057	0.851808	2	2	0.000147308	9606	Homo sapiens	Pde1a		R-HSA-111955;R-HSA-111956
R-HSA-165160	PDE3B signalling	1	8	0.000560577	0.444057	0.851808	2	2	0.000147308	9606	Homo sapiens	Pde3b		R-HSA-162363;R-HSA-162425
R-HSA-109703	PKB-mediated events	1	8	0.000560577	0.444057	0.851808	2	2	0.000147308	9606	Homo sapiens	Pde3b		R-HSA-162363;R-HSA-162425
R-HSA-9017802	Noncanonical activation of NOTCH3	1	8	0.000560577	0.444057	0.851808	2	2	0.000147308	9606	Homo sapiens	Notch3		R-HSA-9017817;R-HSA-9017797
R-HSA-3304349	Loss of Function of SMAD2/3 in Cancer	1	8	0.000560577	0.444057	0.851808	2	2	0.000147308	9606	Homo sapiens	Smad2		R-HSA-3304394;R-HSA-3315483
R-HSA-5688890	Defective CSF2RA causes SMDP4	1	8	0.000560577	0.444057	0.851808	1	1	7.3654e-05	9606	Homo sapiens	Csf2rb		R-HSA-5688899
R-HSA-5688849	Defective CSF2RB causes SMDP5	1	8	0.000560577	0.444057	0.851808	1	1	7.3654e-05	9606	Homo sapiens	Csf2rb		R-HSA-5688884
R-HSA-9652817	Signaling by MAPK mutants	1	8	0.000560577	0.444057	0.851808	1	1	7.3654e-05	9606	Homo sapiens	Dusp8		R-HSA-9652816
R-HSA-4341670	Defective NEU1 causes sialidosis	1	8	0.000560577	0.444057	0.851808	1	1	7.3654e-05	9606	Homo sapiens	Neu1		R-HSA-4341669
R-HSA-187024	NGF-independant TRKA activation	1	8	0.000560577	0.444057	0.851808	2	4	0.000294616	9606	Homo sapiens	Adora2a		R-HSA-9613023;R-HSA-187661
R-HSA-5660668	CLEC7A/inflammasome pathway	1	8	0.000560577	0.444057	0.851808	2	4	0.000294616	9606	Homo sapiens	Pycard		R-HSA-5660662;R-HSA-5660663
R-HSA-193681	Ceramide signalling	1	8	0.000560577	0.444057	0.851808	1	2	0.000147308	9606	Homo sapiens	Ngfr		R-HSA-193672
R-HSA-8937144	Aryl hydrocarbon receptor signalling	1	8	0.000560577	0.444057	0.851808	1	5	0.00036827	9606	Homo sapiens	Ahrr		R-HSA-8936851
R-HSA-5362798	Release of Hh-Np from the secreting cell	1	8	0.000560577	0.444057	0.851808	1	5	0.00036827	9606	Homo sapiens	Notum		R-HSA-5362553
R-HSA-171306	Packaging Of Telomere Ends	3	34	0.00238245	0.454909	0.851808	2	2	0.000147308	9606	Homo sapiens	Hist1h2ac;Hist1h4i;Trf		R-HSA-181450;R-HSA-176700
R-HSA-8940973	RUNX2 regulates osteoblast differentiation	3	34	0.00238245	0.454909	0.851808	21	24	0.0017677	9606	Homo sapiens	Hdac6;Runx2		R-HSA-9008137;R-HSA-8937864;R-HSA-8985227;R-HSA-9008877;R-HSA-8939852;R-HSA-8985485;R-HSA-8877922;R-HSA-8985644;R-HSA-8937869;R-HSA-8877902;R-HSA-8984994;R-HSA-9008389;R-HSA-9009208;R-HSA-8985627;R-HSA-8985275;R-HSA-8939870;R-HSA-9008177;R-HSA-8877918;R-HSA-2064932;R-HSA-8985460;R-HSA-9008215
R-HSA-622312	Inflammasomes	3	34	0.00238245	0.454909	0.851808	7	28	0.00206231	9606	Homo sapiens	Pycard;Bcl2;Mefv		R-HSA-844620;R-HSA-844618;R-HSA-844612;R-HSA-879221;R-HSA-877361;R-HSA-879201;R-HSA-844610
R-HSA-9659379	Sensory processing of sound	7	87	0.00609628	0.455128	0.851808	3	13	0.000957502	9606	Homo sapiens	Tmie;Cib2;Myo3b;Eps8l2;Acp1;Slc17a8;Espn		R-HSA-9663363;R-HSA-9662096;R-HSA-9659380
R-HSA-141430	Inactivation of APC/C via direct inhibition of the APC/C complex	2	21	0.00147152	0.455827	0.851808	1	2	0.000147308	9606	Homo sapiens	Apc2;Anapc10		R-HSA-141423
R-HSA-141405	Inhibition of the proteolytic activity of APC/C required for the onset of anaphase by mitotic spindle checkpoint components	2	21	0.00147152	0.455827	0.851808	1	3	0.000220962	9606	Homo sapiens	Apc2;Anapc10		R-HSA-141423
R-HSA-381070	IRE1alpha activates chaperones	8	101	0.00707729	0.462343	0.851808	4	53	0.00390366	9606	Homo sapiens	Fkbp14;Syvn1;Pdia5;Dnajb9		R-HSA-1791114;R-HSA-1791084;R-HSA-1791122;R-HSA-1791124
R-HSA-177929	Signaling by EGFR	5	61	0.0042744	0.463395	0.851808	40	49	0.00360904	9606	Homo sapiens	Btc;Epgn;Sh3gl3;Pik3r1;Pag1		R-HSA-177922;R-HSA-177923;R-HSA-177926;R-HSA-177927;R-HSA-177924;R-HSA-177925;R-HSA-177930;R-HSA-182986;R-HSA-183051;R-HSA-8951490;R-HSA-177934;R-HSA-182990;R-HSA-177935;R-HSA-183055;R-HSA-177933;R-HSA-177938;R-HSA-183058;R-HSA-182994;R-HSA-177939;R-HSA-177936;R-HSA-177937;R-HSA-182993;R-HSA-177942;R-HSA-177943;R-HSA-177941;R-HSA-183002;R-HSA-183067;R-HSA-177944;R-HSA-177945;R-HSA-8867047;R-HSA-2…
R-HSA-3000171	Non-integrin membrane-ECM interactions	5	61	0.0042744	0.463395	0.851808	5	22	0.00162039	9606	Homo sapiens	Lama5;Lama1;Itgb4;Dag1;Itga6		R-HSA-2426263;R-HSA-2328129;R-HSA-2396113;R-HSA-2426355;R-HSA-2731074
R-HSA-9664565	Signaling by ERBB2 KD Mutants	3	35	0.00245253	0.473632	0.851808	10	17	0.00125212	9606	Homo sapiens	Btc;Erbb3;Pik3r1		R-HSA-9664976;R-HSA-9664567;R-HSA-9664983;R-HSA-9664950;R-HSA-9664646;R-HSA-9664933;R-HSA-9664664;R-HSA-9664991;R-HSA-9664588;R-HSA-9664940
R-HSA-420092	Glucagon-type ligand receptors	3	35	0.00245253	0.473632	0.851808	2	8	0.000589232	9606	Homo sapiens	Vipr2;Vipr1;Gngt2		R-HSA-381612;R-HSA-420233
R-HSA-176407	Conversion from APC/C:Cdc20 to APC/C:Cdh1 in late anaphase	2	22	0.00154159	0.479745	0.851808	2	3	0.000220962	9606	Homo sapiens	Apc2;Anapc10		R-HSA-174224;R-HSA-174070
R-HSA-2022857	Keratan sulfate degradation	2	22	0.00154159	0.479745	0.851808	3	7	0.000515578	9606	Homo sapiens	Hexa;Fmod		R-HSA-2046239;R-HSA-1793217;R-HSA-1638053
R-HSA-1614517	Sulfide oxidation to sulfate	2	22	0.00154159	0.479745	0.851808	2	6	0.000441924	9606	Homo sapiens	Tst;Suox		R-HSA-1614618;R-HSA-1614544
R-HSA-3656244	Defective B4GALT1 causes B4GALT1-CDG (CDG-2d)	1	9	0.00063065	0.483406	0.851808	3	3	0.000220962	9606	Homo sapiens	Fmod		R-HSA-3656230;R-HSA-9035949;R-HSA-9035950
R-HSA-1855231	Synthesis of IPs in the ER lumen	1	9	0.00063065	0.483406	0.851808	3	3	0.000220962	9606	Homo sapiens	Minpp1		R-HSA-1855225;R-HSA-1855163;R-HSA-1855200
R-HSA-5579026	Defective CYP11A1 causes AICSR	1	9	0.00063065	0.483406	0.851808	1	1	7.3654e-05	9606	Homo sapiens	Fdxr		R-HSA-5580269
R-HSA-3656243	Defective ST3GAL3 causes MCT12 and EIEE15	1	9	0.00063065	0.483406	0.851808	1	1	7.3654e-05	9606	Homo sapiens	Fmod		R-HSA-3656258
R-HSA-3656225	Defective CHST6 causes MCDC1	1	9	0.00063065	0.483406	0.851808	1	1	7.3654e-05	9606	Homo sapiens	Fmod		R-HSA-3656269
R-HSA-5250981	Toxicity of botulinum toxin type F (botF)	1	9	0.00063065	0.483406	0.851808	3	5	0.00036827	9606	Homo sapiens	Sv2c		R-HSA-5250880;R-HSA-5250884;R-HSA-5250875
R-HSA-5250955	Toxicity of botulinum toxin type D (botD)	1	9	0.00063065	0.483406	0.851808	3	5	0.00036827	9606	Homo sapiens	Sv2c		R-HSA-5250600;R-HSA-5250616;R-HSA-5250607
R-HSA-3304351	Signaling by TGF-beta Receptor Complex in Cancer	1	9	0.00063065	0.483406	0.851808	4	7	0.000515578	9606	Homo sapiens	Smad2		R-HSA-3311014;R-HSA-3304394;R-HSA-3315483;R-HSA-3656523
R-HSA-8939256	RUNX1 regulates transcription of genes involved in WNT signaling	1	9	0.00063065	0.483406	0.851808	2	4	0.000294616	9606	Homo sapiens	Foxp3		R-HSA-8877879;R-HSA-8877884
R-HSA-350864	Regulation of thyroid hormone activity	1	9	0.00063065	0.483406	0.851808	1	2	0.000147308	9606	Homo sapiens	Dio2		R-HSA-209772
R-HSA-9013425	RHOT1 GTPase cycle	1	9	0.00063065	0.483406	0.851808	1	3	0.000220962	9606	Homo sapiens	Myo19		R-HSA-9018815
R-HSA-6806942	MET Receptor Activation	1	9	0.00063065	0.483406	0.851808	1	5	0.00036827	9606	Homo sapiens	Hgfac		R-HSA-6800299
R-HSA-447043	Neurofascin interactions	1	9	0.00063065	0.483406	0.851808	1	7	0.000515578	9606	Homo sapiens	Nrcam		R-HSA-373730
R-HSA-9662001	Defective factor VIII causes hemophilia A	1	9	0.00063065	0.483406	0.851808	1	8	0.000589232	9606	Homo sapiens	F9		R-HSA-9668365
R-HSA-2424491	DAP12 signaling	3	36	0.0025226	0.492055	0.851808	10	17	0.00125212	9606	Homo sapiens	Syk;Klrc1;Pik3r1		R-HSA-2395412;R-HSA-2424484;R-HSA-2424486;R-HSA-210289;R-HSA-2424487;R-HSA-2424480;R-HSA-2396594;R-HSA-2424482;R-HSA-2395439;R-HSA-2395801
R-HSA-1227990	Signaling by ERBB2 in Cancer	3	36	0.0025226	0.492055	0.851808	18	62	0.00456655	9606	Homo sapiens	Btc;Erbb3;Pik3r1		R-HSA-9664976;R-HSA-9664567;R-HSA-9664983;R-HSA-9664950;R-HSA-9664664;R-HSA-9664991;R-HSA-9665407;R-HSA-9665699;R-HSA-9665697;R-HSA-9665415;R-HSA-9664646;R-HSA-9665701;R-HSA-9664933;R-HSA-9665700;R-HSA-9665705;R-HSA-9665709;R-HSA-9664588;R-HSA-9664940
R-HSA-991365	Activation of GABAB receptors	4	50	0.00350361	0.499452	0.851808	8	8	0.000589232	9606	Homo sapiens	Gngt2;Kcnj14;Kcnj9;Adcy2		R-HSA-170674;R-HSA-1013020;R-HSA-170666;R-HSA-1013013;R-HSA-392206;R-HSA-1013012;R-HSA-170686;R-HSA-170671
R-HSA-977444	GABA B receptor activation	4	50	0.00350361	0.499452	0.851808	8	9	0.000662886	9606	Homo sapiens	Gngt2;Kcnj14;Kcnj9;Adcy2		R-HSA-170674;R-HSA-1013020;R-HSA-170666;R-HSA-1013013;R-HSA-392206;R-HSA-1013012;R-HSA-170686;R-HSA-170671
R-HSA-9013148	CDC42 GTPase cycle	12	159	0.0111415	0.500057	0.851808	3	6	0.000441924	9606	Homo sapiens	Cpne8;Spata13;Arhgef16;Tfrc;Kctd3;Ophn1;Pik3r1;Pak3;Iqgap2;Arhgap30;Pak4;Ngef		R-HSA-9013161;R-HSA-9013157;R-HSA-9013159
R-HSA-9679191	Potential therapeutics for SARS	7	91	0.00637657	0.501363	0.851808	5	34	0.00250424	9606	Homo sapiens	Fxyd3;Itga4;Atp1b2;Atp1a3;Ifngr1;Rbp1;Tlr7		R-HSA-9678561;R-HSA-9679029;R-HSA-9684068;R-HSA-9679787;R-HSA-9679740
R-HSA-9613829	Chaperone Mediated Autophagy	2	23	0.00161166	0.503007	0.851808	9	19	0.00139943	9606	Homo sapiens	Plin2;Hdac6		R-HSA-9625188;R-HSA-9620197;R-HSA-9622840;R-HSA-9615721;R-HSA-9624158;R-HSA-9622831;R-HSA-9625196;R-HSA-9626060;R-HSA-9625197
R-HSA-8849932	Synaptic adhesion-like molecules	2	23	0.00161166	0.503007	0.851808	2	8	0.000589232	9606	Homo sapiens	Rtn1;Ptprf		R-HSA-8855648;R-HSA-8849882
R-HSA-5625900	RHO GTPases activate CIT	2	23	0.00161166	0.503007	0.851808	1	6	0.000441924	9606	Homo sapiens	Myh14;Ppp1r12b		R-HSA-5671919
R-HSA-418038	Nucleotide-like (purinergic) receptors	2	23	0.00161166	0.503007	0.851808	2	15	0.00110481	9606	Homo sapiens	Adora2a;P2ry2		R-HSA-417927;R-HSA-418925
R-HSA-9679504	Translation of Replicase and Assembly of the Replication Transcription Complex	2	23	0.00161166	0.503007	0.851808	1	30	0.00220962	9606	Homo sapiens	Chmp4c		R-HSA-9687435
R-HSA-9662361	Sensory processing of sound by outer hair cells of the cochlea	5	64	0.00448462	0.504829	0.851808	1	8	0.000589232	9606	Homo sapiens	Tmie;Cib2;Myo3b;Eps8l2;Espn		R-HSA-9663363
R-HSA-8936459	RUNX1 regulates genes involved in megakaryocyte differentiation and platelet function	6	78	0.00546563	0.509118	0.851808	22	33	0.00243058	9606	Homo sapiens	Nfe2;Hist1h2ac;Hist1h4i;Setd1a		R-HSA-8936616;R-HSA-8936584;R-HSA-8937097;R-HSA-8937037;R-HSA-8936621;R-HSA-8936608;R-HSA-8936481;R-HSA-8938338;R-HSA-8936995;R-HSA-8937016;R-HSA-8938328;R-HSA-8937113;R-HSA-8937050;R-HSA-8935740;R-HSA-8936989;R-HSA-8937118;R-HSA-8937022;R-HSA-8935730;R-HSA-8936979;R-HSA-8935731;R-HSA-8936628;R-HSA-8936599
R-HSA-3906995	Diseases associated with O-glycosylation of proteins	6	78	0.00546563	0.509118	0.851808	5	9	0.000662886	9606	Homo sapiens	Adamts10;Sbspon;Dag1;Notch3;Thsd7a;Cfp		R-HSA-5615556;R-HSA-5615604;R-HSA-5096538;R-HSA-6785565;R-HSA-5617096
R-HSA-182971	EGFR downregulation	3	37	0.00259267	0.510153	0.851808	18	22	0.00162039	9606	Homo sapiens	Btc;Epgn;Sh3gl3		R-HSA-8867047;R-HSA-183072;R-HSA-8867044;R-HSA-8867041;R-HSA-182986;R-HSA-183051;R-HSA-8951490;R-HSA-182990;R-HSA-183055;R-HSA-183084;R-HSA-183058;R-HSA-182994;R-HSA-183089;R-HSA-182993;R-HSA-183002;R-HSA-183067;R-HSA-182969;R-HSA-183036
R-HSA-5694530	Cargo concentration in the ER	3	37	0.00259267	0.510153	0.851808	4	12	0.000883848	9606	Homo sapiens	Ctsc;Sec24d;F5		R-HSA-5694431;R-HSA-5694428;R-HSA-5694413;R-HSA-5694522
R-HSA-1500931	Cell-Cell communication	10	133	0.0093196	0.511857	0.851808	24	60	0.00441924	9606	Homo sapiens	Cadm3;Cldn3;Cdh15;Itgb4;Cldn7;Itga6;Pard6g;Pik3r1;Sirpa		R-HSA-420582;R-HSA-210274;R-HSA-446083;R-HSA-451758;R-HSA-391151;R-HSA-432909;R-HSA-419981;R-HSA-391150;R-HSA-420586;R-HSA-420584;R-HSA-446089;R-HSA-391157;R-HSA-391156;R-HSA-391158;R-HSA-391153;R-HSA-391152;R-HSA-420019;R-HSA-391155;R-HSA-420592;R-HSA-432956;R-HSA-446077;R-HSA-419002;R-HSA-432952;R-HSA-419001
R-HSA-110329	Cleavage of the damaged pyrimidine	4	51	0.00357368	0.514779	0.851808	4	20	0.00147308	9606	Homo sapiens	Hist1h2ac;Hist1h4i;Tdg;Trf		R-HSA-110219;R-HSA-110234;R-HSA-110218;R-HSA-9629497
R-HSA-73928	Depyrimidination	4	51	0.00357368	0.514779	0.851808	8	41	0.00301981	9606	Homo sapiens	Hist1h2ac;Hist1h4i;Tdg;Trf		R-HSA-110210;R-HSA-110219;R-HSA-110234;R-HSA-110218;R-HSA-9629497;R-HSA-110159;R-HSA-9629372;R-HSA-110158
R-HSA-2395516	Electron transport from NADPH to Ferredoxin	1	10	0.000700722	0.519973	0.851808	2	2	0.000147308	9606	Homo sapiens	Fdxr		R-HSA-2395517;R-HSA-2395512
R-HSA-111367	SLBP independent Processing of Histone Pre-mRNAs	1	10	0.000700722	0.519973	0.851808	2	2	0.000147308	9606	Homo sapiens	Snrpf		R-HSA-111437;R-HSA-111438
R-HSA-5666185	RHO GTPases Activate Rhotekin and Rhophilins	1	10	0.000700722	0.519973	0.851808	3	6	0.000441924	9606	Homo sapiens	Rtkn		R-HSA-5666197;R-HSA-5666178;R-HSA-5666216
R-HSA-419771	Opsins	1	10	0.000700722	0.519973	0.851808	1	2	0.000147308	9606	Homo sapiens	Opn1sw		R-HSA-419841
R-HSA-1369007	Mitochondrial ABC transporters	1	10	0.000700722	0.519973	0.851808	1	2	0.000147308	9606	Homo sapiens	Abcb6		R-HSA-1369065
R-HSA-8851907	MET activates PI3K/AKT signaling	1	10	0.000700722	0.519973	0.851808	2	5	0.00036827	9606	Homo sapiens	Pik3r1		R-HSA-8852019;R-HSA-8851954
R-HSA-9603381	Activated NTRK3 signals through PI3K	1	10	0.000700722	0.519973	0.851808	2	5	0.00036827	9606	Homo sapiens	Pik3r1		R-HSA-9603445;R-HSA-9603407
R-HSA-187015	Activation of TRKA receptors	1	10	0.000700722	0.519973	0.851808	2	8	0.000589232	9606	Homo sapiens	Adora2a		R-HSA-9613023;R-HSA-187661
R-HSA-209822	Glycoprotein hormones	1	10	0.000700722	0.519973	0.851808	1	4	0.000294616	9606	Homo sapiens	Inhba		R-HSA-378975
R-HSA-447041	CHL1 interactions	1	10	0.000700722	0.519973	0.851808	1	5	0.00036827	9606	Homo sapiens	Itga10		R-HSA-445088
R-HSA-110357	Displacement of DNA glycosylase by APEX1	1	10	0.000700722	0.519973	0.851808	1	8	0.000589232	9606	Homo sapiens	Tdg		R-HSA-110350
R-HSA-392851	Prostacyclin signalling through prostacyclin receptor	2	24	0.00168173	0.525584	0.851808	4	4	0.000294616	9606	Homo sapiens	Ptgir;Gngt2		R-HSA-392852;R-HSA-392870;R-HSA-391942;R-HSA-392874
R-HSA-174048	APC/C:Cdc20 mediated degradation of Cyclin B	2	24	0.00168173	0.525584	0.851808	3	3	0.000220962	9606	Homo sapiens	Apc2;Anapc10		R-HSA-174227;R-HSA-174120;R-HSA-174157
R-HSA-5627117	RHO GTPases Activate ROCKs	2	24	0.00168173	0.525584	0.851808	3	7	0.000515578	9606	Homo sapiens	Myh14;Ppp1r12b		R-HSA-419232;R-HSA-419197;R-HSA-419083
R-HSA-912631	Regulation of signaling by CBL	2	24	0.00168173	0.525584	0.851808	3	7	0.000515578	9606	Homo sapiens	Syk;Pik3r1		R-HSA-879917;R-HSA-912629;R-HSA-912627
R-HSA-844456	The NLRP3 inflammasome	2	24	0.00168173	0.525584	0.851808	4	18	0.00132577	9606	Homo sapiens	Pycard;Mefv		R-HSA-844612;R-HSA-879221;R-HSA-877361;R-HSA-844610
R-HSA-449836	Other interleukin signaling	2	24	0.00168173	0.525584	0.851808	3	17	0.00125212	9606	Homo sapiens	Prtn3;Csf3		R-HSA-8854738;R-HSA-448591;R-HSA-6787737
R-HSA-5683826	Surfactant metabolism	4	52	0.00364375	0.529884	0.851808	6	29	0.00213597	9606	Homo sapiens	Adora2a;Ctsd;Csf2rb;P2ry2		R-HSA-5686359;R-HSA-5684864;R-HSA-5684862;R-HSA-5685902;R-HSA-5686335;R-HSA-418925
R-HSA-9029569	NR1H3 & NR1H2 regulate gene expression linked to cholesterol transport and efflux	5	66	0.00462476	0.531735	0.851808	6	40	0.00294616	9606	Homo sapiens	Apc2;Arl4c		R-HSA-9618407;R-HSA-9618405;R-HSA-9031521;R-HSA-9618394;R-HSA-9618392;R-HSA-9031527
R-HSA-199992	trans-Golgi Network Vesicle Budding	6	80	0.00560577	0.533497	0.851808	9	19	0.00139943	9606	Homo sapiens	Ap1m2;Tfrc;Ap1s2;Sort1;Tpd52l1		R-HSA-421831;R-HSA-432706;R-HSA-432707;R-HSA-432688;R-HSA-421836;R-HSA-5333658;R-HSA-421835;R-HSA-432712;R-HSA-421833
R-HSA-446728	Cell junction organization	7	94	0.00658678	0.535183	0.851808	14	37	0.0027252	9606	Homo sapiens	Cadm3;Cldn3;Cdh15;Itgb4;Cldn7;Itga6;Pard6g		R-HSA-420582;R-HSA-446083;R-HSA-432909;R-HSA-419981;R-HSA-420586;R-HSA-420584;R-HSA-446089;R-HSA-420019;R-HSA-420592;R-HSA-432956;R-HSA-446077;R-HSA-419002;R-HSA-432952;R-HSA-419001
R-HSA-1474244	Extracellular matrix organization	24	329	0.0230537	0.539329	0.851808	101	319	0.0234956	9606	Homo sapiens	Itga10;Ctsd;Col23a1;Mmd;Col24a1;Eln;Dag1;Itgb7;Col8a2;Itga6;Bmp7;Tpsab1;Lama5;Vcam1;Tpsb2;Itgb4;Lama1;Itga4;Itgb2;Icam1;Cma1;Htra1;Fmod;Loxl4		R-HSA-2002460;R-HSA-2473511;R-HSA-216069;R-HSA-8944257;R-HSA-1564184;R-HSA-216082;R-HSA-2426676;R-HSA-2002440;R-HSA-1564169;R-HSA-198941;R-HSA-2466106;R-HSA-2482180;R-HSA-3788061;R-HSA-4084507;R-HSA-4084505;R-HSA-2002466;R-HSA-2537499;R-HSA-2514790;R-HSA-2467436;R-HSA-1980233;R-HSA-1592387;R-HSA-2752118;R-HSA-1650808;R-HSA-2328129;R-HSA-2213192;R-HSA-2731074;R-HSA-2327886;R-HSA-2213201;R-HSA-2328…
R-HSA-432040	Vasopressin regulates renal water homeostasis via Aquaporins	4	53	0.00371383	0.544755	0.851808	8	15	0.00110481	9606	Homo sapiens	Gngt2;Adcy2;Aqp3;Aqp1		R-HSA-432054;R-HSA-163617;R-HSA-445714;R-HSA-432195;R-HSA-422320;R-HSA-432188;R-HSA-164377;R-HSA-432010
R-HSA-3214858	RMTs methylate histone arginines	4	53	0.00371383	0.544755	0.851808	11	22	0.00162039	9606	Homo sapiens	Hist1h2ac;Hist1h4i;Smarca2;Art3		R-HSA-5661126;R-HSA-5205820;R-HSA-8879123;R-HSA-5205867;R-HSA-5216234;R-HSA-5205799;R-HSA-5212679;R-HSA-3215448;R-HSA-5205798;R-HSA-5205861;R-HSA-5229203
R-HSA-2172127	DAP12 interactions	4	53	0.00371383	0.544755	0.851808	12	33	0.00243058	9606	Homo sapiens	Syk;Klrc1;Pik3r1;Sirpa		R-HSA-2424484;R-HSA-2395412;R-HSA-210274;R-HSA-2424486;R-HSA-210289;R-HSA-2424487;R-HSA-2424480;R-HSA-2424482;R-HSA-2396594;R-HSA-2395439;R-HSA-2395801;R-HSA-2172126
R-HSA-421270	Cell-cell junction organization	5	67	0.00469484	0.54494	0.851808	8	21	0.00154673	9606	Homo sapiens	Cadm3;Cldn3;Cdh15;Cldn7;Pard6g		R-HSA-420582;R-HSA-420019;R-HSA-420592;R-HSA-419981;R-HSA-419002;R-HSA-420586;R-HSA-420584;R-HSA-419001
R-HSA-110330	Recognition and association of DNA glycosylase with site containing an affected purine	3	39	0.00273281	0.545295	0.851808	2	10	0.00073654	9606	Homo sapiens	Hist1h2ac;Hist1h4i;Trf		R-HSA-9629195;R-HSA-9629373
R-HSA-5620922	BBSome-mediated cargo-targeting to cilium	2	25	0.0017518	0.547458	0.851808	5	5	0.00036827	9606	Homo sapiens	Arl6;Bbs9		R-HSA-5617815;R-HSA-5624129;R-HSA-5624125;R-HSA-5624127;R-HSA-5624126
R-HSA-389513	CTLA4 inhibitory signaling	2	25	0.0017518	0.547458	0.851808	3	5	0.00036827	9606	Homo sapiens	Cd86;Cd80		R-HSA-388833;R-HSA-388829;R-HSA-388809
R-HSA-1181150	Signaling by NODAL	2	25	0.0017518	0.547458	0.851808	5	12	0.000883848	9606	Homo sapiens	Smad2;Foxo3		R-HSA-173488;R-HSA-1535903;R-HSA-1181355;R-HSA-1225919;R-HSA-170847
R-HSA-77111	Synthesis of Ketone Bodies	2	25	0.0017518	0.547458	0.851808	2	8	0.000589232	9606	Homo sapiens	Bdh2;Aacs		R-HSA-5694494;R-HSA-5696457
R-HSA-9694676	Translation of Replicase and Assembly of the Replication Transcription Complex	2	25	0.0017518	0.547458	0.851808	1	28	0.00206231	9606	Homo sapiens	Chmp4c		R-HSA-9698265
R-HSA-9028335	Activated NTRK2 signals through PI3K	1	11	0.000770794	0.553954	0.851808	2	2	0.000147308	9606	Homo sapiens	Pik3r1		R-HSA-9028505;R-HSA-9028519
R-HSA-196025	Formation of annular gap junctions	1	11	0.000770794	0.553954	0.851808	2	2	0.000147308	9606	Homo sapiens	Dab2		R-HSA-196017;R-HSA-196026
R-HSA-193634	Axonal growth inhibition (RHOA activation)	1	11	0.000770794	0.553954	0.851808	5	6	0.000441924	9606	Homo sapiens	Ngfr		R-HSA-9012761;R-HSA-193696;R-HSA-193655;R-HSA-209573;R-HSA-193636
R-HSA-77588	SLBP Dependent Processing of Replication-Dependent Histone Pre-mRNAs	1	11	0.000770794	0.553954	0.851808	2	3	0.000220962	9606	Homo sapiens	Snrpf		R-HSA-77585;R-HSA-77586
R-HSA-163680	AMPK inhibits chREBP transcriptional activation activity	1	11	0.000770794	0.553954	0.851808	2	4	0.000294616	9606	Homo sapiens	Adipor2		R-HSA-8848663;R-HSA-163691
R-HSA-9013419	RHOT2 GTPase cycle	1	11	0.000770794	0.553954	0.851808	1	3	0.000220962	9606	Homo sapiens	Myo19		R-HSA-9018824
R-HSA-444473	Formyl peptide receptors bind formyl peptides and many other ligands	1	11	0.000770794	0.553954	0.851808	1	3	0.000220962	9606	Homo sapiens	Fpr2		R-HSA-391913
R-HSA-425986	Sodium/Proton exchangers	1	11	0.000770794	0.553954	0.851808	1	4	0.000294616	9606	Homo sapiens	Slc9a4		R-HSA-425994
R-HSA-2219530	Constitutive Signaling by Aberrant PI3K in Cancer	7	96	0.00672693	0.557212	0.851808	2	2	0.000147308	9606	Homo sapiens	Btc;Cd86;Epgn;Cd80;Erbb3;Rac2;Pik3r1		R-HSA-2394007;R-HSA-2400009
R-HSA-1236394	Signaling by ERBB4	6	82	0.00574592	0.557352	0.851808	14	52	0.00383001	9606	Homo sapiens	Btc;Wwox;Gabrb3;Erbb3;Pik3r1		R-HSA-1250353;R-HSA-1250357;R-HSA-1251992;R-HSA-1253343;R-HSA-9612639;R-HSA-1250370;R-HSA-1250315;R-HSA-1977958;R-HSA-1977959;R-HSA-1250383;R-HSA-1236398;R-HSA-1250380;R-HSA-1250348;R-HSA-1250220
R-HSA-8873719	RAB geranylgeranylation	5	68	0.00476491	0.557965	0.851808	2	5	0.00036827	9606	Homo sapiens	Rab31;Rab24;Rab15;Rab8b;Rab6b		R-HSA-8870469;R-HSA-8870466
R-HSA-179409	APC-Cdc20 mediated degradation of Nek2A	2	26	0.00182188	0.568614	0.851808	3	3	0.000220962	9606	Homo sapiens	Apc2;Anapc10		R-HSA-179410;R-HSA-179417;R-HSA-179421
R-HSA-5602498	MyD88 deficiency (TLR2/4)	2	26	0.00182188	0.568614	0.851808	2	2	0.000147308	9606	Homo sapiens	Mal;S100a9		R-HSA-5602383;R-HSA-5602606
R-HSA-202040	G-protein activation	2	26	0.00182188	0.568614	0.851808	5	6	0.000441924	9606	Homo sapiens	Gngt2;44808		R-HSA-167408;R-HSA-167429;R-HSA-167419;R-HSA-167433;R-HSA-112271
R-HSA-1368082	RORA activates gene expression	2	26	0.00182188	0.568614	0.851808	2	4	0.000294616	9606	Homo sapiens	Cpt1a		R-HSA-5663264;R-HSA-1801587
R-HSA-210991	Basigin interactions	2	26	0.00182188	0.568614	0.851808	2	10	0.00073654	9606	Homo sapiens	Atp1b2;Itga6		R-HSA-204434;R-HSA-375133
R-HSA-917937	Iron uptake and transport	6	83	0.00581599	0.569065	0.851808	9	34	0.00250424	9606	Homo sapiens	Tfrc;Tcirg1;Atp6v0c;Atp6v0d2;Atp6v0e2		R-HSA-5690886;R-HSA-917839;R-HSA-917807;R-HSA-5691154;R-HSA-5252133;R-HSA-917835;R-HSA-917814;R-HSA-917987;R-HSA-917841
R-HSA-445717	Aquaporin-mediated transport	5	69	0.00483498	0.570802	0.851808	13	25	0.00184135	9606	Homo sapiens	Gngt2;Adcy2;Aqp3;Aqp1		R-HSA-163617;R-HSA-432195;R-HSA-432074;R-HSA-432010;R-HSA-432054;R-HSA-445714;R-HSA-422320;R-HSA-507871;R-HSA-507870;R-HSA-507869;R-HSA-432188;R-HSA-164377;R-HSA-507868
R-HSA-1660499	Synthesis of PIPs at the plasma membrane	5	69	0.00483498	0.570802	0.851808	5	33	0.00243058	9606	Homo sapiens	Pi4k2b;Plekha4;Pik3r6;Pik3r1;Ptpn13		R-HSA-1676109;R-HSA-1676048;R-HSA-8870332;R-HSA-1675780;R-HSA-8870489
R-HSA-9613354	Lipophagy	1	12	0.000840866	0.585531	0.851808	5	5	0.00036827	9606	Homo sapiens	Plin2		R-HSA-9613666;R-HSA-9613530;R-HSA-9613352;R-HSA-9613513;R-HSA-9613565
R-HSA-193692	Regulated proteolysis of p75NTR	1	12	0.000840866	0.585531	0.851808	5	5	0.00036827	9606	Homo sapiens	Ngfr		R-HSA-193682;R-HSA-193702;R-HSA-193700;R-HSA-193679;R-HSA-209532
R-HSA-190873	Gap junction degradation	1	12	0.000840866	0.585531	0.851808	4	4	0.000294616	9606	Homo sapiens	Dab2		R-HSA-196017;R-HSA-190519;R-HSA-196026;R-HSA-190829
R-HSA-9700645	ALK mutants bind TKIs	1	12	0.000840866	0.585531	0.851808	1	1	7.3654e-05	9606	Homo sapiens	Hip1		R-HSA-9700131
R-HSA-193697	p75NTR regulates axonogenesis	1	12	0.000840866	0.585531	0.851808	7	8	0.000589232	9606	Homo sapiens	Ngfr		R-HSA-9012761;R-HSA-193696;R-HSA-193655;R-HSA-209573;R-HSA-193636;R-HSA-193668;R-HSA-193646
R-HSA-8866427	VLDLR internalisation and degradation	1	12	0.000840866	0.585531	0.851808	3	4	0.000294616	9606	Homo sapiens	Pcsk9		R-HSA-8855111;R-HSA-8855131;R-HSA-8855130
R-HSA-5250968	Toxicity of botulinum toxin type A (botA)	1	12	0.000840866	0.585531	0.851808	3	5	0.00036827	9606	Homo sapiens	Sv2c		R-HSA-5244424;R-HSA-5244428;R-HSA-5244415
R-HSA-433692	Proton-coupled monocarboxylate transport	1	12	0.000840866	0.585531	0.851808	1	2	0.000147308	9606	Homo sapiens	Slc16a7		R-HSA-433698
R-HSA-9715370	Miro GTPase Cycle	1	12	0.000840866	0.585531	0.851808	2	6	0.000441924	9606	Homo sapiens	Myo19		R-HSA-9018824;R-HSA-9018815
R-HSA-198693	AKT phosphorylates targets in the nucleus	1	12	0.000840866	0.585531	0.851808	1	4	0.000294616	9606	Homo sapiens	Foxo3		R-HSA-199299
R-HSA-8866907	Activation of the TFAP2 (AP-2) family of transcription factors	1	12	0.000840866	0.585531	0.851808	1	4	0.000294616	9606	Homo sapiens	Wwox		R-HSA-8864577
R-HSA-8853383	Lysosomal oligosaccharide catabolism	1	12	0.000840866	0.585531	0.851808	1	5	0.00036827	9606	Homo sapiens	Man2b1		R-HSA-8853686
R-HSA-428542	Regulation of commissural axon pathfinding by SLIT and ROBO	1	12	0.000840866	0.585531	0.851808	1	5	0.00036827	9606	Homo sapiens	Nrp2		R-HSA-9010190
R-HSA-430116	GP1b-IX-V activation signalling	1	12	0.000840866	0.585531	0.851808	1	7	0.000515578	9606	Homo sapiens	Pik3r1		R-HSA-443402
R-HSA-450520	HuR (ELAVL1) binds and stabilizes mRNA	1	12	0.000840866	0.585531	0.851808	1	7	0.000515578	9606	Homo sapiens	Enpp2		R-HSA-450595
R-HSA-8851680	Butyrophilin (BTN) family interactions	1	12	0.000840866	0.585531	0.851808	1	8	0.000589232	9606	Homo sapiens	Cd209a		R-HSA-8851018
R-HSA-5603041	IRAK4 deficiency (TLR2/4)	2	27	0.00189195	0.589045	0.851808	2	2	0.000147308	9606	Homo sapiens	Mal;S100a9		R-HSA-5602353;R-HSA-5602672
R-HSA-9617828	FOXO-mediated transcription of cell cycle genes	2	27	0.00189195	0.589045	0.851808	20	22	0.00162039	9606	Homo sapiens	Smad2;Foxo3		R-HSA-9620915;R-HSA-9625520;R-HSA-9617840;R-HSA-9624976;R-HSA-9618004;R-HSA-9620788;R-HSA-9620891;R-HSA-9617848;R-HSA-9624985;R-HSA-9625406;R-HSA-9617852;R-HSA-9620828;R-HSA-9617853;R-HSA-9625409;R-HSA-9625510;R-HSA-9618021;R-HSA-9620837;R-HSA-9617838;R-HSA-9617996;R-HSA-9620813
R-HSA-9705462	Inactivation of CSF3 (G-CSF) signaling	2	27	0.00189195	0.589045	0.851808	5	9	0.000662886	9606	Homo sapiens	Syk;Csf3		R-HSA-9705729;R-HSA-9705726;R-HSA-9707977;R-HSA-9705738;R-HSA-9705467
R-HSA-947581	Molybdenum cofactor biosynthesis	2	27	0.00189195	0.589045	0.851808	3	6	0.000441924	9606	Homo sapiens	Mocs3;Mal		R-HSA-947514;R-HSA-947499;R-HSA-947538
R-HSA-211958	Miscellaneous substrates	2	27	0.00189195	0.589045	0.851808	2	5	0.00036827	9606	Homo sapiens	Cyp2s1;Cyp4b1		R-HSA-211874;R-HSA-211962
R-HSA-9024446	NR1H2 and NR1H3-mediated signaling	6	85	0.00595613	0.592025	0.851808	7	60	0.00441924	9606	Homo sapiens	Apc2;Arl4c;Ccdc57		R-HSA-9605063;R-HSA-9618407;R-HSA-9618405;R-HSA-9031521;R-HSA-9618394;R-HSA-9618392;R-HSA-9031527
R-HSA-8964043	Plasma lipoprotein clearance	3	42	0.00294303	0.595135	0.851808	16	35	0.00257789	9606	Homo sapiens	Lipc;Pcsk9;Ldlr		R-HSA-8855111;R-HSA-171106;R-HSA-174624;R-HSA-174657;R-HSA-6784738;R-HSA-171141;R-HSA-171087;R-HSA-174706;R-HSA-171122;R-HSA-171059;R-HSA-6784735;R-HSA-6784734;R-HSA-174808;R-HSA-8855131;R-HSA-8855130;R-HSA-6784729
R-HSA-5602358	Diseases associated with the TLR signaling cascade	3	42	0.00294303	0.595135	0.851808	5	15	0.00110481	9606	Homo sapiens	Unc93b1;Mal;S100a9		R-HSA-5602353;R-HSA-5602672;R-HSA-5602383;R-HSA-5602606;R-HSA-5607838
R-HSA-5260271	Diseases of Immune System	3	42	0.00294303	0.595135	0.851808	5	15	0.00110481	9606	Homo sapiens	Unc93b1;Mal;S100a9		R-HSA-5602353;R-HSA-5602672;R-HSA-5602383;R-HSA-5602606;R-HSA-5607838
R-HSA-373755	Semaphorin interactions	5	71	0.00497512	0.595881	0.851808	19	41	0.00301981	9606	Homo sapiens	Farp2;Myh14;Pak3;Plxnc1;Plxna1		R-HSA-399942;R-HSA-399941;R-HSA-399938;R-HSA-399939;R-HSA-399936;R-HSA-399951;R-HSA-434989;R-HSA-399946;R-HSA-399947;R-HSA-399944;R-HSA-416725;R-HSA-399952;R-HSA-399934;R-HSA-399935;R-HSA-419197;R-HSA-399933;R-HSA-399930;R-HSA-399931;R-HSA-399928
R-HSA-936837	Ion transport by P-type ATPases	5	71	0.00497512	0.595881	0.851808	5	16	0.00117846	9606	Homo sapiens	Fxyd3;Atp1b2;Atp2b4;Atp1a3;Atp10d		R-HSA-418309;R-HSA-9684068;R-HSA-947591;R-HSA-939763;R-HSA-936897
R-HSA-9013423	RAC3 GTPase cycle	7	100	0.00700722	0.599805	0.851808	3	6	0.000441924	9606	Homo sapiens	Tfrc;Ncf1;Ophn1;Ncf4;Vrk2;Pik3r1;Pak4		R-HSA-9018808;R-HSA-9714691;R-HSA-9018806
R-HSA-9013405	RHOD GTPase cycle	4	57	0.00399411	0.601665	0.851808	3	9	0.000662886	9606	Homo sapiens	Cpne8;Vrk2;Pik3r1;Plxna1		R-HSA-9013437;R-HSA-9693214;R-HSA-9693198
R-HSA-532668	N-glycan trimming in the ER and Calnexin/Calreticulin cycle	4	57	0.00399411	0.601665	0.851808	3	18	0.00132577	9606	Homo sapiens	C1qtnf1;Syvn1;Trim13;Derl1		R-HSA-8853379;R-HSA-8850594;R-HSA-8867288
R-HSA-196071	Metabolism of steroid hormones	5	72	0.0050452	0.608109	0.851808	13	40	0.00294616	9606	Homo sapiens	Stard4;Star;44808;Rbp1;Fdxr;Tmem221		R-HSA-8951850;R-HSA-9705713;R-HSA-9705714;R-HSA-193064;R-HSA-193065;R-HSA-193070;R-HSA-193997;R-HSA-193101;R-HSA-193073;R-HSA-196086;R-HSA-196126;R-HSA-469659;R-HSA-193054
R-HSA-429947	Deadenylation of mRNA	2	28	0.00196202	0.608748	0.851808	4	4	0.000294616	9606	Homo sapiens	Eif4a2;Tifa		R-HSA-430021;R-HSA-429955;R-HSA-8941312;R-HSA-429992
R-HSA-350054	Notch-HLH transcription pathway	2	28	0.00196202	0.608748	0.851808	2	2	0.000147308	9606	Homo sapiens	Notch3;Hdac6		R-HSA-212356;R-HSA-350058
R-HSA-6803529	FGFR2 alternative splicing	2	28	0.00196202	0.608748	0.851808	3	4	0.000294616	9606	Homo sapiens	Esrp2;Esrp1		R-HSA-6803527;R-HSA-6803838;R-HSA-6803836
R-HSA-8964038	LDL clearance	2	28	0.00196202	0.608748	0.851808	9	19	0.00139943	9606	Homo sapiens	Pcsk9;Ldlr		R-HSA-171122;R-HSA-171106;R-HSA-171059;R-HSA-6784738;R-HSA-171141;R-HSA-6784735;R-HSA-6784734;R-HSA-171087;R-HSA-6784729
R-HSA-2173788	Downregulation of TGF-beta receptor signaling	2	28	0.00196202	0.608748	0.851808	8	28	0.00206231	9606	Homo sapiens	Smad2;Bambi		R-HSA-173542;R-HSA-2176452;R-HSA-2187401;R-HSA-173483;R-HSA-2187355;R-HSA-2176445;R-HSA-2187405;R-HSA-2187358
R-HSA-112409	RAF-independent MAPK1/3 activation	2	28	0.00196202	0.608748	0.851808	2	12	0.000883848	9606	Homo sapiens	Dusp2;Dusp8		R-HSA-5675376;R-HSA-5675373
R-HSA-6803205	TP53 regulates transcription of several additional cell death genes whose specific roles in p53-dependent apoptosis remain uncertain	2	28	0.00196202	0.608748	0.851808	2	19	0.00139943	9606	Homo sapiens	Perp		R-HSA-6800836;R-HSA-6800816
R-HSA-8853659	RET signaling	3	43	0.0030131	0.610936	0.851808	22	24	0.0017677	9606	Homo sapiens	Dok2;Gfra1;Pik3r1		R-HSA-8853734;R-HSA-8854981;R-HSA-8855747;R-HSA-8853762;R-HSA-8855617;R-HSA-8853793;R-HSA-8853792;R-HSA-8853774;R-HSA-8855564;R-HSA-8855915;R-HSA-8853737;R-HSA-8853800;R-HSA-8855508;R-HSA-8854899;R-HSA-8854897;R-HSA-8853745;R-HSA-8853789;R-HSA-8854908;R-HSA-8853755;R-HSA-8871226;R-HSA-8853753;R-HSA-8854905
R-HSA-8941326	RUNX2 regulates bone development	3	43	0.0030131	0.610936	0.851808	29	32	0.00235693	9606	Homo sapiens	Hdac6;Runx2		R-HSA-9008137;R-HSA-8937864;R-HSA-8878023;R-HSA-8985227;R-HSA-8939852;R-HSA-8985485;R-HSA-8937869;R-HSA-8877902;R-HSA-9008389;R-HSA-9008326;R-HSA-8985627;R-HSA-8939870;R-HSA-8877918;R-HSA-9008215;R-HSA-9008877;R-HSA-8877922;R-HSA-8985644;R-HSA-8984994;R-HSA-9009208;R-HSA-8985275;R-HSA-8877941;R-HSA-8878257;R-HSA-9008177;R-HSA-8878013;R-HSA-2064932;R-HSA-8938356;R-HSA-8985460;R-HSA-8878266;R-HSA-8…
R-HSA-432720	Lysosome Vesicle Biogenesis	3	43	0.0030131	0.610936	0.851808	5	8	0.000589232	9606	Homo sapiens	Ap1m2;Ap1s2		R-HSA-432706;R-HSA-432707;R-HSA-432688;R-HSA-5333658;R-HSA-432712
R-HSA-3371511	HSF1 activation	3	43	0.0030131	0.610936	0.851808	2	7	0.000515578	9606	Homo sapiens	Hsph1;Cryba4;Hdac6		R-HSA-4793819;R-HSA-5324632
R-HSA-9668250	Defective factor IX causes hemophilia B	1	13	0.000910938	0.614875	0.851808	4	4	0.000294616	9606	Homo sapiens	F9		R-HSA-9673223;R-HSA-9670874;R-HSA-9670888;R-HSA-9673231
R-HSA-211994	Sterols are 12-hydroxylated by CYP8B1	1	13	0.000910938	0.614875	0.851808	3	3	0.000220962	9606	Homo sapiens	Ptgis		R-HSA-193845;R-HSA-192157;R-HSA-193709
R-HSA-173107	Binding and entry of HIV virion	1	13	0.000910938	0.614875	0.851808	6	8	0.000589232	9606	Homo sapiens	Ccr5		R-HSA-164515;R-HSA-164500;R-HSA-164507;R-HSA-164521;R-HSA-164524;R-HSA-164508
R-HSA-5221030	TET1,2,3 and TDG demethylate DNA	1	13	0.000910938	0.614875	0.851808	2	5	0.00036827	9606	Homo sapiens	Tdg		R-HSA-5220959;R-HSA-5221061
R-HSA-6799990	Metal sequestration by antimicrobial proteins	1	13	0.000910938	0.614875	0.851808	2	5	0.00036827	9606	Homo sapiens	S100a9		R-HSA-6798528;R-HSA-6798474
R-HSA-198203	PI3K/AKT activation	1	13	0.000910938	0.614875	0.851808	2	5	0.00036827	9606	Homo sapiens	Pik3r1		R-HSA-198315;R-HSA-198266
R-HSA-5578768	Physiological factors	1	13	0.000910938	0.614875	0.851808	1	4	0.000294616	9606	Homo sapiens	Gata4		R-HSA-2032800
R-HSA-1296346	Tandem pore domain potassium channels	1	13	0.000910938	0.614875	0.851808	1	6	0.000441924	9606	Homo sapiens	Kcnk2		R-HSA-1296348
R-HSA-9660821	ADORA2B mediated anti-inflammatory cytokines production	11	159	0.0111415	0.617744	0.851808	5	12	0.000883848	9606	Homo sapiens	Vipr2;Adora2a;Gpr25;Ptgir;Vipr1;Gngt2;Ptger2;44808;Adcy2;Pthlh		R-HSA-9660819;R-HSA-163617;R-HSA-392129;R-HSA-9660824;R-HSA-9660828
R-HSA-6806834	Signaling by MET	6	88	0.00616635	0.625217	0.851808	6	51	0.00375635	9606	Homo sapiens	Lama5;Sh3gl3;Lama1;Col24a1;Pik3r1;Hgfac		R-HSA-8852019;R-HSA-8875490;R-HSA-8851954;R-HSA-8874079;R-HSA-6800299;R-HSA-8875482
R-HSA-212300	PRC2 methylates histones and DNA	3	44	0.00308318	0.626318	0.851808	4	4	0.000294616	9606	Homo sapiens	Hist1h2ac;Hist1h4i;Phf1		R-HSA-212263;R-HSA-212222;R-HSA-212269;R-HSA-212252
R-HSA-912526	Interleukin receptor SHC signaling	2	29	0.00203209	0.627722	0.851808	6	6	0.000441924	9606	Homo sapiens	Csf2rb;Pik3r1		R-HSA-508247;R-HSA-453111;R-HSA-912527;R-HSA-913374;R-HSA-453104;R-HSA-913424
R-HSA-392451	G beta:gamma signalling through PI3Kgamma	2	29	0.00203209	0.627722	0.851808	2	4	0.000294616	9606	Homo sapiens	Gngt2;Pik3r6		R-HSA-392295;R-HSA-392300
R-HSA-74182	Ketone body metabolism	2	29	0.00203209	0.627722	0.851808	2	11	0.000810194	9606	Homo sapiens	Bdh2;Aacs		R-HSA-5694494;R-HSA-5696457
R-HSA-1369062	ABC transporters in lipid homeostasis	2	29	0.00203209	0.627722	0.851808	2	11	0.000810194	9606	Homo sapiens	Abcd2		R-HSA-382613;R-HSA-382575
R-HSA-9648895	Response of EIF2AK1 (HRI) to heme deficiency	2	29	0.00203209	0.627722	0.851808	2	20	0.00147308	9606	Homo sapiens	Chac1		R-HSA-9653894;R-HSA-9653893
R-HSA-3000170	Syndecan interactions	2	29	0.00203209	0.627722	0.851808	1	15	0.00110481	9606	Homo sapiens	Itgb4;Itga6		R-HSA-2731074
R-HSA-1474290	Collagen formation	7	104	0.00728751	0.640181	0.851808	34	77	0.00567136	9606	Homo sapiens	Itgb4;Col23a1;Col24a1;Col8a2;Itga6;Loxl4		R-HSA-8948232;R-HSA-2002460;R-HSA-8948234;R-HSA-8948224;R-HSA-8944257;R-HSA-8948226;R-HSA-1474266;R-HSA-8948228;R-HSA-8948230;R-HSA-8948231;R-HSA-8944218;R-HSA-8944220;R-HSA-2002440;R-HSA-1981128;R-HSA-1980233;R-HSA-1981120;R-HSA-1650808;R-HSA-2002428;R-HSA-2022141;R-HSA-2022073;R-HSA-2395340;R-HSA-2213192;R-HSA-2089971;R-HSA-8944229;R-HSA-1981104;R-HSA-8944230;R-HSA-2213201;R-HSA-8948219;R-HSA-2…
R-HSA-427359	SIRT1 negatively regulates rRNA expression	3	45	0.00315325	0.641277	0.851808	4	5	0.00036827	9606	Homo sapiens	Hist1h2ac;Taf1d;Hist1h4i		R-HSA-427527;R-HSA-5211239;R-HSA-427514;R-HSA-427528
R-HSA-110331	Cleavage of the damaged purine	3	45	0.00315325	0.641277	0.851808	2	9	0.000662886	9606	Homo sapiens	Hist1h2ac;Hist1h4i;Trf		R-HSA-9629216;R-HSA-9629483
R-HSA-8875878	MET promotes cell motility	3	45	0.00315325	0.641277	0.851808	1	12	0.000883848	9606	Homo sapiens	Lama5;Lama1;Col24a1		R-HSA-8874079
R-HSA-9645460	Alpha-protein kinase 1 signaling pathway	1	14	0.00098101	0.642143	0.851808	9	10	0.00073654	9606	Homo sapiens	Tifa		R-HSA-9645442;R-HSA-9645394;R-HSA-9645520;R-HSA-9645414;R-HSA-9645524;R-HSA-9645481;R-HSA-9645535;R-HSA-9645406;R-HSA-9645501
R-HSA-190377	FGFR2b ligand binding and activation	1	14	0.00098101	0.642143	0.851808	2	3	0.000220962	9606	Homo sapiens	Fgfbp1		R-HSA-5656070;R-HSA-190260
R-HSA-9664535	LTC4-CYSLTR mediated IL4 production	1	14	0.00098101	0.642143	0.851808	2	3	0.000220962	9606	Homo sapiens	Ggt1		R-HSA-9664306;R-HSA-266046
R-HSA-9614399	Regulation of localization of FOXO transcription factors	1	14	0.00098101	0.642143	0.851808	3	5	0.00036827	9606	Homo sapiens	Foxo3		R-HSA-199299;R-HSA-9614562;R-HSA-9614414
R-HSA-6807047	Cholesterol biosynthesis via desmosterol	1	14	0.00098101	0.642143	0.851808	1	4	0.000294616	9606	Homo sapiens	Dhcr7		R-HSA-196402
R-HSA-6807062	Cholesterol biosynthesis via lathosterol	1	14	0.00098101	0.642143	0.851808	1	4	0.000294616	9606	Homo sapiens	Dhcr7		R-HSA-6807055
R-HSA-1483248	Synthesis of PIPs at the ER membrane	1	14	0.00098101	0.642143	0.851808	1	5	0.00036827	9606	Homo sapiens	Pi4k2b		R-HSA-1675813
R-HSA-8963888	Chylomicron assembly	1	14	0.00098101	0.642143	0.851808	1	5	0.00036827	9606	Homo sapiens	Apc2		R-HSA-174660
R-HSA-75205	Dissolution of Fibrin Clot	1	14	0.00098101	0.642143	0.851808	3	19	0.00139943	9606	Homo sapiens	Serpine2		R-HSA-158800;R-HSA-158795;R-HSA-159005
R-HSA-9020558	Interleukin-2 signaling	1	14	0.00098101	0.642143	0.851808	2	19	0.00139943	9606	Homo sapiens	Syk		R-HSA-508292;R-HSA-508282
R-HSA-1474228	Degradation of the extracellular matrix	10	148	0.0103707	0.644972	0.851808	13	105	0.00773367	9606	Homo sapiens	Lama5;Ctsd;Tpsb2;Col23a1;Mmd;Eln;Col24a1;Cma1;Col8a2;Htra1;Tpsab1		R-HSA-2514790;R-HSA-2471621;R-HSA-2482180;R-HSA-3788061;R-HSA-1592316;R-HSA-1566962;R-HSA-1564184;R-HSA-1454757;R-HSA-2172405;R-HSA-2533874;R-HSA-8855825;R-HSA-2537499;R-HSA-1564169
R-HSA-204174	Regulation of pyruvate dehydrogenase (PDH) complex	2	30	0.00210217	0.645973	0.851808	2	4	0.000294616	9606	Homo sapiens	Pdk4;Pkp1		R-HSA-203946;R-HSA-9011543
R-HSA-9665686	Signaling by ERBB2 TMD/JMD mutants	2	30	0.00210217	0.645973	0.851808	6	13	0.000957502	9606	Homo sapiens	Btc;Erbb3		R-HSA-9665699;R-HSA-9665697;R-HSA-9665701;R-HSA-9665700;R-HSA-9665705;R-HSA-9665709
R-HSA-5621575	CD209 (DC-SIGN) signaling	2	30	0.00210217	0.645973	0.851808	5	11	0.000810194	9606	Homo sapiens	Cd209a;Pak3		R-HSA-5621573;R-HSA-5621606;R-HSA-5621571;R-HSA-5624492;R-HSA-5621615
R-HSA-9639288	Amino acids regulate mTORC1	4	61	0.0042744	0.654057	0.851808	8	12	0.000883848	9606	Homo sapiens	Tcirg1;Atp6v0c;Atp6v0d2;Atp6v0e2		R-HSA-9640195;R-HSA-9640167;R-HSA-9639286;R-HSA-9646468;R-HSA-9640168;R-HSA-9645608;R-HSA-9640175;R-HSA-9645598
R-HSA-1566948	Elastic fibre formation	3	46	0.00322332	0.65581	0.851808	7	17	0.00125212	9606	Homo sapiens	Eln;Bmp7;Loxl4		R-HSA-2161282;R-HSA-2328048;R-HSA-2129353;R-HSA-1592387;R-HSA-2396399;R-HSA-2161293;R-HSA-2129375
R-HSA-73927	Depurination	3	46	0.00322332	0.65581	0.851808	4	19	0.00139943	9606	Homo sapiens	Hist1h2ac;Hist1h4i;Trf		R-HSA-9629216;R-HSA-9629483;R-HSA-9629195;R-HSA-9629373
R-HSA-2559582	Senescence-Associated Secretory Phenotype (SASP)	6	91	0.00637657	0.656801	0.851808	10	22	0.00162039	9606	Homo sapiens	Hist1h2ac;Apc2;Anapc10;Hist1h4i;Igfbp7		R-HSA-3790137;R-HSA-3788745;R-HSA-3788748;R-HSA-3797196;R-HSA-3788705;R-HSA-3790130;R-HSA-3797202;R-HSA-3788725;R-HSA-3788724;R-HSA-3788708
R-HSA-3296469	Defects in cobalamin (B12) metabolism	2	31	0.00217224	0.663508	0.851808	3	15	0.00110481	9606	Homo sapiens	Tcn2;Mmab		R-HSA-3325546;R-HSA-3299657;R-HSA-3322125
R-HSA-110362	POLB-Dependent Long Patch Base Excision Repair	1	15	0.00105108	0.667482	0.851808	5	10	0.00073654	9606	Homo sapiens	Parp2		R-HSA-5651828;R-HSA-5649873;R-HSA-5651723;R-HSA-5649883;R-HSA-5651739
R-HSA-209560	NF-kB is activated and signals survival	1	15	0.00105108	0.667482	0.851808	2	4	0.000294616	9606	Homo sapiens	Ngfr		R-HSA-193703;R-HSA-193705
R-HSA-3000497	Scavenging by Class H Receptors	1	15	0.00105108	0.667482	0.851808	2	4	0.000294616	9606	Homo sapiens	Stab1		R-HSA-2247513;R-HSA-2197770
R-HSA-5685939	HDR through MMEJ (alt-NHEJ)	1	15	0.00105108	0.667482	0.851808	3	8	0.000589232	9606	Homo sapiens	Parp2		R-HSA-5687653;R-HSA-5687484;R-HSA-5687640
R-HSA-418359	Reduction of cytosolic Ca++ levels	1	15	0.00105108	0.667482	0.851808	1	3	0.000220962	9606	Homo sapiens	Atp2b4		R-HSA-418309
R-HSA-425561	Sodium/Calcium exchangers	1	15	0.00105108	0.667482	0.851808	1	4	0.000294616	9606	Homo sapiens	Slc24a5		R-HSA-5626316
R-HSA-8983711	OAS antiviral response	1	15	0.00105108	0.667482	0.851808	3	15	0.00110481	9606	Homo sapiens	Oas2		R-HSA-8985097;R-HSA-8985104;R-HSA-8985138
R-HSA-1296071	Potassium Channels	7	107	0.00749772	0.668861	0.851808	6	19	0.00139943	9606	Homo sapiens	Gngt2;Kcnk2;Kcnj14;Kcnj9;Kcnb1		R-HSA-1013020;R-HSA-1013013;R-HSA-1013012;R-HSA-1296127;R-HSA-1296046;R-HSA-1296348
R-HSA-451927	Interleukin-2 family signaling	3	47	0.00329339	0.669914	0.851808	8	59	0.00434558	9606	Homo sapiens	Syk;Csf2rb;Pik3r1		R-HSA-508247;R-HSA-453111;R-HSA-912527;R-HSA-508292;R-HSA-913374;R-HSA-453104;R-HSA-508282;R-HSA-913424
R-HSA-9013406	RHOQ GTPase cycle	4	63	0.00441455	0.678453	0.851808	2	5	0.00036827	9606	Homo sapiens	Cpne8;Tfrc;Ophn1;Pak4		R-HSA-9018745;R-HSA-9018746
R-HSA-73929	Base-Excision Repair, AP Site Formation	4	63	0.00441455	0.678453	0.851808	12	64	0.00471385	9606	Homo sapiens	Hist1h2ac;Hist1h4i;Tdg;Trf		R-HSA-9629216;R-HSA-110210;R-HSA-9629483;R-HSA-9629195;R-HSA-110219;R-HSA-110218;R-HSA-9629497;R-HSA-110234;R-HSA-110159;R-HSA-9629372;R-HSA-110158;R-HSA-9629373
R-HSA-525793	Myogenesis	2	32	0.00224231	0.680337	0.851808	8	14	0.00103116	9606	Homo sapiens	Cdh15;Map2k6		R-HSA-376117;R-HSA-448951;R-HSA-375140;R-HSA-376119;R-HSA-449200;R-HSA-448958;R-HSA-448957;R-HSA-376121
R-HSA-6809371	Formation of the cornified envelope	9	138	0.00966996	0.682151	0.851808	12	27	0.00198866	9606	Homo sapiens	Dsp;Cdsn;Krt17;Perp;Pkp2;Pkp1;Pkp3;Evpl		R-HSA-6814695;R-HSA-6810357;R-HSA-6814387;R-HSA-6811539;R-HSA-8942224;R-HSA-6814734;R-HSA-6810894;R-HSA-6814764;R-HSA-6814187;R-HSA-6810843;R-HSA-6814298;R-HSA-6810937
R-HSA-9670095	Inhibition of DNA recombination at telomere	3	48	0.00336346	0.683589	0.851808	3	4	0.000294616	9606	Homo sapiens	Hist1h2ac;Hist1h4i;Trf		R-HSA-9670114;R-HSA-9670149;R-HSA-9670101
R-HSA-9607240	FLT3 Signaling	3	48	0.00336346	0.683589	0.851808	9	43	0.00316712	9606	Homo sapiens	Syk;Pik3r1;Foxo3		R-HSA-9706340;R-HSA-9699574;R-HSA-9699575;R-HSA-9706336;R-HSA-9699581;R-HSA-9698170;R-HSA-9607224;R-HSA-9706345;R-HSA-9699579
R-HSA-373076	Class A/1 (Rhodopsin-like receptors)	28	412	0.0288697	0.684846	0.851808	24	160	0.0117846	9606	Homo sapiens	Ccr1;Adora2a;Opn1sw;Pmch;Cxcr1;C5ar2;Cxcr2;C5ar1;Ackr4;Aplnr;Fpr2;Ccl17;Cort;Ccr10;Ptgir;Pnp;Ptger2;44808;P2ry2;Gpr35;F2rl1;Cxcl1;Ccr5;Cxcl5		R-HSA-373061;R-HSA-417927;R-HSA-391940;R-HSA-391942;R-HSA-374758;R-HSA-374337;R-HSA-964811;R-HSA-375395;R-HSA-419841;R-HSA-418925;R-HSA-443978;R-HSA-391913;R-HSA-373813;R-HSA-388596;R-HSA-389463;R-HSA-6805205;R-HSA-373073;R-HSA-443986;R-HSA-947673;R-HSA-388605;R-HSA-373791;R-HSA-388863;R-HSA-373086;R-HSA-374298
R-HSA-8876198	RAB GEFs exchange GTP for GDP on RABs	6	94	0.00658678	0.686684	0.851808	5	21	0.00154673	9606	Homo sapiens	Rab31;Dennd4a;Rinl;Rab8b;Rin1;Rab6b		R-HSA-8876193;R-HSA-8877311;R-HSA-8876190;R-HSA-8876188;R-HSA-8875320
R-HSA-8957275	Post-translational protein phosphorylation	7	109	0.00763787	0.687176	0.851808	1	1	7.3654e-05	9606	Homo sapiens	Igfbp4;Notum;Pcsk9;Sparcl1;Igfbp7;Fam20c;F5		R-HSA-8952289
R-HSA-975634	Retinoid metabolism and transport	5	79	0.0055357	0.687406	0.851808	12	28	0.00206231	9606	Homo sapiens	Apc2;Rdh11;Rbp1;Ldlr;Lrp8		R-HSA-2855259;R-HSA-975629;R-HSA-2404144;R-HSA-2404131;R-HSA-2404140;R-HSA-2404142;R-HSA-2424254;R-HSA-2395784;R-HSA-2395768;R-HSA-2423785;R-HSA-2404137;R-HSA-2429643
R-HSA-3000178	ECM proteoglycans	5	79	0.0055357	0.687406	0.851808	5	23	0.00169404	9606	Homo sapiens	Lama5;Lama1;Col24a1;Dag1;Fmod		R-HSA-2467716;R-HSA-2396124;R-HSA-2327886;R-HSA-2396395;R-HSA-2466106
R-HSA-2219528	PI3K/AKT Signaling in Cancer	8	124	0.00868895	0.688427	0.851808	3	21	0.00154673	9606	Homo sapiens	Btc;Cd86;Epgn;Cd80;Erbb3;Rac2;Pik3r1;Foxo3		R-HSA-2394007;R-HSA-2399992;R-HSA-2400009
R-HSA-209543	p75NTR recruits signalling complexes	1	16	0.00112115	0.691029	0.851808	9	9	0.000662886	9606	Homo sapiens	Ngfr		R-HSA-193665;R-HSA-193686;R-HSA-193684;R-HSA-193656;R-HSA-193641;R-HSA-193694;R-HSA-209566;R-HSA-193695;R-HSA-193647
R-HSA-4641265	Repression of WNT target genes	1	16	0.00112115	0.691029	0.851808	5	7	0.000515578	9606	Homo sapiens	Tle2		R-HSA-4649028;R-HSA-8944349;R-HSA-4641231;R-HSA-5229348;R-HSA-4641229
R-HSA-9027276	Erythropoietin activates Phosphoinositide-3-kinase (PI3K)	1	16	0.00112115	0.691029	0.851808	4	7	0.000515578	9606	Homo sapiens	Pik3r1		R-HSA-9021627;R-HSA-9027275;R-HSA-9012657;R-HSA-9027280
R-HSA-1358803	Downregulation of ERBB2:ERBB3 signaling	1	16	0.00112115	0.691029	0.851808	4	8	0.000589232	9606	Homo sapiens	Erbb3		R-HSA-1358790;R-HSA-1358801;R-HSA-1358798;R-HSA-1358792
R-HSA-877312	Regulation of IFNG signaling	1	16	0.00112115	0.691029	0.851808	2	4	0.000294616	9606	Homo sapiens	Ifngr1		R-HSA-877308;R-HSA-877269
R-HSA-5687613	Diseases associated with surfactant metabolism	1	16	0.00112115	0.691029	0.851808	2	7	0.000515578	9606	Homo sapiens	Csf2rb		R-HSA-5688884;R-HSA-5688899
R-HSA-418890	Role of second messengers in netrin-1 signaling	1	16	0.00112115	0.691029	0.851808	1	4	0.000294616	9606	Homo sapiens	Trpc1		R-HSA-622390
R-HSA-879415	Advanced glycosylation endproduct receptor signaling	1	16	0.00112115	0.691029	0.851808	1	4	0.000294616	9606	Homo sapiens	Acp1		R-HSA-879377
R-HSA-9617629	Regulation of FOXO transcriptional activity by acetylation	1	16	0.00112115	0.691029	0.851808	2	9	0.000662886	9606	Homo sapiens	Foxo3		R-HSA-9620515;R-HSA-9620532
R-HSA-8984722	Interleukin-35 Signalling	1	16	0.00112115	0.691029	0.851808	5	26	0.001915	9606	Homo sapiens	Il27ra		R-HSA-8984012;R-HSA-8984014;R-HSA-8984001;R-HSA-8984021;R-HSA-8984023
R-HSA-1247673	Erythrocytes take up oxygen and release carbon dioxide	1	16	0.00112115	0.691029	0.851808	1	6	0.000441924	9606	Homo sapiens	Aqp1		R-HSA-1247649
R-HSA-75892	Platelet Adhesion to exposed collagen	1	16	0.00112115	0.691029	0.851808	1	6	0.000441924	9606	Homo sapiens	Itga10		R-HSA-114563
R-HSA-2187338	Visual phototransduction	11	169	0.0118422	0.694542	0.851808	28	92	0.00677617	9606	Homo sapiens	Apc2;Dhrs3;Opn1sw;Pde6g;Rdh11;Rbp1;Cngb1;Ldlr;Lrp8;Camkmt		R-HSA-2466085;R-HSA-975629;R-HSA-2404131;R-HSA-2404140;R-HSA-2404142;R-HSA-74059;R-HSA-3229181;R-HSA-2423785;R-HSA-2404137;R-HSA-74065;R-HSA-2584246;R-HSA-2464822;R-HSA-2404144;R-HSA-2514867;R-HSA-2514865;R-HSA-2465917;R-HSA-2424254;R-HSA-74843;R-HSA-2395768;R-HSA-9656891;R-HSA-2395784;R-HSA-2429643;R-HSA-74031;R-HSA-2855259;R-HSA-2465940;R-HSA-74872;R-HSA-2453855;R-HSA-6786205
R-HSA-397014	Muscle contraction	14	213	0.0149254	0.69579	0.851808	24	42	0.00309347	9606	Homo sapiens	Ccr1;Fxyd3;Atp1b2;Tpm2;Atp2b4;Atp1a3;Scn8a;Mylk;Kcnk2;Kcnj14;Trpc1;Gata4;Itpr3;Sorbs3		R-HSA-390597;R-HSA-445700;R-HSA-390598;R-HSA-418309;R-HSA-445797;R-HSA-390593;R-HSA-445699;R-HSA-390595;R-HSA-2089943;R-HSA-5576895;R-HSA-5617182;R-HSA-5578910;R-HSA-139854;R-HSA-5617179;R-HSA-445704;R-HSA-5617178;R-HSA-936897;R-HSA-445705;R-HSA-169683;R-HSA-445813;R-HSA-5226904;R-HSA-9684068;R-HSA-1296046;R-HSA-2032800
R-HSA-901032	ER Quality Control Compartment (ERQC)	2	33	0.00231238	0.696471	0.851808	1	9	0.000662886	9606	Homo sapiens	Syvn1;Trim13		R-HSA-8867288
R-HSA-445355	Smooth Muscle Contraction	3	49	0.00343354	0.696838	0.851808	6	11	0.000810194	9606	Homo sapiens	Tpm2;Sorbs3;Mylk		R-HSA-445700;R-HSA-445813;R-HSA-445797;R-HSA-445699;R-HSA-445704;R-HSA-445705
R-HSA-9615017	FOXO-mediated transcription of oxidative stress, metabolic and neuronal genes	3	49	0.00343354	0.696838	0.851808	17	34	0.00250424	9606	Homo sapiens	Smad2;44808;Foxo3		R-HSA-9622738;R-HSA-9623280;R-HSA-9624624;R-HSA-9622737;R-HSA-9623281;R-HSA-9623415;R-HSA-9617972;R-HSA-9625749;R-HSA-9623192;R-HSA-9625693;R-HSA-9623427;R-HSA-9625091;R-HSA-9624611;R-HSA-9623072;R-HSA-9623168;R-HSA-9625092;R-HSA-9617833
R-HSA-3214841	PKMTs methylate histone lysines	3	49	0.00343354	0.696838	0.851808	7	22	0.00162039	9606	Homo sapiens	Hist1h4i;Setd1a		R-HSA-5637686;R-HSA-5651654;R-HSA-5159245;R-HSA-5244692;R-HSA-5423038;R-HSA-4827382;R-HSA-5651657
R-HSA-5423646	Aflatoxin activation and detoxification	3	49	0.00343354	0.696838	0.851808	2	18	0.00132577	9606	Homo sapiens	Acy3;Ggt1		R-HSA-5433072;R-HSA-9638046
R-HSA-381119	Unfolded Protein Response (UPR)	10	155	0.0108612	0.699735	0.851808	9	94	0.00692347	9606	Homo sapiens	Fkbp14;Dcstamp;Syvn1;Creb3l2;Pdia5;Dnajb9		R-HSA-1791114;R-HSA-8874198;R-HSA-1791084;R-HSA-8874191;R-HSA-1791122;R-HSA-8874205;R-HSA-8874187;R-HSA-8874200;R-HSA-1791124
R-HSA-9006931	Signaling by Nuclear Receptors	26	387	0.0271179	0.701647	0.851808	41	192	0.0141416	9606	Homo sapiens	Hist1h2ac;Apc2;Dhrs3;Gngt2;Ctsd;Arl4c;Rdh11;Kdm4b;Btc;Cyp26b1;Cpt1a;Epgn;Hist1h4i;Ccdc57;Pdk4;Bcl2;Crabp1;Pkp1;Pik3r1;Foxo3		R-HSA-9011981;R-HSA-9011983;R-HSA-9618394;R-HSA-9618392;R-HSA-5362525;R-HSA-9011975;R-HSA-9632412;R-HSA-5419165;R-HSA-9009371;R-HSA-9021596;R-HSA-200406;R-HSA-9605063;R-HSA-9021660;R-HSA-9625482;R-HSA-9011985;R-HSA-9011984;R-HSA-9624526;R-HSA-9625487;R-HSA-9624527;R-HSA-9009065;R-HSA-5622134;R-HSA-9011949;R-HSA-9011950;R-HSA-9021601;R-HSA-9031521;R-HSA-203946;R-HSA-9021600;R-HSA-9012000;R-HSA-902…
R-HSA-9009391	Extra-nuclear estrogen signaling	7	111	0.00777801	0.704831	0.851808	11	38	0.00279885	9606	Homo sapiens	Btc;Gngt2;Epgn;Bcl2;Pik3r1;Foxo3		R-HSA-9021596;R-HSA-9021660;R-HSA-9625482;R-HSA-9021601;R-HSA-9021600;R-HSA-9625465;R-HSA-9624526;R-HSA-9625487;R-HSA-9624527;R-HSA-9623999;R-HSA-9632412
R-HSA-512988	Interleukin-3, Interleukin-5 and GM-CSF signaling	3	50	0.00350361	0.709662	0.851808	26	38	0.00279885	9606	Homo sapiens	Syk;Csf2rb;Pik3r1		R-HSA-912527;R-HSA-914182;R-HSA-879942;R-HSA-879937;R-HSA-921155;R-HSA-508247;R-HSA-913374;R-HSA-913371;R-HSA-913370;R-HSA-913424;R-HSA-879917;R-HSA-913451;R-HSA-909738;R-HSA-879909;R-HSA-450031;R-HSA-879910;R-HSA-879907;R-HSA-453111;R-HSA-879934;R-HSA-453104;R-HSA-879930;R-HSA-912629;R-HSA-879925;R-HSA-912757;R-HSA-914036;R-HSA-912627
R-HSA-381676	Glucagon-like Peptide-1 (GLP1) regulates insulin secretion	3	50	0.00350361	0.709662	0.851808	5	11	0.000810194	9606	Homo sapiens	Gngt2;Kcnb1;Itpr3		R-HSA-381713;R-HSA-422320;R-HSA-381612;R-HSA-381644;R-HSA-381706
R-HSA-73728	RNA Polymerase I Promoter Opening	2	34	0.00238245	0.711924	0.851808	1	2	0.000147308	9606	Homo sapiens	Hist1h2ac;Hist1h4i		R-HSA-73718
R-HSA-73614	Pyrimidine salvage	2	34	0.00238245	0.711924	0.851808	2	10	0.00073654	9606	Homo sapiens	Tymp;Pnp		R-HSA-74372;R-HSA-112266
R-HSA-5620971	Pyroptosis	2	34	0.00238245	0.711924	0.851808	1	23	0.00169404	9606	Homo sapiens	Chmp4c		R-HSA-9647619
R-HSA-170660	Adenylate cyclase activating pathway	1	17	0.00119123	0.71291	0.851808	4	4	0.000294616	9606	Homo sapiens	Adcy2		R-HSA-170672;R-HSA-170676;R-HSA-170677;R-HSA-170685
R-HSA-8963901	Chylomicron remodeling	1	17	0.00119123	0.71291	0.851808	2	3	0.000220962	9606	Homo sapiens	Apc2		R-HSA-174690;R-HSA-174757
R-HSA-975110	TRAF6 mediated IRF7 activation in TLR7/8 or 9 signaling	1	17	0.00119123	0.71291	0.851808	3	5	0.00036827	9606	Homo sapiens	Tlr7		R-HSA-975118;R-HSA-975188;R-HSA-975106
R-HSA-8853334	Signaling by FGFR3 fusions in cancer	1	17	0.00119123	0.71291	0.851808	3	9	0.000662886	9606	Homo sapiens	Pik3r1		R-HSA-8853316;R-HSA-8853308;R-HSA-8853323
R-HSA-5676594	TNF receptor superfamily (TNFSF) members mediating non-canonical NF-kB pathway	1	17	0.00119123	0.71291	0.851808	3	12	0.000883848	9606	Homo sapiens	Tnfrsf11a		R-HSA-5676595;R-HSA-5676592;R-HSA-5676589
R-HSA-196843	Vitamin B2 (riboflavin) metabolism	1	17	0.00119123	0.71291	0.851808	1	5	0.00036827	9606	Homo sapiens	Acp5		R-HSA-196950
R-HSA-9033807	ABO blood group biosynthesis	1	17	0.00119123	0.71291	0.851808	1	7	0.000515578	9606	Homo sapiens	Fut1		R-HSA-9033949
R-HSA-9029558	NR1H2 & NR1H3 regulate gene expression linked to lipogenesis	1	17	0.00119123	0.71291	0.851808	1	8	0.000589232	9606	Homo sapiens	Ccdc57		R-HSA-9605063
R-HSA-6811555	PI5P Regulates TP53 Acetylation	1	17	0.00119123	0.71291	0.851808	1	8	0.000589232	9606	Homo sapiens	Map2k6		R-HSA-8877691
R-HSA-74752	Signaling by Insulin receptor	6	97	0.006797	0.714809	0.851808	6	34	0.00250424	9606	Homo sapiens	Pde3b;Tcirg1;Atp6v0c;Pik3r1;Atp6v0d2;Atp6v0e2		R-HSA-74737;R-HSA-74723;R-HSA-109699;R-HSA-5252133;R-HSA-162363;R-HSA-162425
R-HSA-73621	Pyrimidine catabolism	3	51	0.00357368	0.722065	0.851808	3	17	0.00125212	9606	Homo sapiens	Tymp;Pnp;Nt5m		R-HSA-112265;R-HSA-74376;R-HSA-109514
R-HSA-1433557	Signaling by SCF-KIT	3	51	0.00357368	0.722065	0.851808	5	39	0.0028725	9606	Homo sapiens	Fer;Cma1;Pik3r1		R-HSA-205328;R-HSA-1562641;R-HSA-1433374;R-HSA-205262;R-HSA-1433514
R-HSA-9674555	Signaling by CSF3 (G-CSF)	2	35	0.00245253	0.726713	0.851808	15	21	0.00154673	9606	Homo sapiens	Syk;Csf3		R-HSA-9674546;R-HSA-9677585;R-HSA-9705726;R-HSA-9674808;R-HSA-9674558;R-HSA-9705467;R-HSA-9674563;R-HSA-9674562;R-HSA-9674816;R-HSA-9676071;R-HSA-9674567;R-HSA-9705729;R-HSA-9677579;R-HSA-9707977;R-HSA-9705738
R-HSA-917729	Endosomal Sorting Complex Required For Transport (ESCRT)	2	35	0.00245253	0.726713	0.851808	2	4	0.000294616	9606	Homo sapiens	Chmp4c		R-HSA-917693;R-HSA-917700
R-HSA-418990	Adherens junctions interactions	2	35	0.00245253	0.726713	0.851808	6	16	0.00117846	9606	Homo sapiens	Cadm3;Cdh15		R-HSA-420582;R-HSA-420592;R-HSA-419002;R-HSA-420586;R-HSA-420584;R-HSA-419001
R-HSA-392154	Nitric oxide stimulates guanylate cyclase	2	35	0.00245253	0.726713	0.851808	2	7	0.000515578	9606	Homo sapiens	Ccr1;Pde1a		R-HSA-418436;R-HSA-418456
R-HSA-418360	Platelet calcium homeostasis	2	35	0.00245253	0.726713	0.851808	2	8	0.000589232	9606	Homo sapiens	Atp2b4;Itpr3		R-HSA-418309;R-HSA-139854
R-HSA-1592389	Activation of Matrix Metalloproteinases	2	35	0.00245253	0.726713	0.851808	1	27	0.00198866	9606	Homo sapiens	Tpsb2;Cma1;Tpsab1		R-HSA-1592316
R-HSA-399956	CRMPs in Sema3A signaling	1	18	0.0012613	0.733242	0.851808	5	5	0.00036827	9606	Homo sapiens	Plxna1		R-HSA-399951;R-HSA-399946;R-HSA-399947;R-HSA-399931;R-HSA-399944
R-HSA-205043	NRIF signals cell death from the nucleus	1	18	0.0012613	0.733242	0.851808	4	7	0.000515578	9606	Homo sapiens	Ngfr		R-HSA-204949;R-HSA-193669;R-HSA-205112;R-HSA-193677
R-HSA-5607763	CLEC7A (Dectin-1) induces NFAT activation	1	18	0.0012613	0.733242	0.851808	2	6	0.000441924	9606	Homo sapiens	Itpr3		R-HSA-169683;R-HSA-169680
R-HSA-418457	cGMP effects	1	18	0.0012613	0.733242	0.851808	1	4	0.000294616	9606	Homo sapiens	Pde1a		R-HSA-418456
R-HSA-5655291	Signaling by FGFR4 in disease	1	18	0.0012613	0.733242	0.851808	3	15	0.00110481	9606	Homo sapiens	Pik3r1		R-HSA-5655252;R-HSA-5655235;R-HSA-5655248
R-HSA-6814848	Glycerophospholipid catabolism	1	18	0.0012613	0.733242	0.851808	1	7	0.000515578	9606	Homo sapiens	Gdpd3		R-HSA-6814778
R-HSA-2160916	Hyaluronan uptake and degradation	1	18	0.0012613	0.733242	0.851808	1	10	0.00073654	9606	Homo sapiens	Hexa		R-HSA-2162225
R-HSA-417957	P2Y receptors	1	18	0.0012613	0.733242	0.851808	1	13	0.000957502	9606	Homo sapiens	P2ry2		R-HSA-417927
R-HSA-1638074	Keratan sulfate/keratin metabolism	3	52	0.00364375	0.73405	0.851808	11	16	0.00117846	9606	Homo sapiens	Hexa;B3gnt2;Fmod		R-HSA-2046239;R-HSA-2046175;R-HSA-2046222;R-HSA-2025724;R-HSA-2046285;R-HSA-2046298;R-HSA-2025723;R-HSA-2046265;R-HSA-1793217;R-HSA-2046180;R-HSA-1638053
R-HSA-156590	Glutathione conjugation	4	68	0.00476491	0.734076	0.851808	3	14	0.00103116	9606	Homo sapiens	Chac1;Ggt1;Oplah		R-HSA-8943279;R-HSA-1247935;R-HSA-6785928
R-HSA-8856825	Cargo recognition for clathrin-mediated endocytosis	7	115	0.0080583	0.73812	0.851808	4	15	0.00110481	9606	Homo sapiens	Btc;Scarb2;Epgn;Tfrc;Sh3gl3;Ldlr;Dab2		R-HSA-8866279;R-HSA-8866277;R-HSA-8863472;R-HSA-8863471
R-HSA-5334118	DNA methylation	2	36	0.0025226	0.740854	0.851808	7	7	0.000515578	9606	Homo sapiens	Hist1h2ac;Hist1h4i		R-HSA-5334097;R-HSA-5334160;R-HSA-5334099;R-HSA-5334179;R-HSA-5334164;R-HSA-5334151;R-HSA-5334152
R-HSA-1250196	SHC1 events in ERBB2 signaling	2	36	0.0025226	0.740854	0.851808	4	6	0.000441924	9606	Homo sapiens	Btc;Erbb3		R-HSA-1250195;R-HSA-1250486;R-HSA-1963578;R-HSA-1250463
R-HSA-8863795	Downregulation of ERBB2 signaling	2	36	0.0025226	0.740854	0.851808	6	14	0.00103116	9606	Homo sapiens	Btc;Erbb3		R-HSA-1358790;R-HSA-1358801;R-HSA-1963563;R-HSA-1358798;R-HSA-8863804;R-HSA-1358792
R-HSA-2173789	TGF-beta receptor signaling activates SMADs	2	36	0.0025226	0.740854	0.851808	12	39	0.0028725	9606	Homo sapiens	Smad2;Bambi		R-HSA-170850;R-HSA-170835;R-HSA-173542;R-HSA-2176452;R-HSA-170868;R-HSA-2187401;R-HSA-173483;R-HSA-2187355;R-HSA-2187405;R-HSA-2176445;R-HSA-170847;R-HSA-2187358
R-HSA-5686938	Regulation of TLR by endogenous ligand	2	36	0.0025226	0.740854	0.851808	2	12	0.000883848	9606	Homo sapiens	Lbp;S100a9		R-HSA-5432849;R-HSA-8869683
R-HSA-114452	Activation of BH3-only proteins	2	36	0.0025226	0.740854	0.851808	3	19	0.00139943	9606	Homo sapiens	Bcl2;Bmf		R-HSA-139908;R-HSA-139909;R-HSA-139897
R-HSA-9008059	Interleukin-37 signaling	2	36	0.0025226	0.740854	0.851808	1	14	0.00103116	9606	Homo sapiens	Ptpn13		R-HSA-9008894
R-HSA-1442490	Collagen degradation	4	69	0.00483498	0.744284	0.851808	7	34	0.00250424	9606	Homo sapiens	Ctsd;Col23a1;Col24a1;Col8a2		R-HSA-2471621;R-HSA-2482180;R-HSA-1454757;R-HSA-2172405;R-HSA-2537499;R-HSA-1564169;R-HSA-1564184
R-HSA-3299685	Detoxification of Reactive Oxygen Species	4	69	0.00483498	0.744284	0.851808	3	34	0.00250424	9606	Homo sapiens	Ncf1;Ncf4;Gsr		R-HSA-71682;R-HSA-3323079;R-HSA-1222376
R-HSA-1489509	DAG and IP3 signaling	3	53	0.00371383	0.745624	0.851808	5	28	0.00206231	9606	Homo sapiens	Pde1a;Adcy2;Itpr3		R-HSA-169683;R-HSA-111955;R-HSA-169680;R-HSA-111956;R-HSA-111930
R-HSA-170670	Adenylate cyclase inhibitory pathway	1	19	0.00133137	0.752136	0.851808	5	5	0.00036827	9606	Homo sapiens	Adcy2		R-HSA-170674;R-HSA-170666;R-HSA-392206;R-HSA-170686;R-HSA-170671
R-HSA-8964315	G beta:gamma signalling through BTK	1	19	0.00133137	0.752136	0.851808	3	3	0.000220962	9606	Homo sapiens	Gngt2		R-HSA-8964317;R-HSA-8964271;R-HSA-8964241
R-HSA-193639	p75NTR signals via NF-kB	1	19	0.00133137	0.752136	0.851808	11	13	0.000957502	9606	Homo sapiens	Ngfr		R-HSA-193665;R-HSA-193686;R-HSA-193703;R-HSA-193684;R-HSA-193656;R-HSA-193641;R-HSA-193705;R-HSA-193694;R-HSA-209566;R-HSA-193695;R-HSA-193647
R-HSA-9673770	Signaling by PDGFRA extracellular domain mutants	1	19	0.00133137	0.752136	0.851808	2	7	0.000515578	9606	Homo sapiens	Pik3r1		R-HSA-9672162;R-HSA-9672178
R-HSA-9673767	Signaling by PDGFRA transmembrane, juxtamembrane and kinase domain mutants	1	19	0.00133137	0.752136	0.851808	2	7	0.000515578	9606	Homo sapiens	Pik3r1		R-HSA-9672177;R-HSA-9672172
R-HSA-8875360	InlB-mediated entry of Listeria monocytogenes into host cell	1	19	0.00133137	0.752136	0.851808	2	8	0.000589232	9606	Homo sapiens	Sh3gl3		R-HSA-8876262;R-HSA-8876255
R-HSA-111447	Activation of BAD and translocation to mitochondria	1	19	0.00133137	0.752136	0.851808	1	5	0.00036827	9606	Homo sapiens	Bcl2		R-HSA-139897
R-HSA-3270619	IRF3-mediated induction of type I IFN	1	19	0.00133137	0.752136	0.851808	1	5	0.00036827	9606	Homo sapiens	Dtx4		R-HSA-2396007
R-HSA-73942	DNA Damage Reversal	1	19	0.00133137	0.752136	0.851808	2	16	0.00117846	9606	Homo sapiens	Mgmt		R-HSA-73892;R-HSA-5657651
R-HSA-196780	Biotin transport and metabolism	1	19	0.00133137	0.752136	0.851808	1	13	0.000957502	9606	Homo sapiens	Slc5a6		R-HSA-199219
R-HSA-2022854	Keratan sulfate biosynthesis	2	37	0.00259267	0.754363	0.851808	8	9	0.000662886	9606	Homo sapiens	B3gnt2;Fmod		R-HSA-2046175;R-HSA-2046222;R-HSA-2025724;R-HSA-2046285;R-HSA-2046298;R-HSA-2025723;R-HSA-2046265;R-HSA-2046180
R-HSA-162588	Budding and maturation of HIV virion	2	37	0.00259267	0.754363	0.851808	2	4	0.000294616	9606	Homo sapiens	Chmp4c		R-HSA-3159232;R-HSA-3159227
R-HSA-2514859	Inactivation, recovery and regulation of the phototransduction cascade	3	54	0.0037839	0.756792	0.851808	4	19	0.00139943	9606	Homo sapiens	Pde6g;Cngb1;Camkmt		R-HSA-2584246;R-HSA-6786205;R-HSA-3229181;R-HSA-74031
R-HSA-418346	Platelet homeostasis	7	118	0.00826852	0.761305	0.851808	11	30	0.00220962	9606	Homo sapiens	Ccr1;Ptgir;Gngt2;Atp2b4;Pde1a;Lrp8;Itpr3		R-HSA-392852;R-HSA-418436;R-HSA-392870;R-HSA-391942;R-HSA-418309;R-HSA-432129;R-HSA-8948034;R-HSA-139854;R-HSA-418456;R-HSA-392874;R-HSA-432121
R-HSA-2132295	MHC class II antigen presentation	9	149	0.0104408	0.763264	0.851808	10	26	0.001915	9606	Homo sapiens	Ap1m2;Ctsc;Klc3;Ctsd;Ap1s2;Acp1;Sec24d		R-HSA-2213248;R-HSA-2130641;R-HSA-2130706;R-HSA-8951498;R-HSA-2213236;R-HSA-2130504;R-HSA-2213243;R-HSA-2130731;R-HSA-2130619;R-HSA-2130349
R-HSA-5579029	Metabolic disorders of biological oxidation enzymes	5	87	0.00609628	0.763778	0.851808	6	38	0.00279885	9606	Homo sapiens	Cyp26b1;Tbxas1;Fdxr;Ggt1;Oplah		R-HSA-9035966;R-HSA-5580269;R-HSA-5602063;R-HSA-5602984;R-HSA-5603208;R-HSA-5603275
R-HSA-168643	Nucleotide-binding domain, leucine rich repeat containing receptor (NLR) signaling pathways	4	71	0.00497512	0.763799	0.851808	9	46	0.00338808	9606	Homo sapiens	Pycard;Bcl2;Mefv;Map2k6		R-HSA-727819;R-HSA-844620;R-HSA-844618;R-HSA-844612;R-HSA-879221;R-HSA-1247960;R-HSA-877361;R-HSA-879201;R-HSA-844610
R-HSA-9616222	Transcriptional regulation of granulopoiesis	4	71	0.00497512	0.763799	0.851808	3	27	0.00198866	9606	Homo sapiens	Hist1h2ac;Cklf;Hist1h4i		R-HSA-8865505;R-HSA-9634442;R-HSA-9622363
R-HSA-2129379	Molecules associated with elastic fibres	2	38	0.00266274	0.767261	0.851808	4	10	0.00073654	9606	Homo sapiens	Eln;Bmp7		R-HSA-2161282;R-HSA-2328048;R-HSA-1592387;R-HSA-2396399
R-HSA-9013407	RHOH GTPase cycle	2	38	0.00266274	0.767261	0.851808	1	3	0.000220962	9606	Homo sapiens	Tfrc;Pak4		R-HSA-9018758
R-HSA-111465	Apoptotic cleavage of cellular proteins	2	38	0.00266274	0.767261	0.851808	2	38	0.00279885	9606	Homo sapiens	Dsp;Pkp1		R-HSA-201636;R-HSA-201595
R-HSA-8955332	Carboxyterminal post-translational modifications of tubulin	3	55	0.00385397	0.767561	0.851808	3	6	0.000441924	9606	Homo sapiens	Ttll7;Ttll10;Ttll1		R-HSA-8955869;R-HSA-8865774;R-HSA-8867370
R-HSA-2672351	Stimuli-sensing channels	7	119	0.00833859	0.768694	0.851808	5	28	0.00206231	9606	Homo sapiens	Clcn6;Ttyh1;Trpc1;Trpv3;Trpv2;Ano6		R-HSA-2744349;R-HSA-3295579;R-HSA-2744242;R-HSA-2684901;R-HSA-2730692
R-HSA-388844	Receptor-type tyrosine-protein phosphatases	1	20	0.00140144	0.769693	0.851808	2	6	0.000441924	9606	Homo sapiens	Ptprf		R-HSA-6798258;R-HSA-388824
R-HSA-8849471	PTK6 Regulates RHO GTPases, RAS GTPase and MAP kinases	1	20	0.00140144	0.769693	0.851808	2	13	0.000957502	9606	Homo sapiens	Elmo1		R-HSA-8848611;R-HSA-8848618
R-HSA-3232118	SUMOylation of transcription factors	1	20	0.00140144	0.769693	0.851808	1	11	0.000810194	9606	Homo sapiens	Mitf		R-HSA-3232162
R-HSA-211976	Endogenous sterols	4	72	0.0050452	0.773112	0.851808	6	18	0.00132577	9606	Homo sapiens	Ptgis;44808;Ahrr;Fdxr		R-HSA-193845;R-HSA-211951;R-HSA-193997;R-HSA-193101;R-HSA-192157;R-HSA-193709
R-HSA-5668541	TNFR2 non-canonical NF-kB pathway	6	104	0.00728751	0.773483	0.851808	12	43	0.00316712	9606	Homo sapiens	Tnfsf4;Tnfrsf11b;Tnfrsf11a;Tnfrsf25;Eda2r;Tnfrsf13b;Tnfrsf19		R-HSA-5668534;R-HSA-5668454;R-HSA-5693012;R-HSA-5669013;R-HSA-5676595;R-HSA-5676592;R-HSA-5668481;R-HSA-5668414;R-HSA-5676607;R-HSA-5676589;R-HSA-5692315;R-HSA-5669035
R-HSA-8963899	Plasma lipoprotein remodeling	3	56	0.00392404	0.777938	0.851808	8	31	0.00228327	9606	Homo sapiens	Apc2;Lipc		R-HSA-174690;R-HSA-174757;R-HSA-6784622;R-HSA-6785181;R-HSA-6785213;R-HSA-266303;R-HSA-5694109;R-HSA-6785178
R-HSA-9031628	NGF-stimulated transcription	3	56	0.00392404	0.777938	0.851808	3	37	0.0027252	9606	Homo sapiens	Sh3gl3;Id4		R-HSA-9612534;R-HSA-9613476;R-HSA-9619838
R-HSA-9668328	Sealing of the nuclear envelope (NE) by ESCRT-III	2	39	0.00273281	0.779565	0.851808	6	7	0.000515578	9606	Homo sapiens	Chmp4c		R-HSA-9668419;R-HSA-9668389;R-HSA-9668405;R-HSA-9668395;R-HSA-9668415;R-HSA-9668398
R-HSA-397795	G-protein beta:gamma signalling	2	39	0.00273281	0.779565	0.851808	12	15	0.00110481	9606	Homo sapiens	Gngt2;Pik3r6		R-HSA-392295;R-HSA-8964634;R-HSA-8964604;R-HSA-8964605;R-HSA-8964317;R-HSA-8964271;R-HSA-398193;R-HSA-392300;R-HSA-8964241;R-HSA-8964614;R-HSA-398040;R-HSA-8964599
R-HSA-9013424	RHOV GTPase cycle	2	39	0.00273281	0.779565	0.851808	1	2	0.000147308	9606	Homo sapiens	Pik3r1;Pak4		R-HSA-9018794
R-HSA-9037629	Lewis blood group biosynthesis	2	39	0.00273281	0.779565	0.851808	2	13	0.000957502	9606	Homo sapiens	Fut7;B3galt2		R-HSA-9605682;R-HSA-9603989
R-HSA-9619665	EGR2 and SOX10-mediated initiation of Schwann cell myelination	2	39	0.00273281	0.779565	0.851808	3	26	0.001915	9606	Homo sapiens	Adgrv1;Dag1		R-HSA-9619666;R-HSA-9619668;R-HSA-9614778
R-HSA-1855204	Synthesis of IP3 and IP4 in the cytosol	2	39	0.00273281	0.779565	0.851808	1	12	0.000883848	9606	Homo sapiens	Itpkc		R-HSA-1855153
R-HSA-6806667	Metabolism of fat-soluble vitamins	5	89	0.00623642	0.780487	0.851808	12	34	0.00250424	9606	Homo sapiens	Apc2;Rdh11;Rbp1;Ldlr;Lrp8		R-HSA-2855259;R-HSA-975629;R-HSA-2404144;R-HSA-2404131;R-HSA-2404140;R-HSA-2404142;R-HSA-2424254;R-HSA-2395784;R-HSA-2395768;R-HSA-2423785;R-HSA-2404137;R-HSA-2429643
R-HSA-1912408	Pre-NOTCH Transcription and Translation	5	89	0.00623642	0.780487	0.851808	9	28	0.00206231	9606	Homo sapiens	Hist1h2ac;Hist1h4i;Notch3		R-HSA-9604834;R-HSA-1912415;R-HSA-9017835;R-HSA-1912366;R-HSA-1912409;R-HSA-1912362;R-HSA-9604831;R-HSA-9021364;R-HSA-9604829
R-HSA-2892247	POU5F1 (OCT4), SOX2, NANOG activate genes related to proliferation	1	21	0.00147152	0.786007	0.851808	16	16	0.00117846	9606	Homo sapiens	Pou5f1		R-HSA-2972975;R-HSA-480515;R-HSA-452515;R-HSA-452750;R-HSA-2972964;R-HSA-2972967;R-HSA-2972960;R-HSA-2972962;R-HSA-480470;R-HSA-2972956;R-HSA-452338;R-HSA-452958;R-HSA-480509;R-HSA-452701;R-HSA-2972978;R-HSA-6800120
R-HSA-1250347	SHC1 events in ERBB4 signaling	1	21	0.00147152	0.786007	0.851808	4	4	0.000294616	9606	Homo sapiens	Btc		R-HSA-1250357;R-HSA-1250383;R-HSA-1250380;R-HSA-1250348
R-HSA-8964616	G beta:gamma signalling through CDC42	1	21	0.00147152	0.786007	0.851808	5	6	0.000441924	9606	Homo sapiens	Gngt2		R-HSA-8964634;R-HSA-8964604;R-HSA-8964605;R-HSA-8964614;R-HSA-8964599
R-HSA-1963640	GRB2 events in ERBB2 signaling	1	21	0.00147152	0.786007	0.851808	2	4	0.000294616	9606	Homo sapiens	Btc		R-HSA-1306969;R-HSA-1306972
R-HSA-3134975	Regulation of innate immune responses to cytosolic DNA	1	21	0.00147152	0.786007	0.851808	4	9	0.000662886	9606	Homo sapiens	Dtx4		R-HSA-3249392;R-HSA-8948703;R-HSA-3249386;R-HSA-8948709
R-HSA-9671793	Diseases of hemostasis	1	21	0.00147152	0.786007	0.851808	6	18	0.00132577	9606	Homo sapiens	F9		R-HSA-9673223;R-HSA-9670874;R-HSA-9670888;R-HSA-9673231;R-HSA-9668253;R-HSA-9668365
R-HSA-9651496	Defects of contact activation system (CAS) and kallikrein/kinin system (KKS)	1	21	0.00147152	0.786007	0.851808	6	18	0.00132577	9606	Homo sapiens	F9		R-HSA-9673223;R-HSA-9670874;R-HSA-9670888;R-HSA-9673231;R-HSA-9668253;R-HSA-9668365
R-HSA-964975	Vitamins B6 activation to pyridoxal phosphate	1	21	0.00147152	0.786007	0.851808	2	6	0.000441924	9606	Homo sapiens	Pnpo		R-HSA-965019;R-HSA-965079
R-HSA-3000471	Scavenging by Class B Receptors	1	21	0.00147152	0.786007	0.851808	1	5	0.00036827	9606	Homo sapiens	Ssc5d		R-HSA-8878603
R-HSA-5661270	Formation of xylulose-5-phosphate	1	21	0.00147152	0.786007	0.851808	1	6	0.000441924	9606	Homo sapiens	Cryl1		R-HSA-5661290
R-HSA-196783	Coenzyme A biosynthesis	1	21	0.00147152	0.786007	0.851808	1	7	0.000515578	9606	Homo sapiens	Gda		R-HSA-199216
R-HSA-6798163	Choline catabolism	1	21	0.00147152	0.786007	0.851808	1	8	0.000589232	9606	Homo sapiens	Chdh		R-HSA-6797961
R-HSA-5620920	Cargo trafficking to the periciliary membrane	3	57	0.00399411	0.787931	0.851808	14	27	0.00198866	9606	Homo sapiens	Arl6;Cngb1;Bbs9		R-HSA-5617815;R-HSA-5620918;R-HSA-5620914;R-HSA-5624125;R-HSA-5623519;R-HSA-5624127;R-HSA-5624126;R-HSA-5623513;R-HSA-5620921;R-HSA-5623525;R-HSA-5623524;R-HSA-5623527;R-HSA-5623521;R-HSA-5624129
R-HSA-70268	Pyruvate metabolism	3	57	0.00399411	0.787931	0.851808	4	15	0.00110481	9606	Homo sapiens	Ldha;Pdk4;Pkp1		R-HSA-71849;R-HSA-203946;R-HSA-9011543;R-HSA-70510
R-HSA-2453902	The canonical retinoid cycle in rods (twilight vision)	3	57	0.00399411	0.787931	0.851808	4	25	0.00184135	9606	Homo sapiens	Rdh11;Rbp1		R-HSA-2464822;R-HSA-74872;R-HSA-2453855;R-HSA-74843
R-HSA-191273	Cholesterol biosynthesis	4	74	0.00518534	0.790869	0.851808	7	34	0.00250424	9606	Homo sapiens	Fdps;Hsd17b7;Dhcr7;Lss		R-HSA-196402;R-HSA-194689;R-HSA-191366;R-HSA-191303;R-HSA-6807055;R-HSA-191322;R-HSA-194632
R-HSA-114508	Effects of PIP2 hydrolysis	2	40	0.00280289	0.791295	0.851808	3	9	0.000662886	9606	Homo sapiens	Dgke;Itpr3		R-HSA-426240;R-HSA-139941;R-HSA-139854
R-HSA-68616	Assembly of the ORC complex at the origin of replication	2	40	0.00280289	0.791295	0.851808	2	11	0.000810194	9606	Homo sapiens	Hist1h2ac;Hist1h4i		R-HSA-9749197;R-HSA-9749098
R-HSA-9013026	RHOB GTPase cycle	4	75	0.00525541	0.79932	0.851808	2	6	0.000441924	9606	Homo sapiens	Rtkn;Tfrc;Ophn1;Pik3r1		R-HSA-9013022;R-HSA-9013024
R-HSA-174437	Removal of the Flap Intermediate from the C-strand	1	22	0.00154159	0.801167	0.851808	4	4	0.000294616	9606	Homo sapiens	Trf		R-HSA-174451;R-HSA-174441;R-HSA-174446;R-HSA-174445
R-HSA-174430	Telomere C-strand synthesis initiation	1	22	0.00154159	0.801167	0.851808	3	4	0.000294616	9606	Homo sapiens	Trf		R-HSA-9668597;R-HSA-174427;R-HSA-174425
R-HSA-211916	Vitamins	1	22	0.00154159	0.801167	0.851808	1	5	0.00036827	9606	Homo sapiens	Cyp26b1		R-HSA-212007
R-HSA-139853	Elevation of cytosolic Ca2+ levels	1	22	0.00154159	0.801167	0.851808	1	5	0.00036827	9606	Homo sapiens	Itpr3		R-HSA-139854
R-HSA-400511	Synthesis, secretion, and inactivation of Glucose-dependent Insulinotropic Polypeptide (GIP)	1	22	0.00154159	0.801167	0.851808	1	7	0.000515578	9606	Homo sapiens	Gata4		R-HSA-400500
R-HSA-2408550	Metabolism of ingested H2SeO4 and H2SeO3 into H2Se	1	22	0.00154159	0.801167	0.851808	1	7	0.000515578	9606	Homo sapiens	Gsr		R-HSA-2408542
R-HSA-5637812	Signaling by EGFRvIII in Cancer	1	22	0.00154159	0.801167	0.851808	2	18	0.00132577	9606	Homo sapiens	Pik3r1		R-HSA-5637765;R-HSA-5637801
R-HSA-5637810	Constitutive Signaling by EGFRvIII	1	22	0.00154159	0.801167	0.851808	2	18	0.00132577	9606	Homo sapiens	Pik3r1		R-HSA-5637765;R-HSA-5637801
R-HSA-5210891	Uptake and function of anthrax toxins	1	22	0.00154159	0.801167	0.851808	1	20	0.00147308	9606	Homo sapiens	Map2k6		R-HSA-5211405
R-HSA-2028269	Signaling by Hippo	1	22	0.00154159	0.801167	0.851808	1	30	0.00220962	9606	Homo sapiens	Nphp4		R-HSA-2059926
R-HSA-901042	Calnexin/calreticulin cycle	2	41	0.00287296	0.802471	0.851808	1	13	0.000957502	9606	Homo sapiens	Syvn1;Trim13		R-HSA-8867288
R-HSA-2514856	The phototransduction cascade	3	59	0.00413426	0.806797	0.851808	8	27	0.00198866	9606	Homo sapiens	Pde6g;Cngb1;Camkmt		R-HSA-74065;R-HSA-2584246;R-HSA-2514867;R-HSA-2514865;R-HSA-6786205;R-HSA-74059;R-HSA-3229181;R-HSA-74031
R-HSA-373752	Netrin-1 signaling	3	59	0.00413426	0.806797	0.851808	2	37	0.0027252	9606	Homo sapiens	Ablim2;Trpc1;Ablim3		R-HSA-418865;R-HSA-622390
R-HSA-1650814	Collagen biosynthesis and modifying enzymes	4	76	0.00532549	0.807494	0.851808	26	51	0.00375635	9606	Homo sapiens	Col23a1;Col24a1;Col8a2		R-HSA-8948232;R-HSA-2002460;R-HSA-8948234;R-HSA-8948224;R-HSA-8944257;R-HSA-8948226;R-HSA-8948228;R-HSA-8948230;R-HSA-8948231;R-HSA-8944218;R-HSA-8944220;R-HSA-2002440;R-HSA-1981128;R-HSA-1980233;R-HSA-1981120;R-HSA-1650808;R-HSA-2002428;R-HSA-2022073;R-HSA-2089971;R-HSA-8944229;R-HSA-1981104;R-HSA-8944230;R-HSA-8948219;R-HSA-2152276;R-HSA-8948222;R-HSA-1981157
R-HSA-1482839	Acyl chain remodelling of PE	2	42	0.00294303	0.813111	0.851808	2	9	0.000662886	9606	Homo sapiens	Mboat1;Mboat2		R-HSA-1482646;R-HSA-1482667
R-HSA-3296482	Defects in vitamin and cofactor metabolism	2	42	0.00294303	0.813111	0.851808	3	21	0.00154673	9606	Homo sapiens	Tcn2;Mmab		R-HSA-3325546;R-HSA-3299657;R-HSA-3322125
R-HSA-1912420	Pre-NOTCH Processing in Golgi	1	23	0.00161166	0.815253	0.851808	8	8	0.000589232	9606	Homo sapiens	Notch3		R-HSA-1912382;R-HSA-1912379;R-HSA-1912378;R-HSA-1912372;R-HSA-1912374;R-HSA-1912369;R-HSA-1912352;R-HSA-1912355
R-HSA-418217	G beta:gamma signalling through PLC beta	1	23	0.00161166	0.815253	0.851808	2	2	0.000147308	9606	Homo sapiens	Gngt2		R-HSA-398193;R-HSA-398040
R-HSA-9614657	FOXO-mediated transcription of cell death genes	1	23	0.00161166	0.815253	0.851808	14	15	0.00110481	9606	Homo sapiens	Foxo3		R-HSA-9622579;R-HSA-9621270;R-HSA-9621242;R-HSA-9625375;R-HSA-9621116;R-HSA-9625378;R-HSA-9622627;R-HSA-9622630;R-HSA-9614662;R-HSA-9622667;R-HSA-9621289;R-HSA-9622668;R-HSA-9622604;R-HSA-9614669
R-HSA-181429	Serotonin Neurotransmitter Release Cycle	1	23	0.00161166	0.815253	0.851808	2	4	0.000294616	9606	Homo sapiens	Rbp1		R-HSA-380901;R-HSA-380905
R-HSA-500657	Presynaptic function of Kainate receptors	1	23	0.00161166	0.815253	0.851808	1	2	0.000147308	9606	Homo sapiens	Gngt2		R-HSA-500717
R-HSA-164378	PKA activation in glucagon signalling	1	23	0.00161166	0.815253	0.851808	1	2	0.000147308	9606	Homo sapiens	Adcy2		R-HSA-164377
R-HSA-1839117	Signaling by cytosolic FGFR1 fusion mutants	1	23	0.00161166	0.815253	0.851808	6	14	0.00103116	9606	Homo sapiens	Pik3r1		R-HSA-1839102;R-HSA-1839080;R-HSA-1839114;R-HSA-1839078;R-HSA-1839107;R-HSA-1839091
R-HSA-432142	Platelet sensitization by LDL	1	23	0.00161166	0.815253	0.851808	3	9	0.000662886	9606	Homo sapiens	Lrp8		R-HSA-432129;R-HSA-8948034;R-HSA-432121
R-HSA-3928664	Ephrin signaling	1	23	0.00161166	0.815253	0.851808	3	11	0.000810194	9606	Homo sapiens	Pak3		R-HSA-3928625;R-HSA-3928641;R-HSA-3928640
R-HSA-163615	PKA activation	1	23	0.00161166	0.815253	0.851808	1	4	0.000294616	9606	Homo sapiens	Adcy2		R-HSA-111930
R-HSA-1480926	O2/CO2 exchange in erythrocytes	1	23	0.00161166	0.815253	0.851808	2	13	0.000957502	9606	Homo sapiens	Aqp1		R-HSA-1237042;R-HSA-1247649
R-HSA-1237044	Erythrocytes take up carbon dioxide and release oxygen	1	23	0.00161166	0.815253	0.851808	1	7	0.000515578	9606	Homo sapiens	Aqp1		R-HSA-1237042
R-HSA-9665348	Signaling by ERBB2 ECD mutants	1	23	0.00161166	0.815253	0.851808	2	15	0.00110481	9606	Homo sapiens	Pik3r1		R-HSA-9665415;R-HSA-9665407
R-HSA-1606322	ZBP1(DAI) mediated induction of type I IFNs	1	23	0.00161166	0.815253	0.851808	1	11	0.000810194	9606	Homo sapiens	Dtx4		R-HSA-1606327
R-HSA-2142845	Hyaluronan metabolism	1	23	0.00161166	0.815253	0.851808	1	13	0.000957502	9606	Homo sapiens	Hexa		R-HSA-2162225
R-HSA-204005	COPII-mediated vesicle transport	4	77	0.00539556	0.815394	0.851808	13	16	0.00117846	9606	Homo sapiens	Ctsc;Sec22c;Sec24d;F5		R-HSA-5694423;R-HSA-5694421;R-HSA-5694418;R-HSA-203973;R-HSA-5694417;R-HSA-5694527;R-HSA-204008;R-HSA-5694522;R-HSA-5694425;R-HSA-5694439;R-HSA-5694446;R-HSA-5694441;R-HSA-5694409
R-HSA-5339562	Uptake and actions of bacterial toxins	3	60	0.00420433	0.815688	0.851808	11	66	0.00486116	9606	Homo sapiens	Sv2c;Star;Map2k6		R-HSA-5250880;R-HSA-5211405;R-HSA-5250884;R-HSA-5244424;R-HSA-5250600;R-HSA-5250616;R-HSA-5250875;R-HSA-8936356;R-HSA-5244428;R-HSA-5244415;R-HSA-5250607
R-HSA-500792	GPCR ligand binding	39	606	0.0424637	0.818592	0.851808	30	187	0.0137733	9606	Homo sapiens	Adora2a;Adgre5;Opn1sw;Cxcr1;C5ar2;Cxcr2;C5ar1;Aplnr;Fpr2;Ccl17;Ccr10;Vipr2;Vipr1;Pnp;Ptger2;P2ry2;Wnt7a;Cxcl1;Ccr5;Wnt2;Pthlh;Wnt4;Cxcl5;Wnt10b;Ccr1;Gngt2;Pmch;Ackr4;Cort;Wnt2b;Ptgir;44808;Gpr35;F2rl1		R-HSA-373061;R-HSA-417927;R-HSA-391940;R-HSA-391942;R-HSA-374337;R-HSA-964811;R-HSA-419841;R-HSA-443978;R-HSA-420233;R-HSA-420489;R-HSA-389463;R-HSA-373073;R-HSA-443986;R-HSA-947673;R-HSA-373791;R-HSA-373086;R-HSA-374298;R-HSA-374758;R-HSA-444773;R-HSA-375395;R-HSA-381612;R-HSA-418925;R-HSA-391913;R-HSA-201708;R-HSA-373813;R-HSA-388596;R-HSA-6805205;R-HSA-879674;R-HSA-388605;R-HSA-388863
R-HSA-381426	Regulation of Insulin-like Growth Factor (IGF) transport and uptake by Insulin-like Growth Factor Binding Proteins (IGFBPs)	7	127	0.00889917	0.821833	0.851808	3	14	0.00103116	9606	Homo sapiens	Igfbp4;Notum;Pcsk9;Sparcl1;Igfbp7;Fam20c;F5		R-HSA-381543;R-HSA-8952289;R-HSA-381518
R-HSA-111933	Calmodulin induced events	2	43	0.0030131	0.823237	0.851808	3	23	0.00169404	9606	Homo sapiens	Pde1a;Adcy2		R-HSA-111955;R-HSA-111956;R-HSA-111930
R-HSA-111997	CaM pathway	2	43	0.0030131	0.823237	0.851808	3	24	0.0017677	9606	Homo sapiens	Pde1a;Adcy2		R-HSA-111955;R-HSA-111956;R-HSA-111930
R-HSA-1989781	PPARA activates gene expression	10	175	0.0122626	0.824927	0.851808	6	41	0.00301981	9606	Homo sapiens	Glipr1;Cpt1a;Slc27a1;Ahrr;Plin2;Ubxn6		R-HSA-1989772;R-HSA-1989770;R-HSA-1368065;R-HSA-1801587;R-HSA-1989750;R-HSA-1989764
R-HSA-5654710	PI-3K cascade:FGFR3	1	24	0.00168173	0.828343	0.851808	7	7	0.000515578	9606	Homo sapiens	Pik3r1		R-HSA-5654709;R-HSA-5654643;R-HSA-5654640;R-HSA-5654641;R-HSA-5654705;R-HSA-177931;R-HSA-5654637
R-HSA-9701193	Defective HDR through Homologous Recombination (HRR) due to PALB2 loss of function	1	24	0.00168173	0.828343	0.851808	2	2	0.000147308	9606	Homo sapiens	Rad51b		R-HSA-9704408;R-HSA-9704330
R-HSA-9701192	Defective HDR through Homologous Recombination (HRR) due to BRCA1 loss-of-function	1	24	0.00168173	0.828343	0.851808	1	1	7.3654e-05	9606	Homo sapiens	Rad51b		R-HSA-9701199
R-HSA-9704646	Defective HDR through Homologous Recombination Repair (HRR) due to PALB2 loss of BRCA2/RAD51/RAD51C binding function	1	24	0.00168173	0.828343	0.851808	1	1	7.3654e-05	9606	Homo sapiens	Rad51b		R-HSA-9704408
R-HSA-9704331	Defective HDR through Homologous Recombination Repair (HRR) due to PALB2 loss of BRCA1 binding function	1	24	0.00168173	0.828343	0.851808	1	1	7.3654e-05	9606	Homo sapiens	Rad51b		R-HSA-9704330
R-HSA-9675136	Diseases of DNA Double-Strand Break Repair	1	24	0.00168173	0.828343	0.851808	3	5	0.00036827	9606	Homo sapiens	Rad51b		R-HSA-9701199;R-HSA-9704408;R-HSA-9704330
R-HSA-429958	mRNA decay by 3' to 5' exoribonuclease	1	24	0.00168173	0.828343	0.851808	1	3	0.000220962	9606	Homo sapiens	Tst		R-HSA-430028
R-HSA-2243919	Crosslinking of collagen fibrils	1	24	0.00168173	0.828343	0.851808	3	13	0.000957502	9606	Homo sapiens	Loxl4		R-HSA-2022141;R-HSA-2395340;R-HSA-2002466
R-HSA-8964058	HDL remodeling	1	24	0.00168173	0.828343	0.851808	1	13	0.000957502	9606	Homo sapiens	Apc2		R-HSA-266303
R-HSA-1834941	STING mediated induction of host immune responses	1	24	0.00168173	0.828343	0.851808	1	19	0.00139943	9606	Homo sapiens	Dtx4		R-HSA-2396007
R-HSA-1483255	PI Metabolism	6	112	0.00784808	0.828906	0.851808	9	89	0.0065552	9606	Homo sapiens	Pi4k2b;Gdpd3;Plekha4;Pik3r6;Pik3r1;Ptpn13		R-HSA-1676185;R-HSA-1676109;R-HSA-1676048;R-HSA-8870332;R-HSA-1675813;R-HSA-6814778;R-HSA-1675780;R-HSA-8870489;R-HSA-1675974
R-HSA-9013106	RHOC GTPase cycle	4	79	0.0055357	0.830396	0.851808	2	6	0.000441924	9606	Homo sapiens	Rtkn;Tfrc;Ophn1;Pik3r1		R-HSA-9013111;R-HSA-9013110
R-HSA-5250924	B-WICH complex positively regulates rRNA expression	3	62	0.00434447	0.832429	0.851808	3	3	0.000220962	9606	Homo sapiens	Hist1h2ac;Taf1d;Hist1h4i		R-HSA-5250930;R-HSA-5250947;R-HSA-5250938
R-HSA-1221632	Meiotic synapsis	3	62	0.00434447	0.832429	0.851808	4	6	0.000441924	9606	Homo sapiens	Hist1h2ac;Hist1h4i;Trf		R-HSA-912408;R-HSA-912470;R-HSA-912467;R-HSA-912450
R-HSA-1296072	Voltage gated Potassium channels	2	44	0.00308318	0.832867	0.851808	1	1	7.3654e-05	9606	Homo sapiens	Kcnk2;Kcnb1		R-HSA-1296127
R-HSA-3769402	Deactivation of the beta-catenin transactivating complex	2	44	0.00308318	0.832867	0.851808	5	14	0.00103116	9606	Homo sapiens	Tle2;Sox9		R-HSA-3322434;R-HSA-3361751;R-HSA-3322431;R-HSA-5626938;R-HSA-3322429
R-HSA-419037	NCAM1 interactions	2	44	0.00308318	0.832867	0.851808	3	10	0.00073654	9606	Homo sapiens	Cacna1h;Gfra1		R-HSA-525833;R-HSA-375149;R-HSA-375144
R-HSA-6811558	PI5P, PP2A and IER3 Regulate PI3K/AKT Signaling	7	129	0.00903931	0.83351	0.851808	1	7	0.000515578	9606	Homo sapiens	Btc;Cd86;Epgn;Cd80;Erbb3;Rac2;Pik3r1		R-HSA-2316434
R-HSA-400206	Regulation of lipid metabolism by PPARalpha	10	177	0.0124028	0.83489	0.851808	6	44	0.00324077	9606	Homo sapiens	Glipr1;Cpt1a;Slc27a1;Ahrr;Plin2;Ubxn6		R-HSA-1989772;R-HSA-1989770;R-HSA-1368065;R-HSA-1801587;R-HSA-1989750;R-HSA-1989764
R-HSA-111885	Opioid Signalling	6	113	0.00791816	0.835004	0.851808	22	59	0.00434558	9606	Homo sapiens	Gngt2;44808;Pde4d;Pde1a;Adcy2;Itpr3		R-HSA-167427;R-HSA-167429;R-HSA-170666;R-HSA-392206;R-HSA-112042;R-HSA-167433;R-HSA-170671;R-HSA-112271;R-HSA-170674;R-HSA-169683;R-HSA-111955;R-HSA-170672;R-HSA-167408;R-HSA-169680;R-HSA-111956;R-HSA-170676;R-HSA-170677;R-HSA-167419;R-HSA-111930;R-HSA-111962;R-HSA-170686;R-HSA-170685
R-HSA-5625740	RHO GTPases activate PKNs	4	80	0.00560577	0.837508	0.851808	10	20	0.00147308	9606	Homo sapiens	Hist1h2ac;Hist1h4i;Myh14;Ppp1r12b		R-HSA-5625797;R-HSA-5625796;R-HSA-419232;R-HSA-5671772;R-HSA-5625870;R-HSA-5625774;R-HSA-5625849;R-HSA-5625848;R-HSA-5625784;R-HSA-5625883
R-HSA-449147	Signaling by Interleukins	41	643	0.0450564	0.840101	0.851808	82	493	0.0363114	9606	Homo sapiens	Cd86;Ccr1;Syk;Cd80;F13a1;Il27;Prtn3;Il27ra;Map2k6;Lama5;Vcam1;Csf2rb;44808;Itgb2;Il1f9;Icam1;Bcl2;Lbp;Cxcl1;Ccr5;Pik3r1;Csf3;Foxo3;Ptpn13		R-HSA-727819;R-HSA-6785895;R-HSA-6793958;R-HSA-8950537;R-HSA-912527;R-HSA-508292;R-HSA-6789615;R-HSA-914182;R-HSA-6785898;R-HSA-1295516;R-HSA-8950674;R-HSA-450333;R-HSA-6788346;R-HSA-913424;R-HSA-879917;R-HSA-8950441;R-HSA-448421;R-HSA-6786114;R-HSA-913451;R-HSA-909738;R-HSA-879909;R-HSA-879910;R-HSA-450346;R-HSA-448427;R-HSA-879907;R-HSA-8937656;R-HSA-879934;R-HSA-8950716;R-HSA-879930;R-HSA-8799…
R-HSA-3214815	HDACs deacetylate histones	3	63	0.00441455	0.840298	0.851808	5	5	0.00036827	9606	Homo sapiens	Hist1h2ac;Hist1h4i;Rbp1		R-HSA-3777129;R-HSA-3782637;R-HSA-3782655;R-HSA-9679787;R-HSA-3769447
R-HSA-6811436	COPI-independent Golgi-to-ER retrograde traffic	3	63	0.00441455	0.840298	0.851808	3	7	0.000515578	9606	Homo sapiens	Galnt2;Acp1;Rab6b		R-HSA-8849350;R-HSA-8849348;R-HSA-8849353
R-HSA-5654720	PI-3K cascade:FGFR4	1	25	0.0017518	0.840506	0.851808	7	7	0.000515578	9606	Homo sapiens	Pik3r1		R-HSA-5654662;R-HSA-5654659;R-HSA-177931;R-HSA-5654669;R-HSA-5654717;R-HSA-5654714;R-HSA-5654667
R-HSA-5620916	VxPx cargo-targeting to cilium	1	25	0.0017518	0.840506	0.851808	9	10	0.00073654	9606	Homo sapiens	Cngb1		R-HSA-5623525;R-HSA-5623524;R-HSA-5623527;R-HSA-5620918;R-HSA-5623521;R-HSA-5620914;R-HSA-5623519;R-HSA-5623513;R-HSA-5620921
R-HSA-1362409	Mitochondrial iron-sulfur cluster biogenesis	1	25	0.0017518	0.840506	0.851808	2	6	0.000441924	9606	Homo sapiens	Fdxr		R-HSA-2395517;R-HSA-2395512
R-HSA-6807004	Negative regulation of MET activity	1	25	0.0017518	0.840506	0.851808	2	12	0.000883848	9606	Homo sapiens	Sh3gl3		R-HSA-8875490;R-HSA-8875482
R-HSA-416572	Sema4D induced cell migration and growth-cone collapse	1	25	0.0017518	0.840506	0.851808	1	7	0.000515578	9606	Homo sapiens	Myh14		R-HSA-419197
R-HSA-2022870	Chondroitin sulfate biosynthesis	1	25	0.0017518	0.840506	0.851808	1	9	0.000662886	9606	Homo sapiens	Csgalnact1		R-HSA-1971482
R-HSA-428643	Organic anion transporters	1	25	0.0017518	0.840506	0.851808	1	9	0.000662886	9606	Homo sapiens	Slc17a8		R-HSA-428052
R-HSA-373753	Nephrin family interactions	1	25	0.0017518	0.840506	0.851808	1	13	0.000957502	9606	Homo sapiens	Pik3r1		R-HSA-451758
R-HSA-1912422	Pre-NOTCH Expression and Processing	6	114	0.00798823	0.840927	0.851808	19	38	0.00279885	9606	Homo sapiens	Hist1h2ac;Hist1h4i;Notch3;Pofut1		R-HSA-1912349;R-HSA-1912415;R-HSA-9017835;R-HSA-1912382;R-HSA-1912409;R-HSA-1912379;R-HSA-1912378;R-HSA-1912372;R-HSA-1912374;R-HSA-1912369;R-HSA-9604831;R-HSA-9604829;R-HSA-9604834;R-HSA-1912366;R-HSA-1912362;R-HSA-1912353;R-HSA-1912352;R-HSA-9021364;R-HSA-1912355
R-HSA-202427	Phosphorylation of CD3 and TCR zeta chains	2	45	0.00315325	0.84202	0.851808	4	7	0.000515578	9606	Homo sapiens	Ptpn22;Pag1		R-HSA-8855375;R-HSA-202233;R-HSA-203774;R-HSA-8852200
R-HSA-174824	Plasma lipoprotein assembly, remodeling, and clearance	5	98	0.00686707	0.844554	0.851808	25	85	0.00626059	9606	Homo sapiens	Apc2;Lipc;Pcsk9;Ldlr		R-HSA-8855111;R-HSA-174657;R-HSA-6784738;R-HSA-174660;R-HSA-171141;R-HSA-6784622;R-HSA-5694109;R-HSA-171087;R-HSA-6785213;R-HSA-174808;R-HSA-8855131;R-HSA-8855130;R-HSA-174690;R-HSA-171106;R-HSA-174624;R-HSA-174757;R-HSA-174706;R-HSA-171122;R-HSA-171059;R-HSA-6784735;R-HSA-6784734;R-HSA-6785181;R-HSA-266303;R-HSA-6785178;R-HSA-6784729
R-HSA-73772	RNA Polymerase I Promoter Escape	3	64	0.00448462	0.847846	0.851808	2	2	0.000147308	9606	Homo sapiens	Hist1h2ac;Taf1d;Hist1h4i		R-HSA-73769;R-HSA-74986
R-HSA-193648	NRAGE signals death through JNK	3	64	0.00448462	0.847846	0.851808	4	7	0.000515578	9606	Homo sapiens	Ngfr;Arhgef16;Ngef		R-HSA-205115;R-HSA-205039;R-HSA-204958;R-HSA-205132
R-HSA-109606	Intrinsic Pathway for Apoptosis	3	64	0.00448462	0.847846	0.851808	6	62	0.00456655	9606	Homo sapiens	Bcl2;Bmf		R-HSA-114352;R-HSA-508163;R-HSA-139908;R-HSA-139909;R-HSA-139897;R-HSA-6790025
R-HSA-5620912	Anchoring of the basal body to the plasma membrane	5	99	0.00693715	0.850615	0.851808	8	9	0.000662886	9606	Homo sapiens	Nphp4;Tctn1;Kif24;Nphp1;Ninl		R-HSA-5626228;R-HSA-5626227;R-HSA-5626220;R-HSA-5626223;R-HSA-5626681;R-HSA-5617816;R-HSA-5626699;R-HSA-5638009
R-HSA-8953750	Transcriptional Regulation by E2F6	2	46	0.00322332	0.850717	0.851808	2	33	0.00243058	9606	Homo sapiens	Uxt		R-HSA-9007465;R-HSA-9007464
R-HSA-392170	ADP signalling through P2Y purinoceptor 12	1	26	0.00182188	0.851808	0.851808	3	4	0.000294616	9606	Homo sapiens	Gngt2		R-HSA-392195;R-HSA-392187;R-HSA-392202
R-HSA-190241	FGFR2 ligand binding and activation	1	26	0.00182188	0.851808	0.851808	2	5	0.00036827	9606	Homo sapiens	Fgfbp1		R-HSA-5656070;R-HSA-190260
R-HSA-264642	Acetylcholine Neurotransmitter Release Cycle	1	26	0.00182188	0.851808	0.851808	2	6	0.000441924	9606	Homo sapiens	Rbp1		R-HSA-372529;R-HSA-372505
R-HSA-70221	Glycogen breakdown (glycogenolysis)	1	26	0.00182188	0.851808	0.851808	3	15	0.00110481	9606	Homo sapiens	Pygl		R-HSA-71588;R-HSA-71590;R-HSA-453339
R-HSA-162594	Early Phase of HIV Life Cycle	1	26	0.00182188	0.851808	0.851808	6	39	0.0028725	9606	Homo sapiens	Ccr5		R-HSA-164515;R-HSA-164500;R-HSA-164507;R-HSA-164521;R-HSA-164524;R-HSA-164508
R-HSA-111931	PKA-mediated phosphorylation of CREB	1	26	0.00182188	0.851808	0.851808	1	7	0.000515578	9606	Homo sapiens	Adcy2		R-HSA-111930
R-HSA-5637815	Signaling by Ligand-Responsive EGFR Variants in Cancer	1	26	0.00182188	0.851808	0.851808	2	23	0.00169404	9606	Homo sapiens	Pik3r1		R-HSA-1226014;R-HSA-1226012
R-HSA-1236382	Constitutive Signaling by Ligand-Responsive EGFR Cancer Variants	1	26	0.00182188	0.851808	0.851808	2	23	0.00169404	9606	Homo sapiens	Pik3r1		R-HSA-1226014;R-HSA-1226012
R-HSA-5173105	O-linked glycosylation	7	133	0.0093196	0.855038	0.855038	9	28	0.00206231	9606	Homo sapiens	Adamts10;Sbspon;Dag1;Thsd7a;B3gnt2;Galnt2;Cfp		R-HSA-5615637;R-HSA-5173005;R-HSA-5173192;R-HSA-913675;R-HSA-914010;R-HSA-8931648;R-HSA-5617037;R-HSA-8879117;R-HSA-8931653
R-HSA-429914	Deadenylation-dependent mRNA decay	3	65	0.00455469	0.855082	0.855082	5	10	0.00073654	9606	Homo sapiens	Tst;Eif4a2;Tifa		R-HSA-430021;R-HSA-429955;R-HSA-8941312;R-HSA-430028;R-HSA-429992
R-HSA-73884	Base Excision Repair	5	100	0.00700722	0.856479	0.856479	18	107	0.00788098	9606	Homo sapiens	Hist1h2ac;Hist1h4i;Tdg;Parp2;Trf		R-HSA-5651828;R-HSA-110210;R-HSA-5649873;R-HSA-110219;R-HSA-110218;R-HSA-9629497;R-HSA-5649883;R-HSA-5651739;R-HSA-110159;R-HSA-9629372;R-HSA-110350;R-HSA-110158;R-HSA-9629373;R-HSA-9629216;R-HSA-9629483;R-HSA-9629195;R-HSA-110234;R-HSA-5651723
R-HSA-3371568	Attenuation phase	2	47	0.00329339	0.858975	0.858975	3	5	0.00036827	9606	Homo sapiens	Hsph1;Cryba4		R-HSA-3371554;R-HSA-5082369;R-HSA-5082384
R-HSA-1251985	Nuclear signaling by ERBB4	2	47	0.00329339	0.858975	0.858975	2	34	0.00250424	9606	Homo sapiens	Btc;Wwox		R-HSA-1251992;R-HSA-1253343
R-HSA-9725370	Signaling by ALK fusions and activated point mutants	3	66	0.00462476	0.862015	0.862015	5	29	0.00213597	9606	Homo sapiens	Hip1;Wdcp;Pik3r1		R-HSA-9712084;R-HSA-9700181;R-HSA-9700179;R-HSA-9712083;R-HSA-9712078
R-HSA-9700206	Signaling by ALK in cancer	3	66	0.00462476	0.862015	0.862015	6	37	0.0027252	9606	Homo sapiens	Hip1;Wdcp;Pik3r1		R-HSA-9712084;R-HSA-9700181;R-HSA-9700179;R-HSA-9700131;R-HSA-9712083;R-HSA-9712078
R-HSA-70263	Gluconeogenesis	3	66	0.00462476	0.862015	0.862015	2	26	0.001915	9606	Homo sapiens	Slc37a2;Slc37a1;Aldoc		R-HSA-3257122;R-HSA-71495
R-HSA-193048	Androgen biosynthesis	1	27	0.00189195	0.862309	0.862309	6	9	0.000662886	9606	Homo sapiens	44808		R-HSA-193073;R-HSA-9705713;R-HSA-9705714;R-HSA-193064;R-HSA-469659;R-HSA-193070
R-HSA-450302	activated TAK1 mediates p38 MAPK activation	1	27	0.00189195	0.862309	0.862309	3	5	0.00036827	9606	Homo sapiens	Map2k6		R-HSA-450333;R-HSA-450346;R-HSA-450296
R-HSA-9671555	Signaling by PDGFR in disease	1	27	0.00189195	0.862309	0.862309	4	24	0.0017677	9606	Homo sapiens	Pik3r1		R-HSA-9672162;R-HSA-9672178;R-HSA-9672177;R-HSA-9672172
R-HSA-8876384	Listeria monocytogenes entry into host cells	1	27	0.00189195	0.862309	0.862309	2	13	0.000957502	9606	Homo sapiens	Sh3gl3		R-HSA-8876262;R-HSA-8876255
R-HSA-2995383	Initiation of Nuclear Envelope (NE) Reformation	1	27	0.00189195	0.862309	0.862309	1	7	0.000515578	9606	Homo sapiens	Vrk2		R-HSA-2995389
R-HSA-9034015	Signaling by NTRK3 (TRKC)	1	27	0.00189195	0.862309	0.862309	2	19	0.00139943	9606	Homo sapiens	Pik3r1		R-HSA-9603445;R-HSA-9603407
R-HSA-427389	ERCC6 (CSB) and EHMT2 (G9a) positively regulate rRNA expression	2	48	0.00336346	0.866813	0.866813	2	4	0.000294616	9606	Homo sapiens	Hist1h2ac;Hist1h4i		R-HSA-427383;R-HSA-427336
R-HSA-73933	Resolution of Abasic Sites (AP sites)	2	48	0.00336346	0.866813	0.866813	6	43	0.00316712	9606	Homo sapiens	Tdg;Parp2		R-HSA-5651828;R-HSA-5649873;R-HSA-5651723;R-HSA-5649883;R-HSA-5651739;R-HSA-110350
R-HSA-111996	Ca-dependent events	2	48	0.00336346	0.866813	0.866813	3	27	0.00198866	9606	Homo sapiens	Pde1a;Adcy2		R-HSA-111955;R-HSA-111956;R-HSA-111930
R-HSA-8853884	Transcriptional Regulation by VENTX	2	48	0.00336346	0.866813	0.866813	1	13	0.000957502	9606	Homo sapiens	Apc2;Anapc10		R-HSA-3790130
R-HSA-2682334	EPH-Ephrin signaling	5	102	0.00714736	0.867631	0.867631	18	56	0.00412462	9606	Homo sapiens	Efna2;Myh14;Pak3;Epha3;Ngef		R-HSA-3928602;R-HSA-3928607;R-HSA-3928604;R-HSA-3928625;R-HSA-3928597;R-HSA-3928628;R-HSA-3928660;R-HSA-3928651;R-HSA-4093327;R-HSA-3928616;R-HSA-3928648;R-HSA-3928584;R-HSA-3928591;R-HSA-3928642;R-HSA-3928578;R-HSA-3928641;R-HSA-3928640;R-HSA-3928646
R-HSA-73856	RNA Polymerase II Transcription Termination	3	67	0.00469484	0.868655	0.868655	3	4	0.000294616	9606	Homo sapiens	Tifa;Rbp1;Snrpf		R-HSA-77586;R-HSA-72180;R-HSA-111437
R-HSA-201722	Formation of the beta-catenin:TCF transactivating complex	3	67	0.00469484	0.868655	0.868655	3	13	0.000957502	9606	Homo sapiens	Hist1h2ac;Tle2;Hist1h4i		R-HSA-3299569;R-HSA-3364026;R-HSA-3451147
R-HSA-112043	PLC beta mediated events	3	67	0.00469484	0.868655	0.868655	5	32	0.00235693	9606	Homo sapiens	Pde1a;Adcy2;Itpr3		R-HSA-169683;R-HSA-111955;R-HSA-169680;R-HSA-111956;R-HSA-111930
R-HSA-9013507	NOTCH3 Activation and Transmission of Signal to the Nucleus	1	28	0.00196202	0.872068	0.872068	15	15	0.00110481	9606	Homo sapiens	Notch3		R-HSA-9013069;R-HSA-9018573;R-HSA-9018572;R-HSA-157124;R-HSA-2168136;R-HSA-9017797;R-HSA-9013284;R-HSA-157100;R-HSA-9017817;R-HSA-157937;R-HSA-9017855;R-HSA-9013361;R-HSA-9021520;R-HSA-9021523;R-HSA-157145
R-HSA-5654689	PI-3K cascade:FGFR1	1	28	0.00196202	0.872068	0.872068	7	7	0.000515578	9606	Homo sapiens	Pik3r1		R-HSA-5654692;R-HSA-5654596;R-HSA-5654594;R-HSA-5654690;R-HSA-5654592;R-HSA-5654591;R-HSA-177931
R-HSA-75067	Processing of Capped Intronless Pre-mRNA	1	28	0.00196202	0.872068	0.872068	4	10	0.00073654	9606	Homo sapiens	Snrpf		R-HSA-77585;R-HSA-77586;R-HSA-111437;R-HSA-111438
R-HSA-212676	Dopamine Neurotransmitter Release Cycle	1	28	0.00196202	0.872068	0.872068	2	5	0.00036827	9606	Homo sapiens	Rbp1		R-HSA-380869;R-HSA-380574
R-HSA-168799	Neurotoxicity of clostridium toxins	1	28	0.00196202	0.872068	0.872068	9	40	0.00294616	9606	Homo sapiens	Sv2c		R-HSA-5250880;R-HSA-5250884;R-HSA-5244424;R-HSA-5250600;R-HSA-5250616;R-HSA-5250875;R-HSA-5244428;R-HSA-5244415;R-HSA-5250607
R-HSA-9670439	Signaling by phosphorylated juxtamembrane, extracellular and kinase domain KIT mutants	1	28	0.00196202	0.872068	0.872068	2	11	0.000810194	9606	Homo sapiens	Pik3r1		R-HSA-9670433;R-HSA-9670431
R-HSA-200425	Carnitine metabolism	1	28	0.00196202	0.872068	0.872068	1	9	0.000662886	9606	Homo sapiens	Cpt1a		R-HSA-200406
R-HSA-9669938	Signaling by KIT in disease	1	28	0.00196202	0.872068	0.872068	2	25	0.00184135	9606	Homo sapiens	Pik3r1		R-HSA-9670433;R-HSA-9670431
R-HSA-5625886	Activated PKN1 stimulates transcription of AR (androgen receptor) regulated genes KLK2 and KLK3	2	49	0.00343354	0.87425	0.87425	8	11	0.000810194	9606	Homo sapiens	Hist1h2ac;Hist1h4i		R-HSA-5625797;R-HSA-5625796;R-HSA-5625870;R-HSA-5625774;R-HSA-5625849;R-HSA-5625848;R-HSA-5625784;R-HSA-5625883
R-HSA-196741	Cobalamin (Cbl, vitamin B12) transport and metabolism	2	49	0.00343354	0.87425	0.87425	6	29	0.00213597	9606	Homo sapiens	Tcn2;Mmab		R-HSA-3000109;R-HSA-3159253;R-HSA-3000122;R-HSA-3000074;R-HSA-3000263;R-HSA-3000112
R-HSA-5675221	Negative regulation of MAPK pathway	2	49	0.00343354	0.87425	0.87425	2	17	0.00125212	9606	Homo sapiens	Dusp2;Dusp8		R-HSA-5675376;R-HSA-5675373
R-HSA-199418	Negative regulation of the PI3K/AKT network	7	137	0.00959989	0.874251	0.874251	1	10	0.00073654	9606	Homo sapiens	Btc;Cd86;Epgn;Cd80;Erbb3;Rac2;Pik3r1		R-HSA-2316434
R-HSA-1227986	Signaling by ERBB2	3	68	0.00476491	0.875011	0.875011	28	46	0.00338808	9606	Homo sapiens	Btc;Erbb3;Pik3r1		R-HSA-1250195;R-HSA-8848005;R-HSA-6785636;R-HSA-1358801;R-HSA-1306965;R-HSA-1306969;R-HSA-1250463;R-HSA-1250462;R-HSA-1306972;R-HSA-1358790;R-HSA-6785648;R-HSA-1963589;R-HSA-1358798;R-HSA-1306953;R-HSA-1247497;R-HSA-1358792;R-HSA-1250189;R-HSA-1306957;R-HSA-1963586;R-HSA-1963581;R-HSA-1963582;R-HSA-1250486;R-HSA-1963578;R-HSA-1306979;R-HSA-1963563;R-HSA-1250346;R-HSA-8863804;R-HSA-8847995
R-HSA-983189	Kinesins	3	68	0.00476491	0.875011	0.875011	3	14	0.00103116	9606	Homo sapiens	Klc3;Kif1a		R-HSA-983259;R-HSA-983194;R-HSA-983266
R-HSA-1660662	Glycosphingolipid metabolism	4	86	0.00602621	0.875107	0.875107	5	32	0.00235693	9606	Homo sapiens	Galc;Cerk;Hexa;Neu1		R-HSA-1605595;R-HSA-1605724;R-HSA-1638845;R-HSA-1605632;R-HSA-1606564
R-HSA-9018519	Estrogen-dependent gene expression	8	154	0.0107911	0.876393	0.876393	17	66	0.00486116	9606	Homo sapiens	Hist1h2ac;Ctsd;Hist1h4i;Bcl2;Kdm4b		R-HSA-9009065;R-HSA-9011949;R-HSA-9011981;R-HSA-9011983;R-HSA-9011950;R-HSA-9012000;R-HSA-9023840;R-HSA-9009378;R-HSA-9011941;R-HSA-9023845;R-HSA-9011975;R-HSA-9023846;R-HSA-9009371;R-HSA-9011966;R-HSA-9011985;R-HSA-9011952;R-HSA-9011984
R-HSA-194138	Signaling by VEGF	7	138	0.00966996	0.878711	0.878711	14	86	0.00633424	9606	Homo sapiens	Nrp2;Ncf1;Ncf4;Elmo1;Pik3r1;Pak3;Itpr3		R-HSA-5218827;R-HSA-5218852;R-HSA-5218819;R-HSA-5357472;R-HSA-169683;R-HSA-169680;R-HSA-5357477;R-HSA-5357445;R-HSA-5218811;R-HSA-5218841;R-HSA-5357479;R-HSA-195418;R-HSA-5218839;R-HSA-5357483
R-HSA-8956321	Nucleotide salvage	3	69	0.00483498	0.881093	0.881093	4	22	0.00162039	9606	Homo sapiens	Tymp;Pnp		R-HSA-112033;R-HSA-112034;R-HSA-74372;R-HSA-112266
R-HSA-211935	Fatty acids	1	29	0.00203209	0.881135	0.881135	2	4	0.000294616	9606	Homo sapiens	Cyp4b1		R-HSA-76466;R-HSA-211924
R-HSA-1855167	Synthesis of pyrophosphates in the cytosol	1	29	0.00203209	0.881135	0.881135	5	15	0.00110481	9606	Homo sapiens	Ip6k3		R-HSA-1855193;R-HSA-1855194;R-HSA-1855227;R-HSA-1855158;R-HSA-1855223
R-HSA-446210	Synthesis of UDP-N-acetyl-glucosamine	1	29	0.00203209	0.881135	0.881135	1	7	0.000515578	9606	Homo sapiens	Amdhd2		R-HSA-6803789
R-HSA-194002	Glucocorticoid biosynthesis	1	29	0.00203209	0.881135	0.881135	1	9	0.000662886	9606	Homo sapiens	44808		R-HSA-193997
R-HSA-2024101	CS/DS degradation	1	29	0.00203209	0.881135	0.881135	1	10	0.00073654	9606	Homo sapiens	Hexa		R-HSA-2105001
R-HSA-209968	Thyroxine biosynthesis	1	29	0.00203209	0.881135	0.881135	1	11	0.000810194	9606	Homo sapiens	Dio2		R-HSA-209772
R-HSA-5674400	Constitutive Signaling by AKT1 E17K in Cancer	1	29	0.00203209	0.881135	0.881135	1	18	0.00132577	9606	Homo sapiens	Foxo3		R-HSA-2399992
R-HSA-168898	Toll-like Receptor Cascades	10	188	0.0131736	0.882032	0.882032	50	185	0.013626	9606	Homo sapiens	Itgb2;Unc93b1;Mal;Tlr8;Tlr7;Lbp;S100a9;Map2k6;Ly86		R-HSA-975118;R-HSA-975115;R-HSA-975111;R-HSA-166286;R-HSA-975106;R-HSA-166284;R-HSA-1678998;R-HSA-975134;R-HSA-2559414;R-HSA-166038;R-HSA-450333;R-HSA-975125;R-HSA-166041;R-HSA-9679029;R-HSA-450346;R-HSA-167983;R-HSA-937022;R-HSA-8869683;R-HSA-975160;R-HSA-166072;R-HSA-975156;R-HSA-166082;R-HSA-975180;R-HSA-5432849;R-HSA-2201316;R-HSA-2559456;R-HSA-166091;R-HSA-975175;R-HSA-2201322;R-HSA-975170;R…
R-HSA-382556	ABC-family proteins mediated transport	6	122	0.00854881	0.882327	0.882327	7	27	0.00198866	9606	Homo sapiens	Abcc4;Abcd2;Abcb6;Derl3;Derl1		R-HSA-8866551;R-HSA-382613;R-HSA-1454916;R-HSA-8866546;R-HSA-8866542;R-HSA-382575;R-HSA-1369065
R-HSA-5654738	Signaling by FGFR2	4	88	0.00616635	0.88585	0.88585	12	46	0.00338808	9606	Homo sapiens	Fgfbp1;Esrp2;Esrp1;Pik3r1		R-HSA-6803527;R-HSA-5654614;R-HSA-5656070;R-HSA-5654612;R-HSA-190260;R-HSA-5654622;R-HSA-177931;R-HSA-6803838;R-HSA-5654620;R-HSA-6803836;R-HSA-5654701;R-HSA-5654697
R-HSA-69231	Cyclin D associated events in G1	2	51	0.00357368	0.887986	0.887986	9	15	0.00110481	9606	Homo sapiens	Ccnd2;Cdkn1c		R-HSA-8941915;R-HSA-8942607;R-HSA-9018017;R-HSA-69227;R-HSA-8942803;R-HSA-1226094;R-HSA-8942836;R-HSA-1226095;R-HSA-8941895
R-HSA-69236	G1 Phase	2	51	0.00357368	0.887986	0.887986	9	15	0.00110481	9606	Homo sapiens	Ccnd2;Cdkn1c		R-HSA-8941915;R-HSA-8942607;R-HSA-9018017;R-HSA-69227;R-HSA-8942803;R-HSA-1226094;R-HSA-8942836;R-HSA-1226095;R-HSA-8941895
R-HSA-8854214	TBC/RABGAPs	2	51	0.00357368	0.887986	0.887986	2	14	0.00103116	9606	Homo sapiens	Rab8b;Rab6b		R-HSA-8854182;R-HSA-8854303
R-HSA-211999	CYP2E1 reactions	1	30	0.00210217	0.88956	0.88956	6	6	0.000441924	9606	Homo sapiens	Cyp2s1		R-HSA-76416;R-HSA-76354;R-HSA-76434;R-HSA-76475;R-HSA-76397;R-HSA-143468
R-HSA-5693554	Resolution of D-loop Structures through Synthesis-Dependent Strand Annealing (SDSA)	1	30	0.00210217	0.88956	0.88956	1	1	7.3654e-05	9606	Homo sapiens	Rad51b		R-HSA-5693589
R-HSA-428930	Thromboxane signalling through TP receptor	1	30	0.00210217	0.88956	0.88956	6	8	0.000589232	9606	Homo sapiens	Gngt2		R-HSA-428918;R-HSA-428917;R-HSA-428752;R-HSA-428750;R-HSA-428909;R-HSA-428749
R-HSA-418592	ADP signalling through P2Y purinoceptor 1	1	30	0.00210217	0.88956	0.88956	3	7	0.000515578	9606	Homo sapiens	Gngt2		R-HSA-418581;R-HSA-418579;R-HSA-418576
R-HSA-181430	Norepinephrine Neurotransmitter Release Cycle	1	30	0.00210217	0.88956	0.88956	2	6	0.000441924	9606	Homo sapiens	Rbp1		R-HSA-374899;R-HSA-374922
R-HSA-8862803	Deregulated CDK5 triggers multiple neurodegenerative pathways in Alzheimer's disease models	1	30	0.00210217	0.88956	0.88956	6	22	0.00162039	9606	Homo sapiens	Foxo3		R-HSA-8870710;R-HSA-8870628;R-HSA-8870703;R-HSA-8870686;R-HSA-8870558;R-HSA-8870698
R-HSA-8863678	Neurodegenerative Diseases	1	30	0.00210217	0.88956	0.88956	6	22	0.00162039	9606	Homo sapiens	Foxo3		R-HSA-8870710;R-HSA-8870628;R-HSA-8870703;R-HSA-8870686;R-HSA-8870558;R-HSA-8870698
R-HSA-70921	Histidine catabolism	1	30	0.00210217	0.88956	0.88956	1	8	0.000589232	9606	Homo sapiens	Hdc		R-HSA-977301
R-HSA-9703648	Signaling by FLT3 ITD and TKD mutants	1	30	0.00210217	0.88956	0.88956	2	24	0.0017677	9606	Homo sapiens	Pik3r1		R-HSA-9698179;R-HSA-9698174
R-HSA-8963898	Plasma lipoprotein assembly	1	30	0.00210217	0.88956	0.88956	1	19	0.00139943	9606	Homo sapiens	Apc2		R-HSA-174660
R-HSA-114608	Platelet degranulation	7	141	0.00988018	0.891308	0.891308	4	11	0.000810194	9606	Homo sapiens	Chid1;Tmsb4x;Abcc4;Islr;F13a1;Timp3;F5		R-HSA-429157;R-HSA-481009;R-HSA-351341;R-HSA-481007
R-HSA-8848021	Signaling by PTK6	3	71	0.00497512	0.892472	0.892472	4	53	0.00390366	9606	Homo sapiens	Btc;Erbb3;Elmo1		R-HSA-8848005;R-HSA-8848611;R-HSA-8847995;R-HSA-8848618
R-HSA-9006927	Signaling by Non-Receptor Tyrosine Kinases	3	71	0.00497512	0.892472	0.892472	4	53	0.00390366	9606	Homo sapiens	Btc;Erbb3;Elmo1		R-HSA-8848005;R-HSA-8848611;R-HSA-8847995;R-HSA-8848618
R-HSA-2559586	DNA Damage/Telomere Stress Induced Senescence	3	71	0.00497512	0.892472	0.892472	1	18	0.00132577	9606	Homo sapiens	Hist1h2ac;Hist1h4i;Trf		R-HSA-3785711
R-HSA-9710421	Defective pyroptosis	2	52	0.00364375	0.894321	0.894321	1	3	0.000220962	9606	Homo sapiens	Hist1h2ac;Hist1h4i		R-HSA-9710490
R-HSA-2142691	Synthesis of Leukotrienes (LT) and Eoxins (EX)	2	52	0.00364375	0.894321	0.894321	4	19	0.00139943	9606	Homo sapiens	Cyp4b1;Ggt1		R-HSA-2161792;R-HSA-2161745;R-HSA-211873;R-HSA-266046
R-HSA-1614558	Degradation of cysteine and homocysteine	2	52	0.00364375	0.894321	0.894321	3	23	0.00169404	9606	Homo sapiens	Tst;Suox		R-HSA-1614618;R-HSA-9013198;R-HSA-1614544
R-HSA-8864260	Transcriptional regulation by the AP-2 (TFAP2) family of transcription factors	2	52	0.00364375	0.894321	0.894321	3	44	0.00324077	9606	Homo sapiens	Wwox;Kctd1		R-HSA-8864343;R-HSA-8864577;R-HSA-8864569
R-HSA-1483249	Inositol phosphate metabolism	4	90	0.0063065	0.895778	0.895778	9	71	0.00522943	9606	Homo sapiens	Itpkc;Minpp1;Ip6k3		R-HSA-1855193;R-HSA-1855225;R-HSA-1855194;R-HSA-1855227;R-HSA-1855163;R-HSA-1855158;R-HSA-1855223;R-HSA-1855200;R-HSA-1855153
R-HSA-5654695	PI-3K cascade:FGFR2	1	31	0.00217224	0.897389	0.897389	7	7	0.000515578	9606	Homo sapiens	Pik3r1		R-HSA-5654614;R-HSA-5654612;R-HSA-5654622;R-HSA-177931;R-HSA-5654620;R-HSA-5654701;R-HSA-5654697
R-HSA-174411	Polymerase switching on the C-strand of the telomere	1	31	0.00217224	0.897389	0.897389	4	6	0.000441924	9606	Homo sapiens	Trf		R-HSA-174448;R-HSA-174439;R-HSA-174452;R-HSA-174447
R-HSA-5601884	PIWI-interacting RNA (piRNA) biogenesis	1	31	0.00217224	0.897389	0.897389	4	15	0.00110481	9606	Homo sapiens	Piwil4		R-HSA-5629237;R-HSA-5601919;R-HSA-5601897;R-HSA-5601883
R-HSA-1482801	Acyl chain remodelling of PS	1	31	0.00217224	0.897389	0.897389	2	8	0.000589232	9606	Homo sapiens	Mboat1		R-HSA-1482691;R-HSA-1482636
R-HSA-5218921	VEGFR2 mediated cell proliferation	1	31	0.00217224	0.897389	0.897389	2	12	0.000883848	9606	Homo sapiens	Itpr3		R-HSA-169683;R-HSA-169680
R-HSA-203927	MicroRNA (miRNA) biogenesis	1	31	0.00217224	0.897389	0.897389	1	8	0.000589232	9606	Homo sapiens	Bcdin3d		R-HSA-5578717
R-HSA-1266695	Interleukin-7 signaling	1	31	0.00217224	0.897389	0.897389	2	26	0.001915	9606	Homo sapiens	Pik3r1		R-HSA-8983003;R-HSA-1295516
R-HSA-400685	Sema4D in semaphorin signaling	1	31	0.00217224	0.897389	0.897389	1	13	0.000957502	9606	Homo sapiens	Myh14		R-HSA-419197
R-HSA-1660516	Synthesis of PIPs at the early endosome membrane	1	31	0.00217224	0.897389	0.897389	1	13	0.000957502	9606	Homo sapiens	Pi4k2b		R-HSA-1675974
R-HSA-112040	G-protein mediated events	3	73	0.00511527	0.902865	0.902865	14	41	0.00301981	9606	Homo sapiens	Pde1a;Adcy2;Itpr3		R-HSA-170666;R-HSA-392206;R-HSA-170671;R-HSA-170674;R-HSA-169683;R-HSA-111955;R-HSA-170672;R-HSA-169680;R-HSA-111956;R-HSA-170676;R-HSA-170677;R-HSA-111930;R-HSA-170686;R-HSA-170685
R-HSA-8856828	Clathrin-mediated endocytosis	8	161	0.0112816	0.903233	0.903233	19	35	0.00257789	9606	Homo sapiens	Btc;Hip1;Scarb2;Epgn;Tfrc;Sh3gl3;Ldlr;Dab2		R-HSA-8868071;R-HSA-8866279;R-HSA-8868230;R-HSA-8866277;R-HSA-8863471;R-HSA-8867756;R-HSA-8868236;R-HSA-8868651;R-HSA-8867754;R-HSA-8868072;R-HSA-8868648;R-HSA-8868661;R-HSA-8868660;R-HSA-8868659;R-HSA-8868658;R-HSA-8863472;R-HSA-8869438;R-HSA-8871194;R-HSA-8871193
R-HSA-4420097	VEGFA-VEGFR2 Pathway	6	127	0.00889917	0.903282	0.903282	13	79	0.00581866	9606	Homo sapiens	Ncf1;Ncf4;Elmo1;Pik3r1;Pak3;Itpr3		R-HSA-5218827;R-HSA-5218852;R-HSA-5218819;R-HSA-5357472;R-HSA-169683;R-HSA-169680;R-HSA-5357477;R-HSA-5357445;R-HSA-5218811;R-HSA-5218841;R-HSA-5357479;R-HSA-5218839;R-HSA-5357483
R-HSA-2980736	Peptide hormone metabolism	6	127	0.00889917	0.903282	0.903282	7	63	0.0046402	9606	Homo sapiens	Ctsd;44808;Inhba;Cma1;Gata4;Cpb1		R-HSA-2022383;R-HSA-265301;R-HSA-2022412;R-HSA-400500;R-HSA-2028294;R-HSA-378975;R-HSA-2022403
R-HSA-400042	Adrenaline,noradrenaline inhibits insulin secretion	1	32	0.00224231	0.904663	0.904663	4	6	0.000441924	9606	Homo sapiens	Gngt2		R-HSA-400037;R-HSA-400097;R-HSA-400046;R-HSA-400092
R-HSA-2122948	Activated NOTCH1 Transmits Signal to the Nucleus	1	32	0.00224231	0.904663	0.904663	9	21	0.00154673	9606	Homo sapiens	Dtx4		R-HSA-1980125;R-HSA-1980109;R-HSA-1912398;R-HSA-1980122;R-HSA-1980123;R-HSA-1980118;R-HSA-1912357;R-HSA-1980112;R-HSA-373706
R-HSA-5689901	Metalloprotease DUBs	1	32	0.00224231	0.904663	0.904663	2	6	0.000441924	9606	Homo sapiens	Hist1h2ac		R-HSA-5691381;R-HSA-5691411
R-HSA-110373	Resolution of AP sites via the multiple-nucleotide patch replacement pathway	1	32	0.00224231	0.904663	0.904663	5	19	0.00139943	9606	Homo sapiens	Parp2		R-HSA-5651828;R-HSA-5649873;R-HSA-5651723;R-HSA-5649883;R-HSA-5651739
R-HSA-210500	Glutamate Neurotransmitter Release Cycle	1	32	0.00224231	0.904663	0.904663	2	8	0.000589232	9606	Homo sapiens	Rbp1		R-HSA-210426;R-HSA-210430
R-HSA-9703465	Signaling by FLT3 fusion proteins	1	32	0.00224231	0.904663	0.904663	2	18	0.00132577	9606	Homo sapiens	Pik3r1		R-HSA-9703439;R-HSA-9703434
R-HSA-8934593	Regulation of RUNX1 Expression and Activity	1	32	0.00224231	0.904663	0.904663	2	19	0.00139943	9606	Homo sapiens	Ccnd2		R-HSA-8938867;R-HSA-8865320
R-HSA-2046105	Linoleic acid (LA) metabolism	1	32	0.00224231	0.904663	0.904663	1	10	0.00073654	9606	Homo sapiens	Abcd2		R-HSA-2046093
R-HSA-1660514	Synthesis of PIPs at the Golgi membrane	1	32	0.00224231	0.904663	0.904663	1	11	0.000810194	9606	Homo sapiens	Pi4k2b		R-HSA-1676185
R-HSA-606279	Deposition of new CENPA-containing nucleosomes at the centromere	2	54	0.0037839	0.906001	0.906001	3	4	0.000294616	9606	Homo sapiens	Hist1h2ac;Hist1h4i		R-HSA-606287;R-HSA-606289;R-HSA-606326
R-HSA-774815	Nucleosome assembly	2	54	0.0037839	0.906001	0.906001	3	4	0.000294616	9606	Homo sapiens	Hist1h2ac;Hist1h4i		R-HSA-606287;R-HSA-606289;R-HSA-606326
R-HSA-9664424	Cell recruitment (pro-inflammatory response)	2	54	0.0037839	0.906001	0.906001	4	23	0.00169404	9606	Homo sapiens	Pycard;Mefv		R-HSA-844612;R-HSA-879221;R-HSA-877361;R-HSA-844610
R-HSA-9660826	Purinergic signaling in leishmaniasis infection	2	54	0.0037839	0.906001	0.906001	4	23	0.00169404	9606	Homo sapiens	Pycard;Mefv		R-HSA-844612;R-HSA-879221;R-HSA-877361;R-HSA-844610
R-HSA-75153	Apoptotic execution phase	2	54	0.0037839	0.906001	0.906001	2	57	0.00419828	9606	Homo sapiens	Dsp;Pkp1		R-HSA-201636;R-HSA-201595
R-HSA-2299718	Condensation of Prophase Chromosomes	2	55	0.00385397	0.911378	0.911378	8	10	0.00073654	9606	Homo sapiens	Hist1h2ac;Hist1h4i		R-HSA-2245218;R-HSA-2288097;R-HSA-2301205;R-HSA-2294580;R-HSA-2172678;R-HSA-2294600;R-HSA-2294574;R-HSA-2294590
R-HSA-3928665	EPH-ephrin mediated repulsion of cells	2	55	0.00385397	0.911378	0.911378	6	9	0.000662886	9606	Homo sapiens	Efna2;Epha3		R-HSA-4093327;R-HSA-3928607;R-HSA-3928604;R-HSA-3928642;R-HSA-3928628;R-HSA-3928660
R-HSA-6811440	Retrograde transport at the Trans-Golgi-Network	2	55	0.00385397	0.911378	0.911378	6	20	0.00147308	9606	Homo sapiens	Usp6nl;Rab6b		R-HSA-6811431;R-HSA-6811429;R-HSA-6811428;R-HSA-8847537;R-HSA-8847534;R-HSA-6814682
R-HSA-3560782	Diseases associated with glycosaminoglycan metabolism	2	55	0.00385397	0.911378	0.911378	8	29	0.00213597	9606	Homo sapiens	Hexa;Fmod		R-HSA-9035976;R-HSA-3656230;R-HSA-9035978;R-HSA-3656259;R-HSA-9035949;R-HSA-3656258;R-HSA-9035950;R-HSA-3656269
R-HSA-174414	Processive synthesis on the C-strand of the telomere	1	33	0.00231238	0.911422	0.911422	7	7	0.000515578	9606	Homo sapiens	Trf		R-HSA-174451;R-HSA-174438;R-HSA-174456;R-HSA-174441;R-HSA-174446;R-HSA-174444;R-HSA-174445
R-HSA-2173795	Downregulation of SMAD2/3:SMAD4 transcriptional activity	1	33	0.00231238	0.911422	0.911422	19	25	0.00184135	9606	Homo sapiens	Smad2		R-HSA-2187395;R-HSA-2187330;R-HSA-870538;R-HSA-2176491;R-HSA-2179274;R-HSA-173481;R-HSA-173545;R-HSA-2179276;R-HSA-2186607;R-HSA-2186741;R-HSA-2176503;R-HSA-2176502;R-HSA-2186747;R-HSA-209055;R-HSA-2187325;R-HSA-870449;R-HSA-2187388;R-HSA-9736970;R-HSA-2106591
R-HSA-73863	RNA Polymerase I Transcription Termination	1	33	0.00231238	0.911422	0.911422	3	4	0.000294616	9606	Homo sapiens	Taf1d		R-HSA-74993;R-HSA-74992;R-HSA-74994
R-HSA-9734009	Defective Intrinsic Pathway for Apoptosis	1	33	0.00231238	0.911422	0.911422	6	24	0.0017677	9606	Homo sapiens	Foxo3		R-HSA-8870710;R-HSA-8870628;R-HSA-8870703;R-HSA-8870686;R-HSA-8870558;R-HSA-8870698
R-HSA-5655332	Signaling by FGFR3 in disease	1	33	0.00231238	0.911422	0.911422	6	28	0.00206231	9606	Homo sapiens	Pik3r1		R-HSA-8853316;R-HSA-5655285;R-HSA-5655315;R-HSA-8853308;R-HSA-8853323;R-HSA-5655289
R-HSA-8853338	Signaling by FGFR3 point mutants in cancer	1	33	0.00231238	0.911422	0.911422	3	19	0.00139943	9606	Homo sapiens	Pik3r1		R-HSA-5655285;R-HSA-5655315;R-HSA-5655289
R-HSA-9006115	Signaling by NTRK2 (TRKB)	1	33	0.00231238	0.911422	0.911422	2	38	0.00279885	9606	Homo sapiens	Pik3r1		R-HSA-9028505;R-HSA-9028519
R-HSA-6803204	TP53 Regulates Transcription of Genes Involved in Cytochrome C Release	1	33	0.00231238	0.911422	0.911422	1	25	0.00184135	9606	Homo sapiens	Trp53inp1		R-HSA-6799416
R-HSA-373760	L1CAM interactions	6	130	0.00910938	0.914248	0.914248	11	54	0.00397731	9606	Homo sapiens	Itga10;Nrp2;Lama1;Scn8a;Ank3;Nrcam		R-HSA-447030;R-HSA-445076;R-HSA-376134;R-HSA-443778;R-HSA-374675;R-HSA-445088;R-HSA-373730;R-HSA-392751;R-HSA-549060;R-HSA-445067;R-HSA-373739
R-HSA-76005	Response to elevated platelet cytosolic Ca2+	7	148	0.0103707	0.916469	0.916469	4	14	0.00103116	9606	Homo sapiens	Chid1;Tmsb4x;Abcc4;Islr;F13a1;Timp3;F5		R-HSA-429157;R-HSA-481009;R-HSA-351341;R-HSA-481007
R-HSA-9007101	Rab regulation of trafficking	6	131	0.00917945	0.917655	0.917655	7	35	0.00257789	9606	Homo sapiens	Rab31;Dennd4a;Rinl;Rab8b;Rin1;Rab6b		R-HSA-8854182;R-HSA-8876193;R-HSA-8854303;R-HSA-8877311;R-HSA-8876190;R-HSA-8876188;R-HSA-8875320
R-HSA-171319	Telomere Extension By Telomerase	1	34	0.00238245	0.917702	0.917702	8	10	0.00073654	9606	Homo sapiens	Trf		R-HSA-163090;R-HSA-163120;R-HSA-163099;R-HSA-163096;R-HSA-9686521;R-HSA-164617;R-HSA-164620;R-HSA-9686524
R-HSA-5576892	Phase 0 - rapid depolarisation	1	34	0.00238245	0.917702	0.917702	1	2	0.000147308	9606	Homo sapiens	Scn8a		R-HSA-5576895
R-HSA-451326	Activation of kainate receptors upon glutamate binding	1	34	0.00238245	0.917702	0.917702	1	6	0.000441924	9606	Homo sapiens	Gngt2		R-HSA-500717
R-HSA-8850843	Phosphate bond hydrolysis by NTPDase proteins	1	34	0.00238245	0.917702	0.917702	1	12	0.000883848	9606	Homo sapiens	Entpd7		R-HSA-8851494
R-HSA-2559580	Oxidative Stress Induced Senescence	5	114	0.00798823	0.92021	0.92021	12	40	0.00294616	9606	Homo sapiens	Hist1h2ac;Hist1h4i;Map2k6;Kdm6b		R-HSA-3229089;R-HSA-3222593;R-HSA-3223200;R-HSA-3222546;R-HSA-3228469;R-HSA-3222533;R-HSA-3238999;R-HSA-3240295;R-HSA-8979071;R-HSA-450333;R-HSA-450296;R-HSA-3229102
R-HSA-2559583	Cellular Senescence	10	200	0.0140144	0.920306	0.920306	23	90	0.00662886	9606	Homo sapiens	Hist1h2ac;Apc2;Anapc10;Hist1h4i;Trf;Igfbp7;Map2k6;Kdm6b		R-HSA-3790137;R-HSA-3222546;R-HSA-3228469;R-HSA-3238999;R-HSA-3790130;R-HSA-3797202;R-HSA-3788725;R-HSA-3788724;R-HSA-3788745;R-HSA-3229089;R-HSA-3222593;R-HSA-3223200;R-HSA-3222533;R-HSA-3788748;R-HSA-3797196;R-HSA-3785711;R-HSA-3240295;R-HSA-8979071;R-HSA-3788705;R-HSA-450333;R-HSA-3788708;R-HSA-450296;R-HSA-3229102
R-HSA-2122947	NOTCH1 Intracellular Domain Regulates Transcription	2	57	0.00399411	0.921277	0.921277	2	18	0.00132577	9606	Homo sapiens	Tle2;Hdac6		R-HSA-1912388;R-HSA-1912359
R-HSA-5654708	Downstream signaling of activated FGFR3	1	35	0.00245253	0.923537	0.923537	7	23	0.00169404	9606	Homo sapiens	Pik3r1		R-HSA-5654709;R-HSA-5654643;R-HSA-5654640;R-HSA-5654641;R-HSA-5654705;R-HSA-177931;R-HSA-5654637
R-HSA-9006335	Signaling by Erythropoietin	1	35	0.00245253	0.923537	0.923537	4	24	0.0017677	9606	Homo sapiens	Pik3r1		R-HSA-9021627;R-HSA-9027275;R-HSA-9012657;R-HSA-9027280
R-HSA-210745	Regulation of gene expression in beta cells	1	35	0.00245253	0.923537	0.923537	2	12	0.000883848	9606	Homo sapiens	Mafa		R-HSA-211289;R-HSA-211272
R-HSA-180024	DARPP-32 events	1	35	0.00245253	0.923537	0.923537	1	12	0.000883848	9606	Homo sapiens	Pde4d		R-HSA-111962
R-HSA-163125	Post-translational modification: synthesis of GPI-anchored proteins	5	115	0.0080583	0.923621	0.923621	2	16	0.00117846	9606	Homo sapiens	Fcgr3;Lypd3;Xpnpep2;Pigl;Art3		R-HSA-162857;R-HSA-8940388
R-HSA-388841	Costimulation by the CD28 family	4	97	0.006797	0.92479	0.92479	16	35	0.00257789	9606	Homo sapiens	Cd86;Cd80;Pik3r1;Pak3		R-HSA-389381;R-HSA-389348;R-HSA-389158;R-HSA-389350;R-HSA-388833;R-HSA-388832;R-HSA-388814;R-HSA-388809;R-HSA-389352;R-HSA-388808;R-HSA-388811;R-HSA-389354;R-HSA-388829;R-HSA-389788;R-HSA-388831;R-HSA-388830
R-HSA-166016	Toll Like Receptor 4 (TLR4) Cascade	7	151	0.0105809	0.925609	0.925609	25	95	0.00699713	9606	Homo sapiens	Itgb2;Mal;Lbp;S100a9;Map2k6;Ly86		R-HSA-166082;R-HSA-2201316;R-HSA-2559456;R-HSA-166091;R-HSA-2201322;R-HSA-166286;R-HSA-166284;R-HSA-2559414;R-HSA-166038;R-HSA-2262775;R-HSA-166362;R-HSA-166363;R-HSA-450333;R-HSA-2262777;R-HSA-166041;R-HSA-166119;R-HSA-2559439;R-HSA-450346;R-HSA-937059;R-HSA-937022;R-HSA-169719;R-HSA-937079;R-HSA-166072;R-HSA-166015;R-HSA-450296
R-HSA-72187	mRNA 3'-end processing	2	58	0.00406419	0.925827	0.925827	3	3	0.000220962	9606	Homo sapiens	Tifa;Rbp1		R-HSA-8849157;R-HSA-72180;R-HSA-72185
R-HSA-109704	PI3K Cascade	2	58	0.00406419	0.925827	0.925827	3	6	0.000441924	9606	Homo sapiens	Pde3b;Pik3r1		R-HSA-109699;R-HSA-162363;R-HSA-162425
R-HSA-912446	Meiotic recombination	2	58	0.00406419	0.925827	0.925827	4	9	0.000662886	9606	Homo sapiens	Hist1h2ac;Hist1h4i		R-HSA-912458;R-HSA-912503;R-HSA-912496;R-HSA-1214188
R-HSA-2162123	Synthesis of Prostaglandins (PG) and Thromboxanes (TX)	2	58	0.00406419	0.925827	0.925827	3	32	0.00235693	9606	Homo sapiens	Ptgis;Tbxas1		R-HSA-76496;R-HSA-76500;R-HSA-2161613
R-HSA-5619507	Activation of HOX genes during differentiation	5	116	0.00812837	0.926903	0.926903	32	43	0.00316712	9606	Homo sapiens	Hist1h2ac;Hist1h4i;Hoxb4		R-HSA-5617877;R-HSA-5617492;R-HSA-5617431;R-HSA-5621010;R-HSA-5617874;R-HSA-6810159;R-HSA-6810158;R-HSA-5617887;R-HSA-5617881;R-HSA-5617862;R-HSA-6810161;R-HSA-5617859;R-HSA-5617484;R-HSA-5617676;R-HSA-5693644;R-HSA-5617486;R-HSA-5617672;R-HSA-5617483;R-HSA-5617867;R-HSA-5621002;R-HSA-5617866;R-HSA-5617462;R-HSA-5617650;R-HSA-5617661;R-HSA-5617471;R-HSA-5617445;R-HSA-5617452;R-HSA-5617454;R-HSA-6…
R-HSA-5617472	Activation of anterior HOX genes in hindbrain development during early embryogenesis	5	116	0.00812837	0.926903	0.926903	32	43	0.00316712	9606	Homo sapiens	Hist1h2ac;Hist1h4i;Hoxb4		R-HSA-5617877;R-HSA-5617492;R-HSA-5617431;R-HSA-5621010;R-HSA-5617874;R-HSA-6810159;R-HSA-6810158;R-HSA-5617887;R-HSA-5617881;R-HSA-5617862;R-HSA-6810161;R-HSA-5617859;R-HSA-5617484;R-HSA-5617676;R-HSA-5693644;R-HSA-5617486;R-HSA-5617672;R-HSA-5617483;R-HSA-5617867;R-HSA-5621002;R-HSA-5617866;R-HSA-5617462;R-HSA-5617650;R-HSA-5617661;R-HSA-5617471;R-HSA-5617445;R-HSA-5617452;R-HSA-5617454;R-HSA-6…
R-HSA-9013508	NOTCH3 Intracellular Domain Regulates Transcription	1	36	0.0025226	0.928959	0.928959	20	22	0.00162039	9606	Homo sapiens	Notch3		R-HSA-9021480;R-HSA-9021451;R-HSA-9021450;R-HSA-9018538;R-HSA-9021325;R-HSA-9016751;R-HSA-9018542;R-HSA-9013568;R-HSA-9021412;R-HSA-9021478;R-HSA-9016861;R-HSA-9014141;R-HSA-9013567;R-HSA-9013631;R-HSA-9021406;R-HSA-9014129;R-HSA-9013488;R-HSA-9016916;R-HSA-9013652;R-HSA-9017398
R-HSA-5626467	RHO GTPases activate IQGAPs	1	36	0.0025226	0.928959	0.928959	4	5	0.00036827	9606	Homo sapiens	Iqgap2		R-HSA-5626549;R-HSA-5626469;R-HSA-5672304;R-HSA-5626507
R-HSA-5693568	Resolution of D-loop Structures through Holliday Junction Intermediates	1	36	0.0025226	0.928959	0.928959	6	9	0.000662886	9606	Homo sapiens	Rad51b		R-HSA-5686469;R-HSA-5686483;R-HSA-5693539;R-HSA-5693584;R-HSA-5686410;R-HSA-5686440
R-HSA-456926	Thrombin signalling through proteinase activated receptors (PARs)	1	36	0.0025226	0.928959	0.928959	6	15	0.00110481	9606	Homo sapiens	Gngt2		R-HSA-396996;R-HSA-397891;R-HSA-114552;R-HSA-396941;R-HSA-397835;R-HSA-114558
R-HSA-5654716	Downstream signaling of activated FGFR4	1	36	0.0025226	0.928959	0.928959	7	23	0.00169404	9606	Homo sapiens	Pik3r1		R-HSA-5654662;R-HSA-5654659;R-HSA-177931;R-HSA-5654669;R-HSA-5654717;R-HSA-5654714;R-HSA-5654667
R-HSA-549127	Organic cation transport	1	36	0.0025226	0.928959	0.928959	1	9	0.000662886	9606	Homo sapiens	Slc22a15		R-HSA-549297
R-HSA-162710	Synthesis of glycosylphosphatidylinositol (GPI)	1	36	0.0025226	0.928959	0.928959	1	11	0.000810194	9606	Homo sapiens	Pigl		R-HSA-162857
R-HSA-193807	Synthesis of bile acids and bile salts via 27-hydroxycholesterol	1	36	0.0025226	0.928959	0.928959	1	12	0.000883848	9606	Homo sapiens	Ptgis		R-HSA-193845
R-HSA-5223345	Miscellaneous transport and binding events	1	36	0.0025226	0.928959	0.928959	1	13	0.000957502	9606	Homo sapiens	Lrrc8e		R-HSA-8941543
R-HSA-3371571	HSF1-dependent transactivation	2	59	0.00413426	0.930128	0.930128	4	8	0.000589232	9606	Homo sapiens	Hsph1;Cryba4		R-HSA-3371554;R-HSA-5082356;R-HSA-5082369;R-HSA-5082384
R-HSA-202433	Generation of second messenger molecules	2	59	0.00413426	0.930128	0.930128	2	17	0.00125212	9606	Homo sapiens	Pak3;Cd101		R-HSA-430183;R-HSA-202248
R-HSA-5619084	ABC transporter disorders	4	99	0.00693715	0.931626	0.931626	5	22	0.00162039	9606	Homo sapiens	Abcd2;Abcb6;Derl3;Derl1		R-HSA-8866854;R-HSA-5683355;R-HSA-5684043;R-HSA-8866857;R-HSA-8866856
R-HSA-5250913	Positive epigenetic regulation of rRNA expression	3	80	0.00560577	0.932464	0.932464	5	7	0.000515578	9606	Homo sapiens	Hist1h2ac;Taf1d;Hist1h4i		R-HSA-427383;R-HSA-5250930;R-HSA-5250947;R-HSA-5250938;R-HSA-427336
R-HSA-427413	NoRC negatively regulates rRNA expression	3	80	0.00560577	0.932464	0.932464	4	7	0.000515578	9606	Homo sapiens	Hist1h2ac;Taf1d;Hist1h4i		R-HSA-427366;R-HSA-5227490;R-HSA-433672;R-HSA-427337
R-HSA-198725	Nuclear Events (kinase and transcription factor activation)	3	80	0.00560577	0.932464	0.932464	3	48	0.00353539	9606	Homo sapiens	Sh3gl3;Id4		R-HSA-9612534;R-HSA-9613476;R-HSA-9619838
R-HSA-8878159	Transcriptional regulation by RUNX3	5	118	0.00826852	0.933091	0.933091	6	47	0.00346174	9606	Homo sapiens	Ctgf;Itga4;Foxo3		R-HSA-8952232;R-HSA-8949343;R-HSA-8951695;R-HSA-1989766;R-HSA-8952226;R-HSA-8949335
R-HSA-8980692	RHOA GTPase cycle	7	154	0.0107911	0.933866	0.933866	3	6	0.000441924	9606	Homo sapiens	Rtkn;Tfrc;Ophn1;Pik3r1;Dock2;Arhgap30;Ngef		R-HSA-9013009;R-HSA-8980691;R-HSA-8981637
R-HSA-5693537	Resolution of D-Loop Structures	1	37	0.00259267	0.933997	0.933997	7	10	0.00073654	9606	Homo sapiens	Rad51b		R-HSA-5693589;R-HSA-5686469;R-HSA-5686483;R-HSA-5693539;R-HSA-5693584;R-HSA-5686410;R-HSA-5686440
R-HSA-936440	Negative regulators of DDX58/IFIH1 signaling	1	37	0.00259267	0.933997	0.933997	2	13	0.000957502	9606	Homo sapiens	Pcbp3		R-HSA-990526;R-HSA-990528
R-HSA-186763	Downstream signal transduction	1	37	0.00259267	0.933997	0.933997	2	16	0.00117846	9606	Homo sapiens	Pik3r1		R-HSA-186800;R-HSA-186780
R-HSA-9675135	Diseases of DNA repair	1	37	0.00259267	0.933997	0.933997	3	30	0.00220962	9606	Homo sapiens	Rad51b		R-HSA-9701199;R-HSA-9704408;R-HSA-9704330
R-HSA-196849	Metabolism of water-soluble vitamins and cofactors	13	256	0.0179385	0.93526	0.93526	21	144	0.0106062	9606	Homo sapiens	Mthfd1l;Slc5a6;Mmab;Gda;Enpp2;Mocs3;Ptgis;Tcn2;Ccdc57;Acp5;Mal;Cd38;Pnpo		R-HSA-3000109;R-HSA-199202;R-HSA-8938314;R-HSA-947499;R-HSA-199206;R-HSA-3159253;R-HSA-3000074;R-HSA-3000263;R-HSA-199219;R-HSA-5696839;R-HSA-76496;R-HSA-199216;R-HSA-8938076;R-HSA-947514;R-HSA-965019;R-HSA-196950;R-HSA-6801456;R-HSA-3000122;R-HSA-965079;R-HSA-947538;R-HSA-3000112
R-HSA-204998	Cell death signalling via NRAGE, NRIF and NADE	3	81	0.00567585	0.93594	0.93594	11	17	0.00125212	9606	Homo sapiens	Ngfr;Arhgef16;Ngef		R-HSA-193650;R-HSA-204949;R-HSA-204981;R-HSA-193669;R-HSA-205115;R-HSA-205112;R-HSA-205039;R-HSA-204958;R-HSA-205117;R-HSA-193677;R-HSA-205132
R-HSA-4086398	Ca2+ pathway	3	81	0.00567585	0.93594	0.93594	9	27	0.00198866	9606	Homo sapiens	Gngt2;Pde6g;Itpr3		R-HSA-169680;R-HSA-4086392;R-HSA-398193;R-HSA-4420052;R-HSA-4086393;R-HSA-3965444;R-HSA-3965447;R-HSA-3965441;R-HSA-398040
R-HSA-202733	Cell surface interactions at the vascular wall	13	257	0.0180085	0.937269	0.937269	25	65	0.00478751	9606	Homo sapiens	Cd84;Atp1b2;Gypc;Itga6;Sirpa;Dok2;F9;Itga4;Itgb2;Olr1;Angpt1;Pik3r1;Mertk		R-HSA-210881;R-HSA-204871;R-HSA-204873;R-HSA-202703;R-HSA-204813;R-HSA-204434;R-HSA-202706;R-HSA-202704;R-HSA-202710;R-HSA-375133;R-HSA-202713;R-HSA-202718;R-HSA-8867098;R-HSA-210974;R-HSA-210977;R-HSA-202727;R-HSA-204773;R-HSA-204779;R-HSA-9679740;R-HSA-204850;R-HSA-141040;R-HSA-203130;R-HSA-210872;R-HSA-204798;R-HSA-204861
R-HSA-8939211	ESR-mediated signaling	13	257	0.0180085	0.937269	0.937269	28	111	0.00817559	9606	Homo sapiens	Hist1h2ac;Btc;Gngt2;Ctsd;Epgn;Hist1h4i;Bcl2;Pik3r1;Foxo3;Kdm4b		R-HSA-9011981;R-HSA-9011983;R-HSA-9011975;R-HSA-9632412;R-HSA-9009371;R-HSA-9021596;R-HSA-9021660;R-HSA-9625482;R-HSA-9011985;R-HSA-9011984;R-HSA-9624526;R-HSA-9625487;R-HSA-9624527;R-HSA-9009065;R-HSA-9011949;R-HSA-9011950;R-HSA-9021601;R-HSA-9021600;R-HSA-9012000;R-HSA-9023840;R-HSA-9625465;R-HSA-9009378;R-HSA-9011941;R-HSA-9023845;R-HSA-9623999;R-HSA-9023846;R-HSA-9011966;R-HSA-9011952
R-HSA-2173796	SMAD2/SMAD3:SMAD4 heterotrimer regulates transcription	1	38	0.00266274	0.938678	0.938678	16	19	0.00139943	9606	Homo sapiens	Smad2		R-HSA-2031355;R-HSA-2187303;R-HSA-9736979;R-HSA-9736959;R-HSA-9736984;R-HSA-2187309;R-HSA-173488;R-HSA-2186643;R-HSA-2106579;R-HSA-9736992;R-HSA-1484099;R-HSA-2127257;R-HSA-2176475;R-HSA-2106586;R-HSA-2187293;R-HSA-170847
R-HSA-390247	Beta-oxidation of very long chain fatty acids	1	38	0.00266274	0.938678	0.938678	1	12	0.000883848	9606	Homo sapiens	Abcd2		R-HSA-390393
R-HSA-4791275	Signaling by WNT in cancer	1	38	0.00266274	0.938678	0.938678	1	16	0.00117846	9606	Homo sapiens	Dkk2		R-HSA-5339711
R-HSA-5607764	CLEC7A (Dectin-1) signaling	5	120	0.00840866	0.938807	0.938807	7	45	0.00331443	9606	Homo sapiens	Pycard;Syk;Ccl17;Itpr3		R-HSA-5660662;R-HSA-5660663;R-HSA-169683;R-HSA-169680;R-HSA-5660965;R-HSA-5607745;R-HSA-5607738
R-HSA-977606	Regulation of Complement cascade	6	139	0.00974003	0.940904	0.940904	26	42	0.00309347	9606	Homo sapiens	C4b;Cfh;C5ar2;C5ar1;Cfp		R-HSA-977359;R-HSA-977615;R-HSA-964811;R-HSA-977605;R-HSA-981637;R-HSA-977602;R-HSA-976768;R-HSA-977375;R-HSA-981535;R-HSA-977629;R-HSA-977626;R-HSA-981658;R-HSA-977371;R-HSA-1006169;R-HSA-977363;R-HSA-977619;R-HSA-981648;R-HSA-976810;R-HSA-375395;R-HSA-976743;R-HSA-8851436;R-HSA-2855047;R-HSA-981728;R-HSA-8951486;R-HSA-981621;R-HSA-981680
R-HSA-72649	Translation initiation complex formation	2	62	0.00434447	0.941659	0.941659	2	2	0.000147308	9606	Homo sapiens	Rps16;Eif4a2		R-HSA-156808;R-HSA-157849
R-HSA-8939902	Regulation of RUNX2 expression and activity	3	83	0.00581599	0.942401	0.942401	32	32	0.00235693	9606	Homo sapiens	Runx2		R-HSA-8985293;R-HSA-9008076;R-HSA-9008015;R-HSA-9007759;R-HSA-9016526;R-HSA-8939904;R-HSA-8940032;R-HSA-9007686;R-HSA-9008345;R-HSA-8939801;R-HSA-8939929;R-HSA-9008475;R-HSA-9007707;R-HSA-9009309;R-HSA-9009308;R-HSA-9008476;R-HSA-9008479;R-HSA-9008478;R-HSA-9009362;R-HSA-8939688;R-HSA-9009451;R-HSA-9009452;R-HSA-9008110;R-HSA-9008480;R-HSA-8939938;R-HSA-9008036;R-HSA-9009401;R-HSA-9009403;R-HSA-8…
R-HSA-5633008	TP53 Regulates Transcription of Cell Death Genes	3	83	0.00581599	0.942401	0.942401	3	68	0.00500847	9606	Homo sapiens	Trp53inp1;Perp		R-HSA-6800836;R-HSA-6800816;R-HSA-6799416
R-HSA-1839124	FGFR1 mutant receptor activation	1	39	0.00273281	0.943027	0.943027	6	25	0.00184135	9606	Homo sapiens	Pik3r1		R-HSA-1839102;R-HSA-1839080;R-HSA-1839114;R-HSA-1839078;R-HSA-1839107;R-HSA-1839091
R-HSA-8939243	RUNX1 interacts with co-factors whose precise effect on RUNX1 targets is not known	1	39	0.00273281	0.943027	0.943027	1	5	0.00036827	9606	Homo sapiens	Smarca2		R-HSA-8938217
R-HSA-354192	Integrin signaling	1	39	0.00273281	0.943027	0.943027	2	24	0.0017677	9606	Homo sapiens	Syk		R-HSA-429415;R-HSA-429441
R-HSA-6804758	Regulation of TP53 Activity through Acetylation	1	39	0.00273281	0.943027	0.943027	1	14	0.00103116	9606	Homo sapiens	Map2k6		R-HSA-8877691
R-HSA-70326	Glucose metabolism	6	140	0.0098101	0.943356	0.943356	5	50	0.0036827	9606	Homo sapiens	Pkm;Slc37a2;Slc37a1;Gnpda2;Aldoc		R-HSA-6799604;R-HSA-3257122;R-HSA-71495;R-HSA-71670;R-HSA-71496
R-HSA-5617833	Cilium Assembly	10	210	0.0147152	0.943594	0.943594	31	50	0.0036827	9606	Homo sapiens	Ttc26;Arl6;Nphp4;Tctn1;Kif24;Nphp1;Cngb1;Bbs9;Ninl;Hdac6		R-HSA-5617815;R-HSA-5625424;R-HSA-5625426;R-HSA-5617820;R-HSA-5623519;R-HSA-5623513;R-HSA-5617816;R-HSA-5618331;R-HSA-5624129;R-HSA-5625421;R-HSA-5625416;R-HSA-5626699;R-HSA-5624949;R-HSA-5626228;R-HSA-5620918;R-HSA-5626227;R-HSA-5620914;R-HSA-5624125;R-HSA-5624127;R-HSA-5624126;R-HSA-5620921;R-HSA-5626681;R-HSA-5624952;R-HSA-5638009;R-HSA-5623525;R-HSA-5623524;R-HSA-5623527;R-HSA-5623521;R-HSA-5…
R-HSA-983695	Antigen activates B Cell Receptor (BCR) leading to generation of second messengers	4	103	0.00721743	0.943639	0.943639	17	25	0.00184135	9606	Homo sapiens	Syk;Trpc1;Pik3r1;Itpr3		R-HSA-9606162;R-HSA-9606163;R-HSA-9606160;R-HSA-2076220;R-HSA-2089943;R-HSA-2045911;R-HSA-1168376;R-HSA-1112666;R-HSA-169683;R-HSA-169680;R-HSA-983707;R-HSA-9606151;R-HSA-9606887;R-HSA-2089927;R-HSA-983703;R-HSA-983700;R-HSA-9606159
R-HSA-418597	G alpha (z) signalling events	2	63	0.00441455	0.945083	0.945083	6	13	0.000957502	9606	Homo sapiens	Gngt2;Adcy2		R-HSA-392129;R-HSA-392064;R-HSA-749453;R-HSA-750988;R-HSA-751024;R-HSA-749446
R-HSA-1980143	Signaling by NOTCH1	3	84	0.00588606	0.945399	0.945399	11	39	0.0028725	9606	Homo sapiens	Tle2;Dtx4;Hdac6		R-HSA-1980125;R-HSA-1980109;R-HSA-1912398;R-HSA-1980122;R-HSA-1980123;R-HSA-1980118;R-HSA-1912357;R-HSA-1912388;R-HSA-1912359;R-HSA-1980112;R-HSA-373706
R-HSA-390522	Striated Muscle Contraction	1	40	0.00280289	0.947068	0.947068	4	4	0.000294616	9606	Homo sapiens	Tpm2		R-HSA-390597;R-HSA-390598;R-HSA-390593;R-HSA-390595
R-HSA-390471	Association of TriC/CCT with target proteins during biosynthesis	1	40	0.00280289	0.947068	0.947068	1	2	0.000147308	9606	Homo sapiens	Tst		R-HSA-390470
R-HSA-5696394	DNA Damage Recognition in GG-NER	1	40	0.00280289	0.947068	0.947068	2	5	0.00036827	9606	Homo sapiens	Parp2		R-HSA-5696655;R-HSA-5696664
R-HSA-163359	Glucagon signaling in metabolic regulation	1	40	0.00280289	0.947068	0.947068	2	6	0.000441924	9606	Homo sapiens	Adcy2		R-HSA-163617;R-HSA-164377
R-HSA-1482788	Acyl chain remodelling of PC	1	40	0.00280289	0.947068	0.947068	2	9	0.000662886	9606	Homo sapiens	Mboat2		R-HSA-1482533;R-HSA-1482547
R-HSA-168638	NOD1/2 Signaling Pathway	1	40	0.00280289	0.947068	0.947068	2	18	0.00132577	9606	Homo sapiens	Map2k6		R-HSA-727819;R-HSA-1247960
R-HSA-72702	Ribosomal scanning and start codon recognition	2	64	0.00448462	0.948315	0.948315	2	2	0.000147308	9606	Homo sapiens	Rps16;Eif4a2		R-HSA-72697;R-HSA-72621
R-HSA-174084	Autodegradation of Cdh1 by Cdh1:APC/C	2	64	0.00448462	0.948315	0.948315	2	2	0.000147308	9606	Homo sapiens	Apc2;Anapc10		R-HSA-174058;R-HSA-174057
R-HSA-400253	Circadian Clock	4	105	0.00735758	0.948893	0.948893	14	59	0.00434558	9606	Homo sapiens	Rbm4;Cpt1a;Ubxn6		R-HSA-5663252;R-HSA-1368119;R-HSA-1801587;R-HSA-549475;R-HSA-5663258;R-HSA-400342;R-HSA-1368069;R-HSA-5663271;R-HSA-1368065;R-HSA-549533;R-HSA-5663264;R-HSA-5663265;R-HSA-1368140;R-HSA-5663245
R-HSA-9664433	Leishmania parasite growth and survival	15	297	0.0208114	0.949695	0.949695	17	40	0.00294616	9606	Homo sapiens	Adora2a;Gngt2;Fcgr3;Syk;Vipr2;Gpr25;Ptgir;Vipr1;Ptger2;44808;Adcy2;Ggt1;Itpr3;Pthlh		R-HSA-9664275;R-HSA-9660819;R-HSA-9664306;R-HSA-9664273;R-HSA-163617;R-HSA-392129;R-HSA-9664278;R-HSA-9660824;R-HSA-9660828;R-HSA-169683;R-HSA-169680;R-HSA-9664261;R-HSA-266046;R-HSA-111930;R-HSA-9664271;R-HSA-9664270;R-HSA-9664268
R-HSA-9662851	Anti-inflammatory response favouring Leishmania parasite infection	15	297	0.0208114	0.949695	0.949695	17	40	0.00294616	9606	Homo sapiens	Adora2a;Gngt2;Fcgr3;Syk;Vipr2;Gpr25;Ptgir;Vipr1;Ptger2;44808;Adcy2;Ggt1;Itpr3;Pthlh		R-HSA-9664275;R-HSA-9660819;R-HSA-9664306;R-HSA-9664273;R-HSA-163617;R-HSA-392129;R-HSA-9664278;R-HSA-9660824;R-HSA-9660828;R-HSA-169683;R-HSA-169680;R-HSA-9664261;R-HSA-266046;R-HSA-111930;R-HSA-9664271;R-HSA-9664270;R-HSA-9664268
R-HSA-5696400	Dual Incision in GG-NER	1	41	0.00287296	0.950822	0.950822	3	3	0.000220962	9606	Homo sapiens	Parp2		R-HSA-5690213;R-HSA-5690990;R-HSA-5690988
R-HSA-392518	Signal amplification	1	41	0.00287296	0.950822	0.950822	12	19	0.00139943	9606	Homo sapiens	Gngt2		R-HSA-428918;R-HSA-428917;R-HSA-418581;R-HSA-418579;R-HSA-392195;R-HSA-428752;R-HSA-418576;R-HSA-428750;R-HSA-428909;R-HSA-428749;R-HSA-392187;R-HSA-392202
R-HSA-5693616	Presynaptic phase of homologous DNA pairing and strand exchange	1	41	0.00287296	0.950822	0.950822	2	5	0.00036827	9606	Homo sapiens	Rad51b		R-HSA-5685318;R-HSA-5685341
R-HSA-6814122	Cooperation of PDCL (PhLP1) and TRiC/CCT in G-protein beta folding	1	41	0.00287296	0.950822	0.950822	2	11	0.000810194	9606	Homo sapiens	Gngt2		R-HSA-6814418;R-HSA-8850560
R-HSA-416482	G alpha (12/13) signalling events	3	86	0.00602621	0.950966	0.950966	5	15	0.00110481	9606	Homo sapiens	Gngt2;Arhgef16;Ngef		R-HSA-751019;R-HSA-751039;R-HSA-419166;R-HSA-751027;R-HSA-751029
R-HSA-112399	IRS-mediated signalling	2	65	0.00455469	0.951366	0.951366	4	9	0.000662886	9606	Homo sapiens	Pde3b;Pik3r1		R-HSA-74737;R-HSA-109699;R-HSA-162363;R-HSA-162425
R-HSA-8956319	Nucleotide catabolism	6	144	0.0100904	0.952275	0.952275	7	63	0.0046402	9606	Homo sapiens	Tymp;Pnp;Gda;Entpd7;Nt5m		R-HSA-8851494;R-HSA-74242;R-HSA-112265;R-HSA-74249;R-HSA-74376;R-HSA-109514;R-HSA-74255
R-HSA-9012999	RHO GTPase cycle	25	460	0.0322332	0.952588	0.952588	45	91	0.00670251	9606	Homo sapiens	Spata13;Kctd3;Ncf1;Ophn1;Ncf4;Dock2;Cpne8;Arhgef16;Rac2;Pak3;Iqgap2;Ptpn13;Arhgap30;Pak4;Ngef;Dsp;Rtkn;Ccdc88b;Tfrc;Fam83b;Vrk2;Plxna1;Sh3bp1;Farp2;Pik3r1		R-HSA-9018766;R-HSA-9014467;R-HSA-8981637;R-HSA-9693214;R-HSA-9018758;R-HSA-9013145;R-HSA-9014296;R-HSA-9014424;R-HSA-9013144;R-HSA-9714691;R-HSA-9013022;R-HSA-9013009;R-HSA-9696266;R-HSA-9017488;R-HSA-8980691;R-HSA-9014293;R-HSA-9696271;R-HSA-9014420;R-HSA-9693198;R-HSA-9013143;R-HSA-9014295;R-HSA-9014294;R-HSA-9696268;R-HSA-9013161;R-HSA-9018794;R-HSA-9714480;R-HSA-9714481;R-HSA-9714483;R-HSA-9…
R-HSA-195721	Signaling by WNT	17	332	0.023264	0.952982	0.952982	39	157	0.0115637	9606	Homo sapiens	Hist1h2ac;Sfrp2;Gngt2;Tle2;Dkk2;Wnt2b;Hist1h4i;Pde6g;Wnt5b;Rac2;Sox9;Wnt7a;Wnt2;Itpr3;Wnt4;Wnt10b		R-HSA-3769401;R-HSA-3858491;R-HSA-4649028;R-HSA-3299569;R-HSA-4086392;R-HSA-4086393;R-HSA-3858482;R-HSA-3364026;R-HSA-4641231;R-HSA-3858480;R-HSA-4641229;R-HSA-3781941;R-HSA-3322431;R-HSA-3781943;R-HSA-3322429;R-HSA-3247840;R-HSA-3858475;R-HSA-3247843;R-HSA-3238691;R-HSA-169680;R-HSA-3247844;R-HSA-8944349;R-HSA-3238694;R-HSA-4420052;R-HSA-5368586;R-HSA-398040;R-HSA-3772441;R-HSA-3769370;R-HSA-336…
R-HSA-73854	RNA Polymerase I Promoter Clearance	3	87	0.00609628	0.953547	0.953547	7	10	0.00073654	9606	Homo sapiens	Hist1h2ac;Taf1d;Hist1h4i		R-HSA-73729;R-HSA-73718;R-HSA-73769;R-HSA-73736;R-HSA-73739;R-HSA-74986;R-HSA-73758
R-HSA-190236	Signaling by FGFR	4	107	0.00749772	0.953694	0.953694	30	142	0.0104589	9606	Homo sapiens	Fgfbp1;Esrp2;Esrp1;Pik3r1		R-HSA-5654614;R-HSA-5654612;R-HSA-5654622;R-HSA-177931;R-HSA-5654620;R-HSA-5656070;R-HSA-5654662;R-HSA-5654596;R-HSA-5654594;R-HSA-5654659;R-HSA-5654592;R-HSA-6803838;R-HSA-6803836;R-HSA-5654669;R-HSA-5654667;R-HSA-6803527;R-HSA-5654709;R-HSA-5654643;R-HSA-5654640;R-HSA-5654641;R-HSA-5654705;R-HSA-5654591;R-HSA-5654717;R-HSA-5654714;R-HSA-5654692;R-HSA-5654690;R-HSA-190260;R-HSA-5654637;R-HSA-565…
R-HSA-72662	Activation of the mRNA upon binding of the cap-binding complex and eIFs, and subsequent binding to 43S	2	66	0.00462476	0.954243	0.954243	5	6	0.000441924	9606	Homo sapiens	Rps16;Eif4a2		R-HSA-72647;R-HSA-72631;R-HSA-72635;R-HSA-156808;R-HSA-157849
R-HSA-5678895	Defective CFTR causes cystic fibrosis	2	66	0.00462476	0.954243	0.954243	3	7	0.000515578	9606	Homo sapiens	Derl3;Derl1		R-HSA-8866854;R-HSA-8866857;R-HSA-8866856
R-HSA-5607761	Dectin-1 mediated noncanonical NF-kB signaling	2	66	0.00462476	0.954243	0.954243	1	9	0.000662886	9606	Homo sapiens	Ccl17		R-HSA-5660965
R-HSA-5654696	Downstream signaling of activated FGFR2	1	42	0.00294303	0.954311	0.954311	7	23	0.00169404	9606	Homo sapiens	Pik3r1		R-HSA-5654614;R-HSA-5654612;R-HSA-5654622;R-HSA-177931;R-HSA-5654620;R-HSA-5654701;R-HSA-5654697
R-HSA-5654687	Downstream signaling of activated FGFR1	1	42	0.00294303	0.954311	0.954311	7	24	0.0017677	9606	Homo sapiens	Pik3r1		R-HSA-5654692;R-HSA-5654596;R-HSA-5654594;R-HSA-5654690;R-HSA-5654592;R-HSA-5654591;R-HSA-177931
R-HSA-202430	Translocation of ZAP-70 to Immunological synapse	1	42	0.00294303	0.954311	0.954311	1	4	0.000294616	9606	Homo sapiens	Ptpn22		R-HSA-8855381
R-HSA-8964539	Glutamate and glutamine metabolism	1	42	0.00294303	0.954311	0.954311	1	14	0.00103116	9606	Homo sapiens	Glul		R-HSA-70606
R-HSA-2995410	Nuclear Envelope (NE) Reassembly	3	88	0.00616635	0.956	0.956	7	24	0.0017677	9606	Homo sapiens	Chmp4c;Vrk2		R-HSA-2995389;R-HSA-9668419;R-HSA-9668389;R-HSA-9668405;R-HSA-9668395;R-HSA-9668415;R-HSA-9668398
R-HSA-5693565	Recruitment and ATM-mediated phosphorylation of repair and signaling proteins at DNA double strand breaks	2	67	0.00469484	0.956958	0.956958	29	39	0.0028725	9606	Homo sapiens	Hist1h4i;Kdm4b		R-HSA-5683735;R-HSA-5682967;R-HSA-69891;R-HSA-5682965;R-HSA-5683986;R-HSA-5682588;R-HSA-5682586;R-HSA-5683930;R-HSA-5683801;R-HSA-5682629;R-HSA-5683077;R-HSA-5693583;R-HSA-5683405;R-HSA-5682992;R-HSA-5693566;R-HSA-5683967;R-HSA-5683964;R-HSA-5683384;R-HSA-5683385;R-HSA-5682598;R-HSA-5682983;R-HSA-5693602;R-HSA-5693536;R-HSA-5683425;R-HSA-5682607;R-HSA-5682863;R-HSA-5693551;R-HSA-5693549;R-HSA-568…
R-HSA-9033241	Peroxisomal protein import	2	67	0.00469484	0.956958	0.956958	3	26	0.001915	9606	Homo sapiens	Nudt19;Acot1		R-HSA-9033233;R-HSA-9033235;R-HSA-9033236
R-HSA-372790	Signaling by GPCR	51	865	0.0606124	0.95706	0.95706	101	355	0.0261472	9606	Homo sapiens	Adora2a;Adgre5;Opn1sw;Cxcr1;C5ar2;Cxcr2;C5ar1;Aplnr;Fpr2;Ccl17;Ccr10;Vipr2;Gpr25;Vipr1;Rgs2;Arhgef16;Pnp;Ptger2;P2ry2;Pde4d;Wnt7a;Adcy2;Cxcl1;Ccr5;Wnt2;Dgke;Pthlh;Wnt4;Ngef;Cxcl5;Wnt10b;Ccr1;Gngt2;Pmch;Ackr4;Cort;Wnt2b;Ptgir;44808;Pde3b;Gpr35;Pde1a;F2rl1;Pik3r6;Pik3r1;Itpr3		R-HSA-167427;R-HSA-391940;R-HSA-391942;R-HSA-426240;R-HSA-419841;R-HSA-167429;R-HSA-392206;R-HSA-167433;R-HSA-418582;R-HSA-420883;R-HSA-8964241;R-HSA-373791;R-HSA-374298;R-HSA-163617;R-HSA-8964271;R-HSA-373813;R-HSA-879674;R-HSA-111930;R-HSA-373061;R-HSA-374337;R-HSA-139854;R-HSA-443978;R-HSA-111955;R-HSA-389463;R-HSA-373073;R-HSA-443986;R-HSA-111956;R-HSA-8964317;R-HSA-419166;R-HSA-373086;R-HSA-…
R-HSA-9682385	FLT3 signaling in disease	1	43	0.0030131	0.957552	0.957552	4	52	0.00383001	9606	Homo sapiens	Pik3r1		R-HSA-9698179;R-HSA-9703439;R-HSA-9698174;R-HSA-9703434
R-HSA-8982491	Glycogen metabolism	1	43	0.0030131	0.957552	0.957552	3	39	0.0028725	9606	Homo sapiens	Pygl		R-HSA-71588;R-HSA-71590;R-HSA-453339
R-HSA-201556	Signaling by ALK	1	43	0.0030131	0.957552	0.957552	2	40	0.00294616	9606	Homo sapiens	Pik3r1		R-HSA-201510;R-HSA-201515
R-HSA-8878166	Transcriptional regulation by RUNX2	6	147	0.0103006	0.958112	0.958112	81	84	0.00618693	9606	Homo sapiens	Sox9;Hdac6;Twist2;Runx2		R-HSA-9008137;R-HSA-8937864;R-HSA-8985227;R-HSA-8985485;R-HSA-8937869;R-HSA-9008015;R-HSA-8938382;R-HSA-9007759;R-HSA-8939904;R-HSA-8940032;R-HSA-9009282;R-HSA-8938371;R-HSA-9008389;R-HSA-8939801;R-HSA-8939929;R-HSA-8985627;R-HSA-9009309;R-HSA-9009308;R-HSA-9008412;R-HSA-8865425;R-HSA-8939667;R-HSA-8939670;R-HSA-8939688;R-HSA-9009451;R-HSA-8985644;R-HSA-9009452;R-HSA-8939938;R-HSA-8984994;R-HSA-9…
R-HSA-73864	RNA Polymerase I Transcription	3	89	0.00623642	0.958332	0.958332	10	14	0.00103116	9606	Homo sapiens	Hist1h2ac;Taf1d;Hist1h4i		R-HSA-73729;R-HSA-74993;R-HSA-74992;R-HSA-74994;R-HSA-73718;R-HSA-73769;R-HSA-73736;R-HSA-73739;R-HSA-74986;R-HSA-73758
R-HSA-5250941	Negative epigenetic regulation of rRNA expression	3	89	0.00623642	0.958332	0.958332	8	12	0.000883848	9606	Homo sapiens	Hist1h2ac;Taf1d;Hist1h4i		R-HSA-427366;R-HSA-427527;R-HSA-5211239;R-HSA-427514;R-HSA-5227490;R-HSA-433672;R-HSA-427528;R-HSA-427337
R-HSA-6796648	TP53 Regulates Transcription of DNA Repair Genes	3	89	0.00623642	0.958332	0.958332	3	17	0.00125212	9606	Homo sapiens	Fancd2		R-HSA-6797606;R-HSA-6797712;R-HSA-6797616
R-HSA-174154	APC/C:Cdc20 mediated degradation of Securin	2	68	0.00476491	0.959518	0.959518	3	3	0.000220962	9606	Homo sapiens	Apc2;Anapc10		R-HSA-174144;R-HSA-174202;R-HSA-174121
R-HSA-8856688	Golgi-to-ER retrograde transport	6	148	0.0103707	0.959908	0.959908	5	18	0.00132577	9606	Homo sapiens	Klc3;Kif1a;Galnt2;Acp1;Rab6b		R-HSA-8849350;R-HSA-8849348;R-HSA-6811426;R-HSA-6811423;R-HSA-8849353
R-HSA-3781865	Diseases of glycosylation	9	202	0.0141546	0.959919	0.959919	14	77	0.00567136	9606	Homo sapiens	Hexa;Adamts10;Sbspon;Neu1;Dag1;Notch3;Thsd7a;Cfp;Fmod		R-HSA-9035976;R-HSA-5615604;R-HSA-9035978;R-HSA-9035949;R-HSA-4341669;R-HSA-9035950;R-HSA-5615556;R-HSA-3656230;R-HSA-3656259;R-HSA-3656258;R-HSA-5096538;R-HSA-6785565;R-HSA-3656269;R-HSA-5617096
R-HSA-70171	Glycolysis	4	110	0.00770794	0.960121	0.960121	3	24	0.0017677	9606	Homo sapiens	Pkm;Gnpda2;Aldoc		R-HSA-6799604;R-HSA-71670;R-HSA-71496
R-HSA-9645723	Diseases of programmed cell death	3	90	0.0063065	0.960547	0.960547	7	28	0.00206231	9606	Homo sapiens	Hist1h2ac;Hist1h4i;Foxo3		R-HSA-8870710;R-HSA-8870628;R-HSA-8870703;R-HSA-8870686;R-HSA-8870558;R-HSA-8870698;R-HSA-9710490
R-HSA-5693579	Homologous DNA Pairing and Strand Exchange	1	44	0.00308318	0.960564	0.960564	4	8	0.000589232	9606	Homo sapiens	Rad51b		R-HSA-5685318;R-HSA-5693620;R-HSA-5685838;R-HSA-5685341
R-HSA-5218920	VEGFR2 mediated vascular permeability	1	44	0.00308318	0.960564	0.960564	4	15	0.00110481	9606	Homo sapiens	Pak3		R-HSA-5357472;R-HSA-5357477;R-HSA-5357445;R-HSA-5357483
R-HSA-2024096	HS-GAG degradation	1	44	0.00308318	0.960564	0.960564	1	14	0.00103116	9606	Homo sapiens	Hpse		R-HSA-1667005
R-HSA-5689896	Ovarian tumor domain proteases	1	44	0.00308318	0.960564	0.960564	1	14	0.00103116	9606	Homo sapiens	Tnip3		R-HSA-5690845
R-HSA-5609975	Diseases associated with glycosylation precursor biosynthesis	1	44	0.00308318	0.960564	0.960564	1	16	0.00117846	9606	Homo sapiens	Neu1		R-HSA-4341669
R-HSA-3899300	SUMOylation of transcription cofactors	1	44	0.00308318	0.960564	0.960564	1	27	0.00198866	9606	Homo sapiens	Mal		R-HSA-3900070
R-HSA-2428928	IRS-related events triggered by IGF1R	2	69	0.00483498	0.961932	0.961932	4	12	0.000883848	9606	Homo sapiens	Pde3b;Pik3r1		R-HSA-74737;R-HSA-109699;R-HSA-162363;R-HSA-162425
R-HSA-352230	Amino acid transport across the plasma membrane	2	69	0.00483498	0.961932	0.961932	2	36	0.00265154	9606	Homo sapiens	Nat2;Slc7a1		R-HSA-352119;R-HSA-375776
R-HSA-211897	Cytochrome P450 - arranged by substrate type	8	186	0.0130334	0.962546	0.962546	28	61	0.00449289	9606	Homo sapiens	Ptgis;Cyp26b1;Tbxas1;44808;Cyp2s1;Ahrr;Cyp4b1;Fdxr		R-HSA-76416;R-HSA-76354;R-HSA-211910;R-HSA-193997;R-HSA-193101;R-HSA-76496;R-HSA-76434;R-HSA-211991;R-HSA-76500;R-HSA-211924;R-HSA-211988;R-HSA-211929;R-HSA-192157;R-HSA-211874;R-HSA-211873;R-HSA-212007;R-HSA-215526;R-HSA-212005;R-HSA-212004;R-HSA-211951;R-HSA-76397;R-HSA-143468;R-HSA-193709;R-HSA-76466;R-HSA-193845;R-HSA-211962;R-HSA-76472;R-HSA-76475
R-HSA-74217	Purine salvage	1	45	0.00315325	0.963362	0.963362	2	12	0.000883848	9606	Homo sapiens	Pnp		R-HSA-112033;R-HSA-112034
R-HSA-2046106	alpha-linolenic acid (ALA) metabolism	1	45	0.00315325	0.963362	0.963362	1	15	0.00110481	9606	Homo sapiens	Abcd2		R-HSA-2046087
R-HSA-193775	Synthesis of bile acids and bile salts via 24-hydroxycholesterol	1	45	0.00315325	0.963362	0.963362	1	28	0.00206231	9606	Homo sapiens	Ptgis		R-HSA-193709
R-HSA-375165	NCAM signaling for neurite out-growth	2	70	0.00490505	0.964207	0.964207	3	23	0.00169404	9606	Homo sapiens	Cacna1h;Gfra1		R-HSA-525833;R-HSA-375149;R-HSA-375144
R-HSA-1500620	Meiosis	3	92	0.00644664	0.96465	0.96465	8	15	0.00110481	9606	Homo sapiens	Hist1h2ac;Hist1h4i;Trf		R-HSA-912408;R-HSA-912458;R-HSA-912503;R-HSA-912470;R-HSA-912496;R-HSA-1214188;R-HSA-912467;R-HSA-912450
R-HSA-9035034	RHOF GTPase cycle	1	46	0.00322332	0.965962	0.965962	1	3	0.000220962	9606	Homo sapiens	Pik3r1		R-HSA-9693282
R-HSA-975576	N-glycan antennae elongation in the medial/trans-Golgi	1	46	0.00322332	0.965962	0.965962	1	14	0.00103116	9606	Homo sapiens	Mgat3		R-HSA-975926
R-HSA-76002	Platelet activation, signaling and aggregation	14	293	0.0205311	0.966484	0.966484	40	116	0.00854386	9606	Homo sapiens	Tmsb4x;Gngt2;Syk;F13a1;Timp3;F5;Chid1;Abcc4;Islr;Rac2;Pik3r6;Pik3r1;Dgke;Itpr3		R-HSA-114689;R-HSA-139842;R-HSA-396996;R-HSA-397891;R-HSA-426240;R-HSA-392195;R-HSA-429441;R-HSA-428750;R-HSA-428749;R-HSA-396941;R-HSA-139854;R-HSA-443402;R-HSA-397835;R-HSA-429449;R-HSA-392202;R-HSA-434836;R-HSA-418581;R-HSA-418579;R-HSA-453200;R-HSA-428752;R-HSA-418576;R-HSA-5684801;R-HSA-429415;R-HSA-429157;R-HSA-442273;R-HSA-139941;R-HSA-351341;R-HSA-481007;R-HSA-437932;R-HSA-428909;R-HSA-43…
R-HSA-6794362	Protein-protein interactions at synapses	3	93	0.00651671	0.966547	0.966547	7	33	0.00243058	9606	Homo sapiens	Rtn1;Homer2;Ptprf		R-HSA-6794355;R-HSA-6798258;R-HSA-8855648;R-HSA-6794347;R-HSA-8849882;R-HSA-388824;R-HSA-6794344
R-HSA-6802957	Oncogenic MAPK signaling	3	93	0.00651671	0.966547	0.966547	6	46	0.00338808	9606	Homo sapiens	Clcn6;Esrp1;Dusp8		R-HSA-6802935;R-HSA-6802934;R-HSA-6802933;R-HSA-9652816;R-HSA-6802932;R-HSA-6802927
R-HSA-418594	G alpha (i) signalling events	22	426	0.0298507	0.967437	0.967437	30	74	0.00545039	9606	Homo sapiens	Ccr1;Gngt2;Opn1sw;Pmch;Cxcr1;Cxcr2;C5ar1;Aplnr;Fpr2;Cort;Ccr10;Pnp;44808;Pde4d;Pde1a;Adcy2;Cxcl1;Ccr5;Itpr3;Cxcl5		R-HSA-167427;R-HSA-392129;R-HSA-749454;R-HSA-167429;R-HSA-392206;R-HSA-167433;R-HSA-112271;R-HSA-169683;R-HSA-111955;R-HSA-751001;R-HSA-169680;R-HSA-111956;R-HSA-420883;R-HSA-749456;R-HSA-111962;R-HSA-8982637;R-HSA-170666;R-HSA-112042;R-HSA-380073;R-HSA-170671;R-HSA-170674;R-HSA-170672;R-HSA-167408;R-HSA-170676;R-HSA-170677;R-HSA-8982640;R-HSA-167419;R-HSA-111930;R-HSA-170686;R-HSA-170685
R-HSA-1169410	Antiviral mechanism by IFN-stimulated genes	3	94	0.00658678	0.968348	0.968348	4	31	0.00228327	9606	Homo sapiens	Oas2;Eif4a2;Tifa		R-HSA-8985097;R-HSA-1678842;R-HSA-8985104;R-HSA-8985138
R-HSA-156584	Cytosolic sulfonation of small molecules	2	72	0.0050452	0.968372	0.968372	7	24	0.0017677	9606	Homo sapiens	Sult1a1		R-HSA-158849;R-HSA-176646;R-HSA-158468;R-HSA-176474;R-HSA-176585;R-HSA-158860;R-HSA-176669
R-HSA-5358346	Hedgehog ligand biogenesis	2	72	0.0050452	0.968372	0.968372	4	15	0.00110481	9606	Homo sapiens	Notum;Syvn1		R-HSA-5362553;R-HSA-5362441;R-HSA-5362459;R-HSA-5362412
R-HSA-2428924	IGF1R signaling cascade	2	72	0.0050452	0.968372	0.968372	4	17	0.00125212	9606	Homo sapiens	Pde3b;Pik3r1		R-HSA-74737;R-HSA-109699;R-HSA-162363;R-HSA-162425
R-HSA-74751	Insulin receptor signalling cascade	2	72	0.0050452	0.968372	0.968372	4	25	0.00184135	9606	Homo sapiens	Pde3b;Pik3r1		R-HSA-74737;R-HSA-109699;R-HSA-162363;R-HSA-162425
R-HSA-5696395	Formation of Incision Complex in GG-NER	1	47	0.00329339	0.968377	0.968377	8	10	0.00073654	9606	Homo sapiens	Parp2		R-HSA-6790487;R-HSA-6790454;R-HSA-5690996;R-HSA-5689317;R-HSA-5689861;R-HSA-5696670;R-HSA-5690991;R-HSA-5691000
R-HSA-9646399	Aggrephagy	1	47	0.00329339	0.968377	0.968377	7	15	0.00110481	9606	Homo sapiens	Hdac6		R-HSA-9646354;R-HSA-9646679;R-HSA-9646390;R-HSA-9646347;R-HSA-9646383;R-HSA-9646685;R-HSA-9646348
R-HSA-196757	Metabolism of folate and pterines	1	47	0.00329339	0.968377	0.968377	2	30	0.00220962	9606	Homo sapiens	Mthfd1l		R-HSA-5696839;R-HSA-6801456
R-HSA-8878171	Transcriptional regulation by RUNX1	12	261	0.0182888	0.96882	0.96882	44	132	0.00972232	9606	Homo sapiens	Nfe2;Hist1h2ac;Ccnd2;Hist1h4i;Setd1a;Smarca2;Foxp3;Runx2		R-HSA-8936584;R-HSA-8937097;R-HSA-8937037;R-HSA-8938382;R-HSA-8877391;R-HSA-8865547;R-HSA-8865546;R-HSA-8877192;R-HSA-8938328;R-HSA-8937113;R-HSA-8937050;R-HSA-8877396;R-HSA-8865491;R-HSA-8936989;R-HSA-8937118;R-HSA-8936979;R-HSA-8865498;R-HSA-8936599;R-HSA-9006422;R-HSA-8936616;R-HSA-8938217;R-HSA-8877414;R-HSA-8877348;R-HSA-8936621;R-HSA-8865505;R-HSA-8877345;R-HSA-8936608;R-HSA-8936481;R-HSA-8…
R-HSA-6802952	Signaling by BRAF and RAF1 fusions	2	73	0.00511527	0.970275	0.970275	5	5	0.00036827	9606	Homo sapiens	Clcn6;Esrp1		R-HSA-6802935;R-HSA-6802934;R-HSA-6802933;R-HSA-6802932;R-HSA-6802927
R-HSA-174184	Cdc20:Phospho-APC/C mediated degradation of Cyclin A	2	73	0.00511527	0.970275	0.970275	3	3	0.000220962	9606	Homo sapiens	Apc2;Anapc10		R-HSA-174171;R-HSA-174104;R-HSA-174255
R-HSA-211981	Xenobiotics	2	73	0.00511527	0.970275	0.970275	13	22	0.00162039	9606	Homo sapiens	Cyp2s1;Ahrr		R-HSA-76416;R-HSA-76354;R-HSA-211910;R-HSA-212005;R-HSA-212004;R-HSA-76397;R-HSA-143468;R-HSA-76434;R-HSA-211991;R-HSA-211988;R-HSA-76472;R-HSA-76475;R-HSA-211929
R-HSA-2404192	Signaling by Type 1 Insulin-like Growth Factor 1 Receptor (IGF1R)	2	73	0.00511527	0.970275	0.970275	4	19	0.00139943	9606	Homo sapiens	Pde3b;Pik3r1		R-HSA-74737;R-HSA-109699;R-HSA-162363;R-HSA-162425
R-HSA-913709	O-linked glycosylation of mucins	2	73	0.00511527	0.970275	0.970275	2	17	0.00125212	9606	Homo sapiens	B3gnt2;Galnt2		R-HSA-913675;R-HSA-914010
R-HSA-1793185	Chondroitin sulfate/dermatan sulfate metabolism	2	73	0.00511527	0.970275	0.970275	2	28	0.00206231	9606	Homo sapiens	Hexa;Csgalnact1		R-HSA-1971482;R-HSA-2105001
R-HSA-549132	Organic cation/anion/zwitterion transport	1	48	0.00336346	0.970621	0.970621	1	12	0.000883848	9606	Homo sapiens	Slc22a15		R-HSA-549297
R-HSA-400508	Incretin synthesis, secretion, and inactivation	1	48	0.00336346	0.970621	0.970621	1	14	0.00103116	9606	Homo sapiens	Gata4		R-HSA-400500
R-HSA-166658	Complement cascade	6	156	0.0109313	0.971942	0.971942	34	71	0.00522943	9606	Homo sapiens	C4b;Cfh;C5ar2;C5ar1;Cfp		R-HSA-977359;R-HSA-977615;R-HSA-964811;R-HSA-173636;R-HSA-166795;R-HSA-977605;R-HSA-981637;R-HSA-977602;R-HSA-976768;R-HSA-977375;R-HSA-981535;R-HSA-977629;R-HSA-977626;R-HSA-981658;R-HSA-174551;R-HSA-977371;R-HSA-1006169;R-HSA-977363;R-HSA-977619;R-HSA-981648;R-HSA-981713;R-HSA-166817;R-HSA-166753;R-HSA-976810;R-HSA-375395;R-HSA-976743;R-HSA-8851436;R-HSA-2855047;R-HSA-981728;R-HSA-173680;R-HSA-…
R-HSA-174178	APC/C:Cdh1 mediated degradation of Cdc20 and other APC/C:Cdh1 targeted proteins in late mitosis/early G1	2	74	0.00518534	0.972067	0.972067	6	6	0.000441924	9606	Homo sapiens	Apc2;Anapc10		R-HSA-174195;R-HSA-9686980;R-HSA-9686969;R-HSA-174088;R-HSA-174105;R-HSA-188191
R-HSA-179419	APC:Cdc20 mediated degradation of cell cycle proteins prior to satisfation of the cell cycle checkpoint	2	74	0.00518534	0.972067	0.972067	6	6	0.000441924	9606	Homo sapiens	Apc2;Anapc10		R-HSA-179410;R-HSA-174171;R-HSA-174104;R-HSA-179417;R-HSA-174255;R-HSA-179421
R-HSA-163841	Gamma carboxylation, hypusine formation and arylsulfatase activation	2	74	0.00518534	0.972067	0.972067	6	40	0.00294616	9606	Homo sapiens	F9		R-HSA-159762;R-HSA-159795;R-HSA-159796;R-HSA-159803;R-HSA-159771;R-HSA-159836
R-HSA-5655302	Signaling by FGFR1 in disease	1	49	0.00343354	0.972706	0.972706	9	35	0.00257789	9606	Homo sapiens	Pik3r1		R-HSA-1839102;R-HSA-1839080;R-HSA-1839114;R-HSA-5655263;R-HSA-1839078;R-HSA-5655290;R-HSA-5655240;R-HSA-1839107;R-HSA-1839091
R-HSA-6811438	Intra-Golgi traffic	1	49	0.00343354	0.972706	0.972706	2	10	0.00073654	9606	Homo sapiens	Cyth2		R-HSA-8847883;R-HSA-8847880
R-HSA-983231	Factors involved in megakaryocyte development and platelet production	8	194	0.013594	0.972961	0.972961	13	43	0.00316712	9606	Homo sapiens	Nfe2;Klc3;Rad51b;Kif1a;Gata4;Acp1;Dock2		R-HSA-1011598;R-HSA-1008200;R-HSA-994148;R-HSA-983266;R-HSA-879459;R-HSA-1008220;R-HSA-983259;R-HSA-983194;R-HSA-994169;R-HSA-983285;R-HSA-996755;R-HSA-983218;R-HSA-1008240
R-HSA-5693606	DNA Double Strand Break Response	2	75	0.00525541	0.973755	0.973755	29	48	0.00353539	9606	Homo sapiens	Hist1h4i;Kdm4b		R-HSA-5683735;R-HSA-5682967;R-HSA-69891;R-HSA-5682965;R-HSA-5683986;R-HSA-5682588;R-HSA-5682586;R-HSA-5683930;R-HSA-5683801;R-HSA-5682629;R-HSA-5683077;R-HSA-5693583;R-HSA-5683405;R-HSA-5682992;R-HSA-5693566;R-HSA-5683967;R-HSA-5683964;R-HSA-5683384;R-HSA-5683385;R-HSA-5682598;R-HSA-5682983;R-HSA-5693602;R-HSA-5693536;R-HSA-5683425;R-HSA-5682607;R-HSA-5682863;R-HSA-5693551;R-HSA-5693549;R-HSA-568…
R-HSA-69017	CDK-mediated phosphorylation and removal of Cdc6	2	75	0.00525541	0.973755	0.973755	1	4	0.000294616	9606	Homo sapiens	Apc2;Anapc10		R-HSA-69015
R-HSA-73762	RNA Polymerase I Transcription Initiation	1	50	0.00350361	0.974643	0.974643	4	6	0.000441924	9606	Homo sapiens	Taf1d		R-HSA-73729;R-HSA-73736;R-HSA-73739;R-HSA-73758
R-HSA-379716	Cytosolic tRNA aminoacylation	1	50	0.00350361	0.974643	0.974643	1	21	0.00154673	9606	Homo sapiens	Wars		R-HSA-379977
R-HSA-212165	Epigenetic regulation of gene expression	5	139	0.00974003	0.97478	0.97478	26	34	0.00250424	9606	Homo sapiens	Hist1h2ac;Taf1d;Hist1h4i;Phf1;Tdg		R-HSA-5334097;R-HSA-427527;R-HSA-5334160;R-HSA-5334099;R-HSA-5334164;R-HSA-5221061;R-HSA-433672;R-HSA-427528;R-HSA-427336;R-HSA-427337;R-HSA-5220959;R-HSA-5250947;R-HSA-5334151;R-HSA-5334152;R-HSA-212252;R-HSA-427366;R-HSA-5250930;R-HSA-212263;R-HSA-5211239;R-HSA-5250938;R-HSA-5227490;R-HSA-212269;R-HSA-427383;R-HSA-5334179;R-HSA-427514;R-HSA-212222
R-HSA-877300	Interferon gamma signaling	11	250	0.017518	0.975313	0.975313	13	16	0.00117846	9606	Homo sapiens	Vcam1;Oas2;Ifngr1;Icam1;Irf5;Irf6		R-HSA-873924;R-HSA-873927;R-HSA-873926;R-HSA-1031716;R-HSA-873921;R-HSA-1031713;R-HSA-873922;R-HSA-877308;R-HSA-873919;R-HSA-9678561;R-HSA-873918;R-HSA-877269;R-HSA-909552
R-HSA-176409	APC/C:Cdc20 mediated degradation of mitotic proteins	2	76	0.00532549	0.975345	0.975345	13	13	0.000957502	9606	Homo sapiens	Apc2;Anapc10		R-HSA-174144;R-HSA-174120;R-HSA-174121;R-HSA-174255;R-HSA-174157;R-HSA-179410;R-HSA-174227;R-HSA-174202;R-HSA-174171;R-HSA-174104;R-HSA-179417;R-HSA-174238;R-HSA-179421
R-HSA-211000	Gene Silencing by RNA	4	120	0.00840866	0.976048	0.976048	6	40	0.00294616	9606	Homo sapiens	Piwil4;Hist1h2ac;Hist1h4i;Bcdin3d		R-HSA-5629237;R-HSA-5578742;R-HSA-5578717;R-HSA-5601919;R-HSA-5601897;R-HSA-5601883
R-HSA-4086400	PCP/CE pathway	3	99	0.00693715	0.976059	0.976059	4	24	0.0017677	9606	Homo sapiens	Wnt5b;Rac2;Wnt4		R-HSA-3858491;R-HSA-3858475;R-HSA-3858482;R-HSA-3858480
R-HSA-174417	Telomere C-strand (Lagging Strand) Synthesis	1	51	0.00357368	0.976443	0.976443	15	18	0.00132577	9606	Homo sapiens	Trf		R-HSA-174438;R-HSA-174439;R-HSA-9668597;R-HSA-174441;R-HSA-174446;R-HSA-174447;R-HSA-174444;R-HSA-174445;R-HSA-174451;R-HSA-174448;R-HSA-174452;R-HSA-174427;R-HSA-174456;R-HSA-174425;R-HSA-176702
R-HSA-5654743	Signaling by FGFR4	1	51	0.00357368	0.976443	0.976443	7	41	0.00301981	9606	Homo sapiens	Pik3r1		R-HSA-5654662;R-HSA-5654659;R-HSA-177931;R-HSA-5654669;R-HSA-5654717;R-HSA-5654714;R-HSA-5654667
R-HSA-75876	Synthesis of very long-chain fatty acyl-CoAs	1	51	0.00357368	0.976443	0.976443	1	12	0.000883848	9606	Homo sapiens	Slc27a3		R-HSA-8875077
R-HSA-176814	Activation of APC/C and APC/C:Cdc20 mediated degradation of mitotic proteins	2	77	0.00539556	0.976841	0.976841	15	15	0.00110481	9606	Homo sapiens	Apc2;Anapc10		R-HSA-174144;R-HSA-174119;R-HSA-174120;R-HSA-174121;R-HSA-174255;R-HSA-174157;R-HSA-179410;R-HSA-174227;R-HSA-174132;R-HSA-174202;R-HSA-174171;R-HSA-174104;R-HSA-179417;R-HSA-174238;R-HSA-179421
R-HSA-5218859	Regulated Necrosis	2	77	0.00539556	0.976841	0.976841	1	57	0.00419828	9606	Homo sapiens	Chmp4c		R-HSA-9647619
R-HSA-168249	Innate Immune System	80	1334	0.0934763	0.976972	0.976972	188	710	0.0522943	9606	Homo sapiens	Ctsc;Ctsd;Ncf1;Creg1;Cxcr1;Cxcr2;Ncf4;Prtn3;Atp6v0e2;Pnp;Rac2;Mcemp1;Olr1;Lbp;Atp6v0c;Acp1;Iqgap2;Glipr1;Dsp;Rab31;Fcgr3;Syk;Mmd;Pcbp3;Man2b1;Ano6;Mefv;Klrc1;C4b;Dok2;Pkm;Itgb2;Tifa;Mal;Pkp1;Tlr8;Tlr7;Pik3r1;Adgre5;Mgam;Rab24;Cfh;C5ar2;Unc93b1;C5ar1;Cotl1;Fpr2;Dnase1l1;Aldoc;Dtx4;Ccl17;Cfp;Dock2;Map2k6;Ly86;Clec12a;Kcnk2;Dpp7;Elmo1;Neu1;Hpse;Tcirg1;Cxcl1;Pak3;S100a9;Oscar;Ccr1;Pycard;Pygl;Cd209a;…		R-HSA-727819;R-HSA-975118;R-HSA-975115;R-HSA-975111;R-HSA-2395439;R-HSA-975106;R-HSA-5621573;R-HSA-975134;R-HSA-981535;R-HSA-9645442;R-HSA-5607745;R-HSA-5621571;R-HSA-450333;R-HSA-975125;R-HSA-879377;R-HSA-5621366;R-HSA-5621363;R-HSA-9679029;R-HSA-450346;R-HSA-167983;R-HSA-9645501;R-HSA-5621370;R-HSA-2395412;R-HSA-937022;R-HSA-990526;R-HSA-5621606;R-HSA-5621347;R-HSA-8951486;R-HSA-975160;R-HSA-56…
R-HSA-71406	Pyruvate metabolism and Citric Acid (TCA) cycle	3	100	0.00700722	0.97737	0.97737	4	36	0.00265154	9606	Homo sapiens	Ldha;Pdk4;Pkp1		R-HSA-71849;R-HSA-203946;R-HSA-9011543;R-HSA-70510
R-HSA-9679506	SARS-CoV Infections	9	217	0.0152057	0.977786	0.977786	7	256	0.0188554	9606	Homo sapiens	Fxyd3;Itga4;Atp1b2;Chmp4c;Atp1a3;Ifngr1;Rbp1;Tlr7		R-HSA-9678561;R-HSA-9679029;R-HSA-9684068;R-HSA-9679787;R-HSA-9687435;R-HSA-9698265;R-HSA-9679740
R-HSA-190828	Gap junction trafficking	1	52	0.00364375	0.978116	0.978116	4	20	0.00147308	9606	Homo sapiens	Dab2		R-HSA-196017;R-HSA-190519;R-HSA-196026;R-HSA-190829
R-HSA-187037	Signaling by NTRK1 (TRKA)	5	143	0.0100203	0.979239	0.979239	7	102	0.00751271	9606	Homo sapiens	Adora2a;Sh3gl3;Id4;Pik3r1		R-HSA-9612534;R-HSA-9613476;R-HSA-198315;R-HSA-198266;R-HSA-9619838;R-HSA-9613023;R-HSA-187661
R-HSA-6783310	Fanconi Anemia Pathway	1	53	0.00371383	0.979669	0.979669	10	15	0.00110481	9606	Homo sapiens	Fancd2		R-HSA-6786166;R-HSA-6785732;R-HSA-6785986;R-HSA-6785361;R-HSA-6788385;R-HSA-6785342;R-HSA-6786171;R-HSA-6786155;R-HSA-6785594;R-HSA-6788392
R-HSA-5654741	Signaling by FGFR3	1	53	0.00371383	0.979669	0.979669	7	43	0.00316712	9606	Homo sapiens	Pik3r1		R-HSA-5654709;R-HSA-5654643;R-HSA-5654640;R-HSA-5654641;R-HSA-5654705;R-HSA-177931;R-HSA-5654637
R-HSA-76009	Platelet Aggregation (Plug Formation)	1	53	0.00371383	0.979669	0.979669	2	27	0.00198866	9606	Homo sapiens	Syk		R-HSA-429415;R-HSA-429441
R-HSA-195258	RHO GTPase Effectors	15	326	0.0228435	0.980467	0.980467	47	113	0.0083229	9606	Homo sapiens	Hist1h2ac;Rtkn;Ncf1;Ncf4;Myh14;Ppp1r12b;Mylk;Klc3;Hist1h4i;Rac2;Speg;Mal;Pak3;S100a9;Iqgap2		R-HSA-9626832;R-HSA-5668629;R-HSA-5666197;R-HSA-5218827;R-HSA-5668947;R-HSA-5672083;R-HSA-5666001;R-HSA-5671772;R-HSA-419083;R-HSA-5666008;R-HSA-5625883;R-HSA-5625797;R-HSA-5625796;R-HSA-5668932;R-HSA-9626880;R-HSA-9626816;R-HSA-9626817;R-HSA-5666178;R-HSA-442832;R-HSA-5218841;R-HSA-5666049;R-HSA-5665998;R-HSA-5665999;R-HSA-5625870;R-HSA-5626507;R-HSA-5626549;R-HSA-445797;R-HSA-5668978;R-HSA-4192…
R-HSA-199977	ER to Golgi Anterograde Transport	6	164	0.0114918	0.980566	0.980566	22	39	0.0028725	9606	Homo sapiens	Ctsc;Ank3;Acp1;Sec22c;Sec24d;F5		R-HSA-5694423;R-HSA-6807877;R-HSA-5694421;R-HSA-5694418;R-HSA-6807875;R-HSA-203973;R-HSA-5694417;R-HSA-5694431;R-HSA-5694527;R-HSA-6809006;R-HSA-5694428;R-HSA-204008;R-HSA-5694522;R-HSA-6809003;R-HSA-5694425;R-HSA-5694439;R-HSA-6809011;R-HSA-6809010;R-HSA-5694446;R-HSA-5694413;R-HSA-5694441;R-HSA-5694409
R-HSA-74259	Purine catabolism	2	80	0.00560577	0.98082	0.98082	3	33	0.00243058	9606	Homo sapiens	Pnp;Gda		R-HSA-74242;R-HSA-74249;R-HSA-74255
R-HSA-499943	Interconversion of nucleotide di- and triphosphates	2	80	0.00560577	0.98082	0.98082	2	33	0.00243058	9606	Homo sapiens	Gsr;Dctd		R-HSA-71682;R-HSA-73596
R-HSA-168181	Toll Like Receptor 7/8 (TLR7/8) Cascade	3	103	0.00721743	0.980905	0.980905	20	66	0.00486116	9606	Homo sapiens	Tlr8;Tlr7;Map2k6		R-HSA-975118;R-HSA-975180;R-HSA-975115;R-HSA-9679029;R-HSA-975111;R-HSA-975175;R-HSA-450346;R-HSA-975106;R-HSA-975170;R-HSA-167983;R-HSA-975134;R-HSA-975100;R-HSA-975098;R-HSA-975160;R-HSA-9691204;R-HSA-975188;R-HSA-975156;R-HSA-450333;R-HSA-975125;R-HSA-450296
R-HSA-72695	Formation of the ternary complex, and subsequently, the 43S complex	1	54	0.0037839	0.981113	0.981113	1	3	0.000220962	9606	Homo sapiens	Rps16		R-HSA-72691
R-HSA-163685	Integration of energy metabolism	5	145	0.0101605	0.981181	0.981181	15	62	0.00456655	9606	Homo sapiens	Adipor2;Gngt2;Kcnb1;Adcy2;Itpr3		R-HSA-163617;R-HSA-400037;R-HSA-400097;R-HSA-400046;R-HSA-163691;R-HSA-381612;R-HSA-381644;R-HSA-381706;R-HSA-8848663;R-HSA-169683;R-HSA-169680;R-HSA-381713;R-HSA-422320;R-HSA-400092;R-HSA-164377
R-HSA-196854	Metabolism of vitamins and cofactors	18	379	0.0265574	0.98171	0.98171	33	206	0.0151727	9606	Homo sapiens	Mthfd1l;Apc2;Slc5a6;Rdh11;Mmab;Gda;Enpp2;Lrp8;Mocs3;Ptgis;Tcn2;Ccdc57;Rbp1;Acp5;Mal;Cd38;Ldlr;Pnpo		R-HSA-3000109;R-HSA-8938314;R-HSA-975629;R-HSA-2404131;R-HSA-2404140;R-HSA-2404142;R-HSA-2423785;R-HSA-2404137;R-HSA-5696839;R-HSA-76496;R-HSA-8938076;R-HSA-2404144;R-HSA-965019;R-HSA-196950;R-HSA-6801456;R-HSA-3000122;R-HSA-965079;R-HSA-2424254;R-HSA-2395768;R-HSA-947538;R-HSA-3000112;R-HSA-199202;R-HSA-947499;R-HSA-199206;R-HSA-3159253;R-HSA-3000074;R-HSA-3000263;R-HSA-2395784;R-HSA-2429643;R-H…
R-HSA-8957322	Metabolism of steroids	15	328	0.0229837	0.981767	0.981767	32	244	0.0179716	9606	Homo sapiens	Fdps;Hsd17b7;Dhcr7;Lss;Sec24d;Stard4;Ptgis;44808;Star;Ccdc57;Rbp1;Fdxr;Tmem221		R-HSA-1655834;R-HSA-194689;R-HSA-191366;R-HSA-191303;R-HSA-2426147;R-HSA-1655825;R-HSA-1655824;R-HSA-1655827;R-HSA-194632;R-HSA-1655828;R-HSA-2426155;R-HSA-193997;R-HSA-193101;R-HSA-2426154;R-HSA-191322;R-HSA-196126;R-HSA-469659;R-HSA-193054;R-HSA-192157;R-HSA-8951850;R-HSA-9705713;R-HSA-9705714;R-HSA-6807055;R-HSA-193064;R-HSA-193065;R-HSA-193070;R-HSA-193709;R-HSA-196402;R-HSA-193073;R-HSA-1960…
R-HSA-159236	Transport of Mature mRNA derived from an Intron-Containing Transcript	2	81	0.00567585	0.981993	0.981993	4	4	0.000294616	9606	Homo sapiens	Tifa;Rbp1		R-HSA-75097;R-HSA-75096;R-HSA-75098;R-HSA-159101
R-HSA-5578749	Transcriptional regulation by small RNAs	2	81	0.00567585	0.981993	0.981993	1	5	0.00036827	9606	Homo sapiens	Hist1h2ac;Hist1h4i		R-HSA-5578742
R-HSA-75105	Fatty acyl-CoA biosynthesis	2	81	0.00567585	0.981993	0.981993	2	24	0.0017677	9606	Homo sapiens	Ppt2;Slc27a3		R-HSA-8875077;R-HSA-5690046
R-HSA-3858494	Beta-catenin independent WNT signaling	6	166	0.011632	0.982297	0.982297	13	51	0.00375635	9606	Homo sapiens	Gngt2;Pde6g;Wnt5b;Rac2;Itpr3;Wnt4		R-HSA-3858491;R-HSA-4086392;R-HSA-4086393;R-HSA-3858482;R-HSA-3858480;R-HSA-3858475;R-HSA-169680;R-HSA-398193;R-HSA-4420052;R-HSA-3965444;R-HSA-3965447;R-HSA-3965441;R-HSA-398040
R-HSA-2046104	alpha-linolenic (omega3) and linoleic (omega6) acid metabolism	1	55	0.00385397	0.982454	0.982454	2	25	0.00184135	9606	Homo sapiens	Abcd2		R-HSA-2046093;R-HSA-2046087
R-HSA-1483191	Synthesis of PC	1	55	0.00385397	0.982454	0.982454	1	18	0.00132577	9606	Homo sapiens	Pcyt1b		R-HSA-1483081
R-HSA-202403	TCR signaling	5	147	0.0103006	0.982952	0.982952	9	52	0.00383001	9606	Homo sapiens	Ptpn22;Pik3r1;Pak3;Pag1;Cd101		R-HSA-430183;R-HSA-8855381;R-HSA-8855375;R-HSA-202203;R-HSA-202233;R-HSA-202248;R-HSA-203774;R-HSA-202365;R-HSA-8852200
R-HSA-72165	mRNA Splicing - Minor Pathway	1	56	0.00392404	0.983699	0.983699	5	5	0.00036827	9606	Homo sapiens	Snrpf		R-HSA-75079;R-HSA-75081;R-HSA-75080;R-HSA-75083;R-HSA-75082
R-HSA-5620924	Intraflagellar transport	1	56	0.00392404	0.983699	0.983699	8	12	0.000883848	9606	Homo sapiens	Ttc26		R-HSA-5624949;R-HSA-5617825;R-HSA-5625424;R-HSA-5625426;R-HSA-5625421;R-HSA-5617820;R-HSA-5624952;R-HSA-5625416
R-HSA-157858	Gap junction trafficking and regulation	1	56	0.00392404	0.983699	0.983699	4	24	0.0017677	9606	Homo sapiens	Dab2		R-HSA-196017;R-HSA-190519;R-HSA-196026;R-HSA-190829
R-HSA-422356	Regulation of insulin secretion	3	106	0.00742765	0.983909	0.983909	11	34	0.00250424	9606	Homo sapiens	Gngt2;Kcnb1;Itpr3		R-HSA-169683;R-HSA-169680;R-HSA-400037;R-HSA-381713;R-HSA-422320;R-HSA-400097;R-HSA-400046;R-HSA-381612;R-HSA-381644;R-HSA-400092;R-HSA-381706
R-HSA-176408	Regulation of APC/C activators between G1/S and early anaphase	2	83	0.00581599	0.984133	0.984133	4	14	0.00103116	9606	Homo sapiens	Apc2;Anapc10		R-HSA-188371;R-HSA-174139;R-HSA-141423;R-HSA-174079
R-HSA-1169408	ISG15 antiviral mechanism	2	83	0.00581599	0.984133	0.984133	1	16	0.00117846	9606	Homo sapiens	Eif4a2;Tifa		R-HSA-1678842
R-HSA-6805567	Keratinization	9	226	0.0158363	0.984646	0.984646	19	34	0.00250424	9606	Homo sapiens	Dsp;Cdsn;Krt17;Perp;Pkp2;Pkp1;Pkp3;Evpl		R-HSA-6814695;R-HSA-6806629;R-HSA-6805573;R-HSA-6814734;R-HSA-6810894;R-HSA-6814764;R-HSA-6814187;R-HSA-6805546;R-HSA-6810357;R-HSA-6806613;R-HSA-6814387;R-HSA-6811539;R-HSA-6806610;R-HSA-6809393;R-HSA-8942224;R-HSA-6809663;R-HSA-6810843;R-HSA-6814298;R-HSA-6810937
R-HSA-2730905	Role of LAT2/NTAL/LAB on calcium mobilization	3	107	0.00749772	0.984806	0.984806	4	7	0.000515578	9606	Homo sapiens	Syk;Pik3r1;Ms4a2		R-HSA-2730842;R-HSA-2730860;R-HSA-2730884;R-HSA-2730870
R-HSA-6811434	COPI-dependent Golgi-to-ER retrograde traffic	3	107	0.00749772	0.984806	0.984806	2	11	0.000810194	9606	Homo sapiens	Klc3;Kif1a		R-HSA-6811426;R-HSA-6811423
R-HSA-2173793	Transcriptional activity of SMAD2/SMAD3:SMAD4 heterotrimer	1	57	0.00399411	0.984857	0.984857	35	44	0.00324077	9606	Homo sapiens	Smad2		R-HSA-2187303;R-HSA-870538;R-HSA-9736979;R-HSA-2176491;R-HSA-9736984;R-HSA-2187309;R-HSA-2186607;R-HSA-2186741;R-HSA-1484099;R-HSA-2176503;R-HSA-2176502;R-HSA-2186747;R-HSA-209055;R-HSA-2187325;R-HSA-2187388;R-HSA-170847;R-HSA-9736970;R-HSA-2187395;R-HSA-2187330;R-HSA-2031355;R-HSA-2179274;R-HSA-173481;R-HSA-173545;R-HSA-9736959;R-HSA-2179276;R-HSA-173488;R-HSA-2186643;R-HSA-2106579;R-HSA-9736992…
R-HSA-5693571	Nonhomologous End-Joining (NHEJ)	1	57	0.00399411	0.984857	0.984857	4	13	0.000957502	9606	Homo sapiens	Hist1h4i		R-HSA-5686900;R-HSA-5686704;R-HSA-5693599;R-HSA-5686685
R-HSA-198933	Immunoregulatory interactions between a Lymphoid and a non-Lymphoid cell	14	316	0.0221428	0.984893	0.984893	12	44	0.00324077	9606	Homo sapiens	Cd300ld;Cd1d1;Fcgr3;Cd300lf;Klrg1;Itgb7;Mafa;Klrc1;Vcam1;Itga4;Itgb2;Icam1;Mal;Oscar		R-HSA-5696358;R-HSA-8850326;R-HSA-5696356;R-HSA-8850356;R-HSA-199079;R-HSA-199062;R-HSA-198955;R-HSA-199050;R-HSA-199161;R-HSA-199032;R-HSA-198941;R-HSA-9679740
R-HSA-2029485	Role of phospholipids in phagocytosis	4	129	0.00903931	0.985071	0.985071	7	12	0.000883848	9606	Homo sapiens	Fcgr3;Syk;Pik3r1;Itpr3		R-HSA-169683;R-HSA-169680;R-HSA-2029272;R-HSA-2029273;R-HSA-2029270;R-HSA-2029271;R-HSA-2029268
R-HSA-196807	Nicotinate metabolism	2	84	0.00588606	0.985108	0.985108	2	29	0.00213597	9606	Homo sapiens	Ptgis;Cd38		R-HSA-76496;R-HSA-8938076
R-HSA-1632852	Macroautophagy	5	150	0.0105108	0.985317	0.985317	15	87	0.0064079	9606	Homo sapiens	Chmp4c;Atg4c;Plin2;Hdac6		R-HSA-9646354;R-HSA-5682388;R-HSA-9646679;R-HSA-9646390;R-HSA-9613530;R-HSA-9646685;R-HSA-9613565;R-HSA-9613666;R-HSA-5681987;R-HSA-9646347;R-HSA-9613352;R-HSA-9613513;R-HSA-9646383;R-HSA-9646348;R-HSA-5682377
R-HSA-425397	Transport of vitamins, nucleosides, and related molecules	3	108	0.00756779	0.985655	0.985655	2	39	0.0028725	9606	Homo sapiens	Slc5a6;Slc27a1;Slc27a6		R-HSA-429581;R-HSA-879585
R-HSA-9006934	Signaling by Receptor Tyrosine Kinases	32	618	0.0433046	0.985906	0.985906	158	746	0.0549459	9606	Homo sapiens	Wwox;Adora2a;Nrp2;Ncf1;Ncf4;Erbb3;Atp6v0e2;Fgfbp1;Epgn;Elmo1;Id4;Tcirg1;Cma1;Atp6v0c;Pak3;Pag1;Sh3gl3;Esrp2;Col24a1;Esrp1;Atp6v0d2;Hgfac;Btc;Lama5;Fer;Lama1;Pde3b;Gabrb3;Pik3r1;Itpr3		R-HSA-177922;R-HSA-5654614;R-HSA-177923;R-HSA-8848005;R-HSA-5654612;R-HSA-6785636;R-HSA-177926;R-HSA-177927;R-HSA-177924;R-HSA-1562641;R-HSA-177925;R-HSA-177930;R-HSA-5654622;R-HSA-183051;R-HSA-177931;R-HSA-5654620;R-HSA-1433374;R-HSA-177934;R-HSA-177935;R-HSA-183055;R-HSA-177933;R-HSA-187661;R-HSA-177938;R-HSA-183058;R-HSA-9028505;R-HSA-177939;R-HSA-177936;R-HSA-5654596;R-HSA-177937;R-HSA-205328…
R-HSA-5655253	Signaling by FGFR2 in disease	1	58	0.00406419	0.985932	0.985932	3	28	0.00206231	9606	Homo sapiens	Pik3r1		R-HSA-5655245;R-HSA-5655323;R-HSA-5655320
R-HSA-209776	Metabolism of amine-derived hormones	1	58	0.00406419	0.985932	0.985932	1	21	0.00154673	9606	Homo sapiens	Dio2		R-HSA-209772
R-HSA-162909	Host Interactions of HIV factors	5	151	0.0105809	0.986034	0.986034	4	54	0.00397731	9606	Homo sapiens	Ap1m2;Ap1s2;Elmo1;Dock2		R-HSA-182263;R-HSA-182279;R-HSA-200952;R-HSA-182286
R-HSA-381340	Transcriptional regulation of white adipocyte differentiation	3	109	0.00763787	0.986458	0.986458	3	18	0.00132577	9606	Homo sapiens	Cklf;Wnt10b		R-HSA-560491;R-HSA-381377;R-HSA-381283
R-HSA-197264	Nicotinamide salvaging	1	59	0.00413426	0.986931	0.986931	1	12	0.000883848	9606	Homo sapiens	Ptgis		R-HSA-76496
R-HSA-193704	p75 NTR receptor-mediated signalling	3	110	0.00770794	0.987218	0.987218	38	50	0.0036827	9606	Homo sapiens	Ngfr;Arhgef16;Ngef		R-HSA-193665;R-HSA-193668;R-HSA-193669;R-HSA-193672;R-HSA-193679;R-HSA-193677;R-HSA-205132;R-HSA-9012761;R-HSA-193682;R-HSA-193686;R-HSA-204949;R-HSA-193684;R-HSA-193694;R-HSA-204958;R-HSA-209566;R-HSA-193695;R-HSA-193696;R-HSA-193702;R-HSA-193703;R-HSA-209573;R-HSA-193636;R-HSA-193700;R-HSA-193642;R-HSA-193643;R-HSA-193641;R-HSA-193705;R-HSA-205039;R-HSA-193646;R-HSA-193647;R-HSA-193650;R-HSA-19…
R-HSA-3214847	HATs acetylate histones	3	110	0.00770794	0.987218	0.987218	10	15	0.00110481	9606	Homo sapiens	Hist1h2ac;Hist1h4i;Smap2		R-HSA-5144542;R-HSA-3301345;R-HSA-3321975;R-HSA-3662335;R-HSA-3697008;R-HSA-3697920;R-HSA-3321883;R-HSA-3662318;R-HSA-3318415;R-HSA-3321805
R-HSA-9614085	FOXO-mediated transcription	3	110	0.00770794	0.987218	0.987218	56	85	0.00626059	9606	Homo sapiens	Smad2;44808;Foxo3		R-HSA-199299;R-HSA-9624976;R-HSA-9621270;R-HSA-9625749;R-HSA-9620891;R-HSA-9623192;R-HSA-9624985;R-HSA-9625375;R-HSA-9623427;R-HSA-9625091;R-HSA-9623168;R-HSA-9625092;R-HSA-9622667;R-HSA-9622668;R-HSA-9622579;R-HSA-9620915;R-HSA-9625520;R-HSA-9617840;R-HSA-9624624;R-HSA-9620532;R-HSA-9620788;R-HSA-9617972;R-HSA-9617848;R-HSA-9625406;R-HSA-9617852;R-HSA-9617853;R-HSA-9625378;R-HSA-9620515;R-HSA-96…
R-HSA-170834	Signaling by TGF-beta Receptor Complex	2	87	0.00609628	0.987697	0.987697	46	88	0.00648155	9606	Homo sapiens	Smad2;Bambi		R-HSA-2187303;R-HSA-870538;R-HSA-9736979;R-HSA-2176491;R-HSA-9736984;R-HSA-2187309;R-HSA-2186607;R-HSA-170835;R-HSA-2186741;R-HSA-1484099;R-HSA-2176503;R-HSA-2176502;R-HSA-2186747;R-HSA-209055;R-HSA-2176445;R-HSA-2187325;R-HSA-2187388;R-HSA-170847;R-HSA-9736970;R-HSA-170850;R-HSA-2187395;R-HSA-2187330;R-HSA-173542;R-HSA-2176452;R-HSA-2031355;R-HSA-2187401;R-HSA-173483;R-HSA-2179274;R-HSA-173481;R…
R-HSA-6794361	Neurexins and neuroligins	1	60	0.00420433	0.98786	0.98786	3	19	0.00139943	9606	Homo sapiens	Homer2		R-HSA-6794355;R-HSA-6794347;R-HSA-6794344
R-HSA-4085001	Sialic acid metabolism	1	60	0.00420433	0.98786	0.98786	1	21	0.00154673	9606	Homo sapiens	Neu1		R-HSA-4084999
R-HSA-157579	Telomere Maintenance	3	111	0.00777801	0.987936	0.987936	28	34	0.00250424	9606	Homo sapiens	Hist1h2ac;Hist1h4i;Trf		R-HSA-9670101;R-HSA-181450;R-HSA-164617;R-HSA-164620;R-HSA-163090;R-HSA-9670149;R-HSA-163099;R-HSA-174427;R-HSA-163096;R-HSA-174425;R-HSA-174438;R-HSA-174439;R-HSA-9668597;R-HSA-9686521;R-HSA-174441;R-HSA-174446;R-HSA-174447;R-HSA-174444;R-HSA-174445;R-HSA-9686524;R-HSA-9670114;R-HSA-174451;R-HSA-174448;R-HSA-163120;R-HSA-174452;R-HSA-174456;R-HSA-176702;R-HSA-176700
R-HSA-5362768	Hh mutants are degraded by ERAD	1	61	0.0042744	0.988722	0.988722	3	6	0.000441924	9606	Homo sapiens	Syvn1		R-HSA-5483238;R-HSA-5387386;R-HSA-5387389
R-HSA-8866654	E3 ubiquitin ligases ubiquitinate target proteins	1	61	0.0042744	0.988722	0.988722	2	16	0.00117846	9606	Homo sapiens	Derl1		R-HSA-8943080;R-HSA-8943083
R-HSA-109582	Hemostasis	43	803	0.056268	0.988979	0.988979	119	334	0.0246004	9606	Homo sapiens	Rad51b;Lrp8;Prtn3;Itga6;Dock2;Klc3;Itga4;Rac2;Olr1;Angpt1;Acp1;Dgke;Mertk;Tmsb4x;Ccr1;Nfe2;Itga10;Gngt2;Cd84;Syk;Atp1b2;Atp2b4;Gypc;F13a1;Timp3;Kif1a;Sirpa;F5;Chid1;Abcc4;Ptgir;Islr;Dok2;F9;Itgb2;Pde1a;Serpine2;Pik3r6;Gata4;Pik3r1;Itpr3		R-HSA-114689;R-HSA-5606996;R-HSA-391942;R-HSA-418309;R-HSA-426240;R-HSA-392195;R-HSA-432129;R-HSA-5607004;R-HSA-443402;R-HSA-397835;R-HSA-204813;R-HSA-5607002;R-HSA-392202;R-HSA-418581;R-HSA-5604929;R-HSA-140823;R-HSA-418579;R-HSA-418576;R-HSA-5684801;R-HSA-210974;R-HSA-159005;R-HSA-210977;R-HSA-140840;R-HSA-140847;R-HSA-204850;R-HSA-140851;R-HSA-140599;R-HSA-453183;R-HSA-5607023;R-HSA-204861;R-H…
R-HSA-9663891	Selective autophagy	2	89	0.00623642	0.989173	0.989173	12	48	0.00353539	9606	Homo sapiens	Plin2;Hdac6		R-HSA-9613666;R-HSA-9646354;R-HSA-9646679;R-HSA-9646390;R-HSA-9613530;R-HSA-9646347;R-HSA-9613352;R-HSA-9613513;R-HSA-9646383;R-HSA-9646685;R-HSA-9613565;R-HSA-9646348
R-HSA-977225	Amyloid fiber formation	2	89	0.00623642	0.989173	0.989173	1	33	0.00243058	9606	Homo sapiens	Hist1h2ac;Hist1h4i		R-HSA-977224
R-HSA-3371556	Cellular response to heat stress	4	135	0.00945974	0.989178	0.989178	9	29	0.00213597	9606	Homo sapiens	Hsph1;Cryba4;Hdac6		R-HSA-3371554;R-HSA-4793819;R-HSA-3371467;R-HSA-5324632;R-HSA-5082356;R-HSA-5082369;R-HSA-5082384;R-HSA-3371518;R-HSA-5252079
R-HSA-3371453	Regulation of HSF1-mediated heat shock response	3	113	0.00791816	0.989259	0.989259	3	14	0.00103116	9606	Homo sapiens	Hsph1;Cryba4		R-HSA-3371467;R-HSA-3371518;R-HSA-5252079
R-HSA-5654736	Signaling by FGFR1	1	62	0.00434447	0.989523	0.989523	7	48	0.00353539	9606	Homo sapiens	Pik3r1		R-HSA-5654692;R-HSA-5654596;R-HSA-5654594;R-HSA-5654690;R-HSA-5654592;R-HSA-5654591;R-HSA-177931
R-HSA-4551638	SUMOylation of chromatin organization proteins	1	62	0.00434447	0.989523	0.989523	2	15	0.00110481	9606	Homo sapiens	Hist1h4i		R-HSA-4570485;R-HSA-4570496
R-HSA-72202	Transport of Mature Transcript to Cytoplasm	2	90	0.0063065	0.989845	0.989845	4	13	0.000957502	9606	Homo sapiens	Tifa;Rbp1		R-HSA-75097;R-HSA-75096;R-HSA-75098;R-HSA-159101
R-HSA-390918	Peroxisomal lipid metabolism	2	90	0.0063065	0.989845	0.989845	2	35	0.00257789	9606	Homo sapiens	Abcd2;Nudt19		R-HSA-390393;R-HSA-6810474
R-HSA-428157	Sphingolipid metabolism	5	158	0.0110714	0.990201	0.990201	6	64	0.00471385	9606	Homo sapiens	Galc;Cerk;Hexa;Neu1;Cers6		R-HSA-1605595;R-HSA-1605724;R-HSA-1638845;R-HSA-1605632;R-HSA-1606564;R-HSA-428185
R-HSA-9012852	Signaling by NOTCH3	1	63	0.00441455	0.990267	0.990267	35	37	0.0027252	9606	Homo sapiens	Notch3		R-HSA-9021451;R-HSA-9021450;R-HSA-9013069;R-HSA-9018573;R-HSA-9021325;R-HSA-9018572;R-HSA-157124;R-HSA-9013568;R-HSA-9017797;R-HSA-9017817;R-HSA-9016861;R-HSA-9021406;R-HSA-9021520;R-HSA-9021523;R-HSA-157145;R-HSA-9016916;R-HSA-9013652;R-HSA-9021480;R-HSA-9018538;R-HSA-9016751;R-HSA-9018542;R-HSA-2168136;R-HSA-9013284;R-HSA-9021412;R-HSA-157100;R-HSA-9021478;R-HSA-157937;R-HSA-9014141;R-HSA-90178…
R-HSA-4839726	Chromatin organization	10	256	0.0179385	0.990476	0.990476	40	85	0.00626059	9606	Homo sapiens	Hist1h2ac;Hist1h4i;Setd1a;Rbp1;Smarca2;Kdm4b;Smap2;Kdm6b;Art3		R-HSA-5159245;R-HSA-4754187;R-HSA-5244692;R-HSA-3321975;R-HSA-3782655;R-HSA-3662335;R-HSA-5212679;R-HSA-3697008;R-HSA-3777129;R-HSA-5661126;R-HSA-5144542;R-HSA-5651654;R-HSA-5661124;R-HSA-5661125;R-HSA-3301345;R-HSA-8879123;R-HSA-3782637;R-HSA-5661120;R-HSA-5661121;R-HSA-3662318;R-HSA-5229203;R-HSA-3769447;R-HSA-5423117;R-HSA-5651657;R-HSA-5637686;R-HSA-5205867;R-HSA-5216234;R-HSA-5205799;R-HSA-3…
R-HSA-3247509	Chromatin modifying enzymes	10	256	0.0179385	0.990476	0.990476	40	85	0.00626059	9606	Homo sapiens	Hist1h2ac;Hist1h4i;Setd1a;Rbp1;Smarca2;Kdm4b;Smap2;Kdm6b;Art3		R-HSA-5159245;R-HSA-4754187;R-HSA-5244692;R-HSA-3321975;R-HSA-3782655;R-HSA-3662335;R-HSA-5212679;R-HSA-3697008;R-HSA-3777129;R-HSA-5661126;R-HSA-5144542;R-HSA-5651654;R-HSA-5661124;R-HSA-5661125;R-HSA-3301345;R-HSA-8879123;R-HSA-3782637;R-HSA-5661120;R-HSA-5661121;R-HSA-3662318;R-HSA-5229203;R-HSA-3769447;R-HSA-5423117;R-HSA-5651657;R-HSA-5637686;R-HSA-5205867;R-HSA-5216234;R-HSA-5205799;R-HSA-3…
R-HSA-6811442	Intra-Golgi and retrograde Golgi-to-ER traffic	8	219	0.0153458	0.990793	0.990793	13	48	0.00353539	9606	Homo sapiens	Cyth2;Klc3;Usp6nl;Kif1a;Galnt2;Acp1;Rab6b		R-HSA-6811431;R-HSA-8849350;R-HSA-6811429;R-HSA-6811428;R-HSA-8849348;R-HSA-6811426;R-HSA-8847534;R-HSA-8847883;R-HSA-8849353;R-HSA-8847880;R-HSA-8847537;R-HSA-6811423;R-HSA-6814682
R-HSA-5387390	Hh mutants abrogate ligand secretion	1	64	0.00448462	0.990959	0.990959	3	7	0.000515578	9606	Homo sapiens	Syvn1		R-HSA-5483238;R-HSA-5387386;R-HSA-5387389
R-HSA-9006936	Signaling by TGFB family members	3	116	0.00812837	0.990985	0.990985	54	113	0.0083229	9606	Homo sapiens	Smad2;Inhba;Bambi		R-HSA-2187303;R-HSA-870538;R-HSA-9736979;R-HSA-9736984;R-HSA-2187309;R-HSA-209055;R-HSA-2176445;R-HSA-2187325;R-HSA-9736970;R-HSA-2187395;R-HSA-2187401;R-HSA-173483;R-HSA-173481;R-HSA-2187405;R-HSA-1225919;R-HSA-173488;R-HSA-2186643;R-HSA-9736992;R-HSA-2127257;R-HSA-870449;R-HSA-2187293;R-HSA-1549526;R-HSA-2473184;R-HSA-2473186;R-HSA-2470508;R-HSA-2176491;R-HSA-2186607;R-HSA-1181149;R-HSA-170835;…
R-HSA-174143	APC/C-mediated degradation of cell cycle proteins	2	92	0.00644664	0.991069	0.991069	29	40	0.00294616	9606	Homo sapiens	Apc2;Anapc10		R-HSA-174144;R-HSA-174088;R-HSA-174157;R-HSA-179410;R-HSA-174227;R-HSA-188371;R-HSA-174224;R-HSA-9686980;R-HSA-174171;R-HSA-174104;R-HSA-174105;R-HSA-179417;R-HSA-174238;R-HSA-188191;R-HSA-179421;R-HSA-174119;R-HSA-174058;R-HSA-9686969;R-HSA-174120;R-HSA-174057;R-HSA-174121;R-HSA-174255;R-HSA-141423;R-HSA-174195;R-HSA-174070;R-HSA-174132;R-HSA-174202;R-HSA-174139;R-HSA-174079
R-HSA-453276	Regulation of mitotic cell cycle	2	92	0.00644664	0.991069	0.991069	29	40	0.00294616	9606	Homo sapiens	Apc2;Anapc10		R-HSA-174144;R-HSA-174088;R-HSA-174157;R-HSA-179410;R-HSA-174227;R-HSA-188371;R-HSA-174224;R-HSA-9686980;R-HSA-174171;R-HSA-174104;R-HSA-174105;R-HSA-179417;R-HSA-174238;R-HSA-188191;R-HSA-179421;R-HSA-174119;R-HSA-174058;R-HSA-9686969;R-HSA-174120;R-HSA-174057;R-HSA-174121;R-HSA-174255;R-HSA-141423;R-HSA-174195;R-HSA-174070;R-HSA-174132;R-HSA-174202;R-HSA-174139;R-HSA-174079
R-HSA-2565942	Regulation of PLK1 Activity at G2/M Transition	2	92	0.00644664	0.991069	0.991069	5	12	0.000883848	9606	Homo sapiens	Ninl;Ppp1r12b		R-HSA-3000319;R-HSA-3002811;R-HSA-2574845;R-HSA-3000310;R-HSA-2574840
R-HSA-5621480	Dectin-2 family	1	65	0.00455469	0.991601	0.991601	5	12	0.000883848	9606	Homo sapiens	Syk		R-HSA-5621366;R-HSA-5621347;R-HSA-5621363;R-HSA-5621356;R-HSA-5621370
R-HSA-2980766	Nuclear Envelope Breakdown	1	65	0.00455469	0.991601	0.991601	1	13	0.000957502	9606	Homo sapiens	Vrk2		R-HSA-2993898
R-HSA-69052	Switching of origins to a post-replicative state	2	93	0.00651671	0.991625	0.991625	1	9	0.000662886	9606	Homo sapiens	Apc2;Anapc10		R-HSA-69015
R-HSA-1614635	Sulfur amino acid metabolism	2	93	0.00651671	0.991625	0.991625	3	37	0.0027252	9606	Homo sapiens	Tst;Suox		R-HSA-1614618;R-HSA-9013198;R-HSA-1614544
R-HSA-9678108	SARS-CoV-1 Infection	2	93	0.00651671	0.991625	0.991625	1	111	0.00817559	9606	Homo sapiens	Chmp4c		R-HSA-9687435
R-HSA-8951664	Neddylation	9	241	0.0168874	0.991894	0.991894	14	31	0.00228327	9606	Homo sapiens	Spsb2;Fbxl22;Ankrd9;Gan;Ifngr1;Fbxo17;Nae1;Asb16;Kbtbd8		R-HSA-8956040;R-HSA-8956200;R-HSA-8951656;R-HSA-8955241;R-HSA-8952618;R-HSA-8952044;R-HSA-8952620;R-HSA-8951661;R-HSA-8951648;R-HSA-8952039;R-HSA-8951751;R-HSA-8955289;R-HSA-8951764;R-HSA-8951766
R-HSA-166058	MyD88:MAL(TIRAP) cascade initiated on plasma membrane	3	118	0.00826852	0.991983	0.991983	20	64	0.00471385	9606	Homo sapiens	Mal;S100a9;Map2k6		R-HSA-166082;R-HSA-2201316;R-HSA-166119;R-HSA-2559456;R-HSA-166091;R-HSA-2201322;R-HSA-450346;R-HSA-166286;R-HSA-937059;R-HSA-166284;R-HSA-937022;R-HSA-2559414;R-HSA-2262775;R-HSA-166362;R-HSA-937079;R-HSA-166363;R-HSA-166072;R-HSA-450333;R-HSA-2262777;R-HSA-450296
R-HSA-168188	Toll Like Receptor TLR6:TLR2 Cascade	3	118	0.00826852	0.991983	0.991983	20	66	0.00486116	9606	Homo sapiens	Mal;S100a9;Map2k6		R-HSA-166082;R-HSA-2201316;R-HSA-166119;R-HSA-2559456;R-HSA-166091;R-HSA-2201322;R-HSA-450346;R-HSA-166286;R-HSA-937059;R-HSA-166284;R-HSA-937022;R-HSA-2559414;R-HSA-2262775;R-HSA-166362;R-HSA-937079;R-HSA-166363;R-HSA-166072;R-HSA-450333;R-HSA-2262777;R-HSA-450296
R-HSA-5419276	Mitochondrial translation termination	2	94	0.00658678	0.992148	0.992148	5	5	0.00036827	9606	Homo sapiens	Mrpl13;Mrps36		R-HSA-5419264;R-HSA-5419281;R-HSA-5419271;R-HSA-5419273;R-HSA-5419277
R-HSA-5389840	Mitochondrial translation elongation	2	94	0.00658678	0.992148	0.992148	5	8	0.000589232	9606	Homo sapiens	Mrpl13;Mrps36		R-HSA-5389842;R-HSA-5389857;R-HSA-5389848;R-HSA-5419279;R-HSA-5419261
R-HSA-5621481	C-type lectin receptors (CLRs)	7	203	0.0142247	0.992158	0.992158	17	68	0.00500847	9606	Homo sapiens	Pycard;Syk;Cd209a;Ccl17;Pak3;Itpr3		R-HSA-5660662;R-HSA-5660663;R-HSA-5621366;R-HSA-5621363;R-HSA-5621370;R-HSA-5607738;R-HSA-5621573;R-HSA-169683;R-HSA-169680;R-HSA-5621606;R-HSA-5660965;R-HSA-5607745;R-HSA-5621347;R-HSA-5621571;R-HSA-5621356;R-HSA-5624492;R-HSA-5621615
R-HSA-9664323	FCGR3A-mediated IL10 synthesis	4	141	0.00988018	0.992193	0.992193	10	20	0.00147308	9606	Homo sapiens	Fcgr3;Syk;Adcy2;Itpr3		R-HSA-9664275;R-HSA-169683;R-HSA-9664273;R-HSA-169680;R-HSA-9664278;R-HSA-9664261;R-HSA-111930;R-HSA-9664271;R-HSA-9664270;R-HSA-9664268
R-HSA-194441	Metabolism of non-coding RNA	1	66	0.00462476	0.992198	0.992198	5	6	0.000441924	9606	Homo sapiens	Snrpf		R-HSA-191763;R-HSA-191830;R-HSA-191786;R-HSA-191784;R-HSA-191790
R-HSA-191859	snRNP Assembly	1	66	0.00462476	0.992198	0.992198	5	6	0.000441924	9606	Homo sapiens	Snrpf		R-HSA-191763;R-HSA-191830;R-HSA-191786;R-HSA-191784;R-HSA-191790
R-HSA-9658195	Leishmania infection	18	406	0.0284493	0.992634	0.992634	28	95	0.00699713	9606	Homo sapiens	Adora2a;Pycard;Gngt2;Fcgr3;Syk;Mefv;Vipr2;Gpr25;Ptgir;Vipr1;Ptger2;44808;Elmo1;Adcy2;Ggt1;Itpr3;Pthlh		R-HSA-9664275;R-HSA-9660819;R-HSA-9664273;R-HSA-392129;R-HSA-9664278;R-HSA-9664406;R-HSA-844612;R-HSA-9666458;R-HSA-9660824;R-HSA-844610;R-HSA-9660828;R-HSA-9666435;R-HSA-169683;R-HSA-169680;R-HSA-9664261;R-HSA-9664271;R-HSA-9664270;R-HSA-9664268;R-HSA-9664306;R-HSA-163617;R-HSA-9666426;R-HSA-9666425;R-HSA-9666430;R-HSA-9666428;R-HSA-879221;R-HSA-266046;R-HSA-111930;R-HSA-877361
R-HSA-6804756	Regulation of TP53 Activity through Phosphorylation	2	95	0.00665686	0.992639	0.992639	4	26	0.001915	9606	Homo sapiens	Dyrk3;Trp53inp1		R-HSA-6798374;R-HSA-3215251;R-HSA-6798372;R-HSA-6799409
R-HSA-186712	Regulation of beta-cell development	1	67	0.00469484	0.992752	0.992752	2	26	0.001915	9606	Homo sapiens	Mafa		R-HSA-211289;R-HSA-211272
R-HSA-5368286	Mitochondrial translation initiation	2	96	0.00672693	0.9931	0.9931	3	4	0.000294616	9606	Homo sapiens	Mrpl13;Mrps36		R-HSA-5368279;R-HSA-5389849;R-HSA-5389839
R-HSA-447115	Interleukin-12 family signaling	2	96	0.00672693	0.9931	0.9931	21	114	0.00839655	9606	Homo sapiens	Il27;Il27ra		R-HSA-8950504;R-HSA-8950441;R-HSA-8950537;R-HSA-8950731;R-HSA-448421;R-HSA-8984012;R-HSA-8950766;R-HSA-8984014;R-HSA-8984001;R-HSA-8950210;R-HSA-8950340;R-HSA-448427;R-HSA-8950342;R-HSA-8950716;R-HSA-8950398;R-HSA-8950271;R-HSA-8950674;R-HSA-8984021;R-HSA-8950485;R-HSA-8950518;R-HSA-8984023
R-HSA-390466	Chaperonin-mediated protein folding	2	96	0.00672693	0.9931	0.9931	3	19	0.00139943	9606	Homo sapiens	Gngt2;Tst		R-HSA-390470;R-HSA-6814418;R-HSA-8850560
R-HSA-425393	Transport of inorganic cations/anions and amino acids/oligopeptides	5	165	0.0115619	0.99317	0.99317	5	75	0.00552405	9606	Homo sapiens	Slc9a4;Nat2;Slc24a5;Slc17a8;Slc7a1		R-HSA-428052;R-HSA-352119;R-HSA-375776;R-HSA-5626316;R-HSA-425994
R-HSA-909733	Interferon alpha/beta signaling	6	186	0.0130334	0.993248	0.993248	2	22	0.00162039	9606	Homo sapiens	Oas2;Irf5;Irf6		R-HSA-1015702;R-HSA-1015699
R-HSA-2894862	Constitutive Signaling by NOTCH1 HD+PEST Domain Mutants	1	68	0.00476491	0.993267	0.993267	1	21	0.00154673	9606	Homo sapiens	Hdac6		R-HSA-2220982
R-HSA-2644606	Constitutive Signaling by NOTCH1 PEST Domain Mutants	1	68	0.00476491	0.993267	0.993267	1	21	0.00154673	9606	Homo sapiens	Hdac6		R-HSA-2220982
R-HSA-2644602	Signaling by NOTCH1 PEST Domain Mutants in Cancer	1	68	0.00476491	0.993267	0.993267	1	21	0.00154673	9606	Homo sapiens	Hdac6		R-HSA-2220982
R-HSA-2894858	Signaling by NOTCH1 HD+PEST Domain Mutants in Cancer	1	68	0.00476491	0.993267	0.993267	1	21	0.00154673	9606	Homo sapiens	Hdac6		R-HSA-2220982
R-HSA-2644603	Signaling by NOTCH1 in Cancer	1	68	0.00476491	0.993267	0.993267	1	39	0.0028725	9606	Homo sapiens	Hdac6		R-HSA-2220982
R-HSA-379724	tRNA Aminoacylation	1	68	0.00476491	0.993267	0.993267	1	42	0.00309347	9606	Homo sapiens	Wars		R-HSA-379977
R-HSA-168179	Toll Like Receptor TLR1:TLR2 Cascade	3	121	0.00847873	0.993283	0.993283	20	66	0.00486116	9606	Homo sapiens	Mal;S100a9;Map2k6		R-HSA-166082;R-HSA-2201316;R-HSA-166119;R-HSA-2559456;R-HSA-166091;R-HSA-2201322;R-HSA-450346;R-HSA-166286;R-HSA-937059;R-HSA-166284;R-HSA-937022;R-HSA-2559414;R-HSA-2262775;R-HSA-166362;R-HSA-937079;R-HSA-166363;R-HSA-166072;R-HSA-450333;R-HSA-2262777;R-HSA-450296
R-HSA-181438	Toll Like Receptor 2 (TLR2) Cascade	3	121	0.00847873	0.993283	0.993283	20	68	0.00500847	9606	Homo sapiens	Mal;S100a9;Map2k6		R-HSA-166082;R-HSA-2201316;R-HSA-166119;R-HSA-2559456;R-HSA-166091;R-HSA-2201322;R-HSA-450346;R-HSA-166286;R-HSA-937059;R-HSA-166284;R-HSA-937022;R-HSA-2559414;R-HSA-2262775;R-HSA-166362;R-HSA-937079;R-HSA-166363;R-HSA-166072;R-HSA-450333;R-HSA-2262777;R-HSA-450296
R-HSA-5668914	Diseases of metabolism	18	409	0.0286595	0.99337	0.99337	26	190	0.0139943	9606	Homo sapiens	Tbxas1;Hexa;Mmab;Dag1;Thsd7a;Cfp;Cyp26b1;Csf2rb;Tcn2;Adamts10;44808;Sbspon;Neu1;Notch3;Fdxr;Ggt1;Fmod;Oplah		R-HSA-9035976;R-HSA-9035978;R-HSA-5615556;R-HSA-3656230;R-HSA-5688899;R-HSA-5096538;R-HSA-3325546;R-HSA-5602063;R-HSA-5617096;R-HSA-5603208;R-HSA-5603275;R-HSA-5615604;R-HSA-5688884;R-HSA-9035949;R-HSA-5603251;R-HSA-4341669;R-HSA-9035950;R-HSA-3656259;R-HSA-3656258;R-HSA-9035966;R-HSA-5580269;R-HSA-6785565;R-HSA-3656269;R-HSA-3299657;R-HSA-5602984;R-HSA-3322125
R-HSA-9612973	Autophagy	5	166	0.011632	0.993516	0.993516	26	108	0.00795463	9606	Homo sapiens	Chmp4c;Atg4c;Plin2;Hdac6		R-HSA-9646354;R-HSA-5682388;R-HSA-9646679;R-HSA-9613530;R-HSA-9631065;R-HSA-9624158;R-HSA-9646685;R-HSA-9631068;R-HSA-5681987;R-HSA-9646347;R-HSA-9613513;R-HSA-9626060;R-HSA-9646348;R-HSA-5682377;R-HSA-9646390;R-HSA-9622840;R-HSA-9613565;R-HSA-9613666;R-HSA-9625188;R-HSA-9620197;R-HSA-9613352;R-HSA-9615721;R-HSA-9646383;R-HSA-9622831;R-HSA-9625196;R-HSA-9625197
R-HSA-166520	Signaling by NTRKs	5	166	0.011632	0.993516	0.993516	11	164	0.0120793	9606	Homo sapiens	Adora2a;Sh3gl3;Id4;Pik3r1		R-HSA-9028505;R-HSA-9612534;R-HSA-9613476;R-HSA-9603445;R-HSA-198315;R-HSA-198266;R-HSA-9619838;R-HSA-9613023;R-HSA-9603407;R-HSA-9028519;R-HSA-187661
R-HSA-180786	Extension of Telomeres	1	69	0.00483498	0.993746	0.993746	23	28	0.00206231	9606	Homo sapiens	Trf		R-HSA-174438;R-HSA-174439;R-HSA-9668597;R-HSA-9686521;R-HSA-174441;R-HSA-164617;R-HSA-174446;R-HSA-174447;R-HSA-174444;R-HSA-164620;R-HSA-174445;R-HSA-9686524;R-HSA-163090;R-HSA-174451;R-HSA-174448;R-HSA-163120;R-HSA-174452;R-HSA-163099;R-HSA-174427;R-HSA-174456;R-HSA-163096;R-HSA-174425;R-HSA-176702
R-HSA-450294	MAP kinase activation	1	69	0.00483498	0.993746	0.993746	3	32	0.00235693	9606	Homo sapiens	Map2k6		R-HSA-450333;R-HSA-450346;R-HSA-450296
R-HSA-1268020	Mitochondrial protein import	1	69	0.00483498	0.993746	0.993746	1	14	0.00103116	9606	Homo sapiens	Mtcp1		R-HSA-1307802
R-HSA-1474165	Reproduction	3	123	0.00861888	0.994034	0.994034	8	24	0.0017677	9606	Homo sapiens	Hist1h2ac;Hist1h4i;Trf		R-HSA-912408;R-HSA-912458;R-HSA-912503;R-HSA-912470;R-HSA-912496;R-HSA-1214188;R-HSA-912467;R-HSA-912450
R-HSA-6803157	Antimicrobial peptides	3	123	0.00861888	0.994034	0.994034	5	58	0.00427193	9606	Homo sapiens	Prtn3;Lbp;S100a9		R-HSA-6801687;R-HSA-6807585;R-HSA-6798528;R-HSA-6813659;R-HSA-6798474
R-HSA-9707616	Heme signaling	1	70	0.00490505	0.99419	0.99419	10	25	0.00184135	9606	Homo sapiens	Ubxn6		R-HSA-400342;R-HSA-1368069;R-HSA-5663271;R-HSA-1368119;R-HSA-1368065;R-HSA-5663265;R-HSA-1368140;R-HSA-5663245;R-HSA-549475;R-HSA-5663258
R-HSA-186797	Signaling by PDGF	1	70	0.00490505	0.99419	0.99419	2	31	0.00228327	9606	Homo sapiens	Pik3r1		R-HSA-186800;R-HSA-186780
R-HSA-199991	Membrane Trafficking	33	667	0.0467381	0.994346	0.994346	76	219	0.0161302	9606	Homo sapiens	Hip1;Cyth2;Ctsc;Galnt2;Sec22c;Dab2;Sec24d;Klc3;Dennd4a;Epgn;Chmp4c;Usp6nl;Acp1;Rab31;Ap1m2;Tfrc;Sh3gl3;Ap1s2;Ank3;Kif1a;Rab8b;Tpd52l1;Rab6b;F5;Btc;Scarb2;Rinl;Sort1;Ldlr;Rin1		R-HSA-8868230;R-HSA-5694423;R-HSA-5694421;R-HSA-5694418;R-HSA-5694417;R-HSA-5694431;R-HSA-5694428;R-HSA-8868236;R-HSA-8847883;R-HSA-5694425;R-HSA-8847880;R-HSA-8854303;R-HSA-8876190;R-HSA-8876188;R-HSA-5694413;R-HSA-8871194;R-HSA-8871193;R-HSA-5694409;R-HSA-8854182;R-HSA-6807877;R-HSA-6807875;R-HSA-8876193;R-HSA-8847534;R-HSA-8867756;R-HSA-8868651;R-HSA-8867754;R-HSA-8868648;R-HSA-5694439;R-HSA-8…
R-HSA-380284	Loss of proteins required for interphase microtubule organization from the centrosome	1	71	0.00497512	0.994603	0.994603	3	3	0.000220962	9606	Homo sapiens	Ninl		R-HSA-380294;R-HSA-380272;R-HSA-380303
R-HSA-380259	Loss of Nlp from mitotic centrosomes	1	71	0.00497512	0.994603	0.994603	2	2	0.000147308	9606	Homo sapiens	Ninl		R-HSA-380272;R-HSA-380303
R-HSA-9609507	Protein localization	5	170	0.0119123	0.994741	0.994741	7	53	0.00390366	9606	Homo sapiens	Abcd2;Nudt19;Acot1;Mtcp1		R-HSA-9033233;R-HSA-1307802;R-HSA-9033235;R-HSA-9603784;R-HSA-9033236;R-HSA-9603775;R-HSA-9603804
R-HSA-5685942	HDR through Homologous Recombination (HRR)	1	72	0.0050452	0.994987	0.994987	12	19	0.00139943	9606	Homo sapiens	Rad51b		R-HSA-5685318;R-HSA-5693620;R-HSA-5693589;R-HSA-5686469;R-HSA-5686483;R-HSA-5693539;R-HSA-5693584;R-HSA-5685838;R-HSA-5685341;R-HSA-5686410;R-HSA-5686440;R-HSA-5693593
R-HSA-3371497	HSP90 chaperone cycle for steroid hormone receptors (SHR) in the presence of ligand	1	72	0.0050452	0.994987	0.994987	1	16	0.00117846	9606	Homo sapiens	Acp1		R-HSA-5618080
R-HSA-975138	TRAF6 mediated induction of NFkB and MAP kinases upon TLR7/8 or 9 activation	2	101	0.00707729	0.995011	0.995011	4	48	0.00353539	9606	Homo sapiens	Tlr7;Map2k6		R-HSA-975100;R-HSA-450333;R-HSA-450346;R-HSA-450296
R-HSA-5368287	Mitochondrial translation	2	102	0.00714736	0.995326	0.995326	13	17	0.00125212	9606	Homo sapiens	Mrpl13;Mrps36		R-HSA-5389842;R-HSA-5419281;R-HSA-5368279;R-HSA-5389848;R-HSA-5389849;R-HSA-5419261;R-HSA-5419264;R-HSA-5389857;R-HSA-5419271;R-HSA-5419273;R-HSA-5419279;R-HSA-5389839;R-HSA-5419277
R-HSA-975155	MyD88 dependent cascade initiated on endosome	2	102	0.00714736	0.995326	0.995326	17	63	0.0046402	9606	Homo sapiens	Tlr7;Map2k6		R-HSA-975118;R-HSA-975180;R-HSA-975115;R-HSA-975111;R-HSA-975175;R-HSA-450346;R-HSA-975106;R-HSA-975170;R-HSA-975134;R-HSA-975100;R-HSA-975098;R-HSA-975160;R-HSA-975188;R-HSA-975156;R-HSA-450333;R-HSA-975125;R-HSA-450296
R-HSA-68867	Assembly of the pre-replicative complex	2	102	0.00714736	0.995326	0.995326	2	18	0.00132577	9606	Homo sapiens	Hist1h2ac;Hist1h4i		R-HSA-9749197;R-HSA-9749098
R-HSA-391251	Protein folding	2	102	0.00714736	0.995326	0.995326	3	28	0.00206231	9606	Homo sapiens	Gngt2;Tst		R-HSA-390470;R-HSA-6814418;R-HSA-8850560
R-HSA-2029481	FCGR activation	2	103	0.00721743	0.995621	0.995621	4	6	0.000441924	9606	Homo sapiens	Fcgr3;Syk		R-HSA-2029452;R-HSA-2029449;R-HSA-2029459;R-HSA-2029457
R-HSA-8854518	AURKA Activation by TPX2	1	74	0.00518534	0.995674	0.995674	2	2	0.000147308	9606	Homo sapiens	Ninl		R-HSA-8853405;R-HSA-8853419
R-HSA-201681	TCF dependent signaling in response to WNT	7	216	0.0151356	0.995785	0.995785	13	71	0.00522943	9606	Homo sapiens	Hist1h2ac;Sfrp2;Tle2;Hist1h4i;Sox9;Wnt4;Dkk2		R-HSA-3769401;R-HSA-3772441;R-HSA-3769370;R-HSA-3299569;R-HSA-3361751;R-HSA-3364026;R-HSA-1458875;R-HSA-3322431;R-HSA-5626938;R-HSA-3322429;R-HSA-3322434;R-HSA-5368586;R-HSA-3451147
R-HSA-2871809	FCERI mediated Ca+2 mobilization	3	129	0.00903931	0.99583	0.99583	4	11	0.000810194	9606	Homo sapiens	Syk;Itpr3;Ms4a2		R-HSA-2730888;R-HSA-169683;R-HSA-169680;R-HSA-2730833
R-HSA-5693538	Homology Directed Repair	3	130	0.00910938	0.996073	0.996073	17	50	0.0036827	9606	Homo sapiens	Rad51b;Hist1h4i;Parp2		R-HSA-5693620;R-HSA-5684052;R-HSA-5693589;R-HSA-5686483;R-HSA-5693584;R-HSA-5687484;R-HSA-5685341;R-HSA-5687640;R-HSA-5693593;R-HSA-5685318;R-HSA-5684071;R-HSA-5686469;R-HSA-5687653;R-HSA-5693539;R-HSA-5685838;R-HSA-5686410;R-HSA-5686440
R-HSA-983168	Antigen processing: Ubiquitination & Proteasome degradation	12	315	0.0220727	0.996138	0.996138	4	9	0.000662886	9606	Homo sapiens	Fbxl22;Spsb2;Apc2;Lonrf1;Anapc10;Ubox5;Gan;Ifngr1;Fbxo17;Asb16;Lnx1;Kbtbd8		R-HSA-983147;R-HSA-983157;R-HSA-983156;R-HSA-983140
R-HSA-77289	Mitochondrial Fatty Acid Beta-Oxidation	2	105	0.00735758	0.996157	0.996157	2	47	0.00346174	9606	Homo sapiens	Acot1		R-HSA-5690066;R-HSA-5690043
R-HSA-9711097	Cellular response to starvation	5	176	0.0123327	0.996172	0.996172	12	28	0.00206231	9606	Homo sapiens	Rps16;Tcirg1;Atp6v0c;Atp6v0d2;Atp6v0e2		R-HSA-9640195;R-HSA-9633008;R-HSA-9640167;R-HSA-9639286;R-HSA-9646468;R-HSA-9640168;R-HSA-9645608;R-HSA-9640175;R-HSA-9633742;R-HSA-9645598;R-HSA-9634669;R-HSA-9633005
R-HSA-948021	Transport to the Golgi and subsequent modification	7	219	0.0153458	0.996358	0.996358	23	60	0.00441924	9606	Homo sapiens	Ctsc;Ank3;Mgat3;Acp1;Sec22c;Sec24d;F5		R-HSA-5694423;R-HSA-6807877;R-HSA-5694421;R-HSA-5694418;R-HSA-6807875;R-HSA-203973;R-HSA-5694417;R-HSA-5694431;R-HSA-5694527;R-HSA-6809006;R-HSA-5694428;R-HSA-204008;R-HSA-5694522;R-HSA-6809003;R-HSA-5694425;R-HSA-5694439;R-HSA-6809011;R-HSA-6809010;R-HSA-5694446;R-HSA-975926;R-HSA-5694413;R-HSA-5694441;R-HSA-5694409
R-HSA-157118	Signaling by NOTCH	9	259	0.0181487	0.996362	0.996362	65	154	0.0113427	9606	Homo sapiens	Hist1h2ac;Tle2;Hist1h4i;Notch3;Pofut1;Dtx4;Hdac6		R-HSA-1912349;R-HSA-9021451;R-HSA-9021450;R-HSA-9021325;R-HSA-9016861;R-HSA-9013652;R-HSA-9021480;R-HSA-1912382;R-HSA-9018538;R-HSA-1912379;R-HSA-9016751;R-HSA-9018542;R-HSA-1912378;R-HSA-1912372;R-HSA-1912374;R-HSA-1912369;R-HSA-9013284;R-HSA-157100;R-HSA-9021478;R-HSA-1912366;R-HSA-9013567;R-HSA-1912362;R-HSA-1912357;R-HSA-1912359;R-HSA-1912353;R-HSA-1912352;R-HSA-9021364;R-HSA-1912355;R-HSA-90…
R-HSA-168138	Toll Like Receptor 9 (TLR9) Cascade	2	106	0.00742765	0.996401	0.996401	17	68	0.00500847	9606	Homo sapiens	Tlr7;Map2k6		R-HSA-975118;R-HSA-975180;R-HSA-975115;R-HSA-975111;R-HSA-975175;R-HSA-450346;R-HSA-975106;R-HSA-975170;R-HSA-975134;R-HSA-975100;R-HSA-975098;R-HSA-975160;R-HSA-975188;R-HSA-975156;R-HSA-450333;R-HSA-975125;R-HSA-450296
R-HSA-8939236	RUNX1 regulates transcription of genes involved in differentiation of HSCs	2	106	0.00742765	0.996401	0.996401	3	15	0.00110481	9606	Homo sapiens	Hist1h2ac;Hist1h4i		R-HSA-8865491;R-HSA-8865505;R-HSA-8865498
R-HSA-5687128	MAPK6/MAPK4 signaling	2	106	0.00742765	0.996401	0.996401	7	40	0.00294616	9606	Homo sapiens	Pak3;Foxo3		R-HSA-5687126;R-HSA-5687095;R-HSA-5687086;R-HSA-389788;R-HSA-5687103;R-HSA-5627775;R-HSA-5687101
R-HSA-448424	Interleukin-17 signaling	1	77	0.00539556	0.996533	0.996533	3	35	0.00257789	9606	Homo sapiens	Map2k6		R-HSA-450333;R-HSA-450346;R-HSA-450296
R-HSA-6807878	COPI-mediated anterograde transport	2	107	0.00749772	0.996629	0.996629	6	12	0.000883848	9606	Homo sapiens	Ank3;Acp1		R-HSA-6807877;R-HSA-6809011;R-HSA-6807875;R-HSA-6809010;R-HSA-6809006;R-HSA-6809003
R-HSA-1834949	Cytosolic sensors of pathogen-associated DNA	1	78	0.00546563	0.996779	0.996779	6	50	0.0036827	9606	Homo sapiens	Dtx4		R-HSA-3249392;R-HSA-2396007;R-HSA-8948703;R-HSA-3249386;R-HSA-8948709;R-HSA-1606327
R-HSA-193368	Synthesis of bile acids and bile salts via 7alpha-hydroxycholesterol	1	78	0.00546563	0.996779	0.996779	1	39	0.0028725	9606	Homo sapiens	Ptgis		R-HSA-192157
R-HSA-388396	GPCR downstream signalling	39	786	0.0550767	0.996868	0.996868	71	168	0.0123739	9606	Homo sapiens	Adora2a;Opn1sw;Cxcr1;Cxcr2;C5ar1;Aplnr;Fpr2;Ccr10;Vipr2;Gpr25;Vipr1;Rgs2;Arhgef16;Pnp;Ptger2;P2ry2;Pde4d;Adcy2;Cxcl1;Ccr5;Dgke;Pthlh;Ngef;Cxcl5;Ccr1;Gngt2;Pmch;Cort;Ptgir;44808;Pde3b;Pde1a;F2rl1;Pik3r6;Pik3r1;Itpr3		R-HSA-8982025;R-HSA-167427;R-HSA-749448;R-HSA-8982026;R-HSA-749454;R-HSA-392064;R-HSA-426240;R-HSA-749453;R-HSA-749452;R-HSA-167429;R-HSA-750988;R-HSA-8982017;R-HSA-392206;R-HSA-167433;R-HSA-749446;R-HSA-112271;R-HSA-8964614;R-HSA-418582;R-HSA-8964634;R-HSA-751001;R-HSA-420883;R-HSA-8964241;R-HSA-750993;R-HSA-749456;R-HSA-751019;R-HSA-379044;R-HSA-163617;R-HSA-8964271;R-HSA-139941;R-HSA-170666;R-…
R-HSA-68875	Mitotic Prophase	3	135	0.00945974	0.997096	0.997096	9	34	0.00250424	9606	Homo sapiens	Hist1h2ac;Hist1h4i;Vrk2		R-HSA-2245218;R-HSA-2288097;R-HSA-2301205;R-HSA-2993898;R-HSA-2294580;R-HSA-2172678;R-HSA-2294600;R-HSA-2294574;R-HSA-2294590
R-HSA-1660661	Sphingolipid de novo biosynthesis	1	80	0.00560577	0.997221	0.997221	1	32	0.00235693	9606	Homo sapiens	Cers6		R-HSA-428185
R-HSA-1630316	Glycosaminoglycan metabolism	5	182	0.0127531	0.997225	0.997225	15	88	0.00648155	9606	Homo sapiens	Hexa;Csgalnact1;Hpse;B3gnt2;Fmod		R-HSA-2046239;R-HSA-2046175;R-HSA-2025724;R-HSA-1971482;R-HSA-1667005;R-HSA-2046298;R-HSA-2025723;R-HSA-2046265;R-HSA-2105001;R-HSA-2162225;R-HSA-2046222;R-HSA-2046285;R-HSA-1793217;R-HSA-2046180;R-HSA-1638053
R-HSA-9716542	Signaling by Rho GTPases, Miro GTPases and RHOBTB3	35	725	0.0508023	0.997286	0.997286	94	212	0.0156146	9606	Homo sapiens	Hist1h2ac;Spata13;Kctd3;Ncf1;Ophn1;Ncf4;Myh14;Dock2;Ppp1r12b;Cpne8;Klc3;Arhgef16;Rac2;Pak3;S100a9;Iqgap2;Ptpn13;Arhgap30;Pak4;Ngef;Dsp;Rtkn;Ccdc88b;Tfrc;Fam83b;Vrk2;Plxna1;Mylk;Sh3bp1;Farp2;Hist1h4i;Speg;Mal;Pik3r1;Myo19		R-HSA-5668947;R-HSA-9018766;R-HSA-5666001;R-HSA-5671772;R-HSA-8981637;R-HSA-9693214;R-HSA-419083;R-HSA-5666008;R-HSA-9018758;R-HSA-9013145;R-HSA-5625797;R-HSA-9014296;R-HSA-9014424;R-HSA-9013144;R-HSA-5625796;R-HSA-5668932;R-HSA-9626880;R-HSA-9714691;R-HSA-9013022;R-HSA-5665998;R-HSA-9013009;R-HSA-5665999;R-HSA-9696266;R-HSA-9017488;R-HSA-9014293;R-HSA-9696271;R-HSA-9014420;R-HSA-9693198;R-HSA-90…
R-HSA-194315	Signaling by Rho GTPases	34	709	0.0496812	0.997336	0.997336	92	203	0.0149518	9606	Homo sapiens	Hist1h2ac;Spata13;Kctd3;Ncf1;Ophn1;Ncf4;Myh14;Dock2;Ppp1r12b;Cpne8;Klc3;Arhgef16;Rac2;Pak3;S100a9;Iqgap2;Ptpn13;Arhgap30;Pak4;Ngef;Dsp;Rtkn;Ccdc88b;Tfrc;Fam83b;Vrk2;Plxna1;Mylk;Sh3bp1;Farp2;Hist1h4i;Speg;Mal;Pik3r1		R-HSA-5668947;R-HSA-9018766;R-HSA-5666001;R-HSA-5671772;R-HSA-8981637;R-HSA-9693214;R-HSA-419083;R-HSA-5666008;R-HSA-9018758;R-HSA-9013145;R-HSA-5625797;R-HSA-9014296;R-HSA-9014424;R-HSA-9013144;R-HSA-5625796;R-HSA-5668932;R-HSA-9626880;R-HSA-9714691;R-HSA-9013022;R-HSA-5665998;R-HSA-9013009;R-HSA-5665999;R-HSA-9696266;R-HSA-9017488;R-HSA-9014293;R-HSA-9696271;R-HSA-9014420;R-HSA-9693198;R-HSA-90…
R-HSA-69618	Mitotic Spindle Checkpoint	2	111	0.00777801	0.997408	0.997408	1	7	0.000515578	9606	Homo sapiens	Apc2;Anapc10		R-HSA-141423
R-HSA-380270	Recruitment of mitotic centrosome proteins and complexes	1	81	0.00567585	0.997419	0.997419	3	3	0.000220962	9606	Homo sapiens	Ninl		R-HSA-380311;R-HSA-380455;R-HSA-380283
R-HSA-69473	G2/M DNA damage checkpoint	1	81	0.00567585	0.997419	0.997419	2	12	0.000883848	9606	Homo sapiens	Hist1h4i		R-HSA-5683735;R-HSA-69891
R-HSA-3108214	SUMOylation of DNA damage response and repair proteins	1	81	0.00567585	0.997419	0.997419	2	24	0.0017677	9606	Homo sapiens	Tdg		R-HSA-4551648;R-HSA-4551738
R-HSA-9694516	SARS-CoV-2 Infection	2	112	0.00784808	0.997573	0.997573	1	116	0.00854386	9606	Homo sapiens	Chmp4c		R-HSA-9698265
R-HSA-73886	Chromosome Maintenance	3	138	0.00966996	0.997579	0.997579	31	38	0.00279885	9606	Homo sapiens	Hist1h2ac;Hist1h4i;Trf		R-HSA-606287;R-HSA-9670101;R-HSA-181450;R-HSA-164617;R-HSA-164620;R-HSA-163090;R-HSA-9670149;R-HSA-606289;R-HSA-163099;R-HSA-174427;R-HSA-163096;R-HSA-174425;R-HSA-174438;R-HSA-174439;R-HSA-9668597;R-HSA-9686521;R-HSA-174441;R-HSA-174446;R-HSA-174447;R-HSA-174444;R-HSA-174445;R-HSA-9686524;R-HSA-9670114;R-HSA-174451;R-HSA-174448;R-HSA-163120;R-HSA-174452;R-HSA-174456;R-HSA-176702;R-HSA-176700;R-H…
R-HSA-1226099	Signaling by FGFR in disease	1	82	0.00574592	0.997602	0.997602	21	106	0.00780732	9606	Homo sapiens	Pik3r1		R-HSA-1839102;R-HSA-5655252;R-HSA-8853316;R-HSA-5655285;R-HSA-5655315;R-HSA-5655248;R-HSA-5655263;R-HSA-5655290;R-HSA-8853323;R-HSA-5655323;R-HSA-5655320;R-HSA-1839091;R-HSA-5655289;R-HSA-1839080;R-HSA-5655235;R-HSA-1839114;R-HSA-1839078;R-HSA-5655245;R-HSA-8853308;R-HSA-5655240;R-HSA-1839107
R-HSA-71387	Metabolism of carbohydrates	19	456	0.0319529	0.997707	0.997707	29	243	0.0178979	9606	Homo sapiens	B3galt2;Slc37a2;Hexa;Slc37a1;Gnpda2;Pygl;Man2b1;B3gnt2;Cryl1;Aldoc;Fut1;Rhd;Fut7;Pkm;Csgalnact1;Hpse;Fmod		R-HSA-2046239;R-HSA-2046175;R-HSA-1971482;R-HSA-2046298;R-HSA-71495;R-HSA-9603989;R-HSA-2105001;R-HSA-71496;R-HSA-9038658;R-HSA-2162225;R-HSA-2046222;R-HSA-2046285;R-HSA-6799604;R-HSA-3257122;R-HSA-9033949;R-HSA-1793217;R-HSA-453339;R-HSA-9605682;R-HSA-2025724;R-HSA-1667005;R-HSA-71588;R-HSA-2025723;R-HSA-2046265;R-HSA-71590;R-HSA-8853686;R-HSA-71670;R-HSA-2046180;R-HSA-5661290;R-HSA-1638053
R-HSA-380287	Centrosome maturation	1	83	0.00581599	0.997773	0.997773	6	6	0.000441924	9606	Homo sapiens	Ninl		R-HSA-380311;R-HSA-380455;R-HSA-380294;R-HSA-380272;R-HSA-380303;R-HSA-380283
R-HSA-8852135	Protein ubiquitination	1	84	0.00588606	0.997931	0.997931	2	32	0.00235693	9606	Homo sapiens	Derl1		R-HSA-8943080;R-HSA-8943083
R-HSA-422475	Axon guidance	26	585	0.0409922	0.998158	0.998158	80	298	0.0219489	9606	Homo sapiens	Cacna1h;Rps16;Efna2;Nrp2;Myh14;Trpc1;Gfra1;Pak3;Pak4;Ngef;Itga10;Ablim2;Ablim3;Dag1;Scn8a;Ank3;Nrcam;Plxnc1;Plxna1;Epha3;Farp2;Dok2;Lama1;Tifa;Pik3r1		R-HSA-525833;R-HSA-443778;R-HSA-8853762;R-HSA-9010190;R-HSA-8853774;R-HSA-3928625;R-HSA-8855564;R-HSA-445067;R-HSA-3928628;R-HSA-445076;R-HSA-3928616;R-HSA-374675;R-HSA-8853789;R-HSA-3928602;R-HSA-3928607;R-HSA-445088;R-HSA-8853793;R-HSA-3928604;R-HSA-8853792;R-HSA-392751;R-HSA-434989;R-HSA-3928597;R-HSA-8853800;R-HSA-447030;R-HSA-9010872;R-HSA-4093327;R-HSA-3928584;R-HSA-3928591;R-HSA-418865;R-H…
R-HSA-446652	Interleukin-1 family signaling	4	167	0.0117021	0.998193	0.998193	4	80	0.00589232	9606	Homo sapiens	Il1f9;Map2k6;Ptpn13		R-HSA-727819;R-HSA-9008894;R-HSA-8848316;R-HSA-8848314
R-HSA-383280	Nuclear Receptor transcription pathway	1	86	0.00602621	0.998215	0.998215	2	2	0.000147308	9606	Homo sapiens	Ubxn6		R-HSA-382096;R-HSA-376419
R-HSA-5693532	DNA Double-Strand Break Repair	4	168	0.0117721	0.998294	0.998294	50	111	0.00817559	9606	Homo sapiens	Rad51b;Hist1h4i;Parp2;Kdm4b		R-HSA-5684052;R-HSA-69891;R-HSA-5686483;R-HSA-5685341;R-HSA-5683930;R-HSA-5687640;R-HSA-5683801;R-HSA-5685318;R-HSA-5686469;R-HSA-5682629;R-HSA-5685838;R-HSA-5683405;R-HSA-5686900;R-HSA-5693566;R-HSA-5683967;R-HSA-5683964;R-HSA-5684071;R-HSA-5687653;R-HSA-5693539;R-HSA-5693536;R-HSA-5683425;R-HSA-5693551;R-HSA-5693549;R-HSA-5683735;R-HSA-5682967;R-HSA-5693589;R-HSA-5682965;R-HSA-5683986;R-HSA-569…
R-HSA-2173782	Binding and Uptake of Ligands by Scavenger Receptors	4	168	0.0117721	0.998294	0.998294	5	33	0.00243058	9606	Homo sapiens	Hsph1;Ssc5d;Stab1;Scarf1		R-HSA-2247514;R-HSA-2247513;R-HSA-2197770;R-HSA-8878603;R-HSA-2197645
R-HSA-2142753	Arachidonic acid metabolism	4	168	0.0117721	0.998294	0.998294	7	77	0.00567136	9606	Homo sapiens	Ptgis;Tbxas1;Cyp4b1;Ggt1		R-HSA-2161792;R-HSA-2161745;R-HSA-76496;R-HSA-211873;R-HSA-76500;R-HSA-266046;R-HSA-2161613
R-HSA-5358351	Signaling by Hedgehog	4	168	0.0117721	0.998294	0.998294	7	82	0.00603963	9606	Homo sapiens	Notum;Gpr161;Syvn1;Adcy2		R-HSA-5610725;R-HSA-5610727;R-HSA-5362553;R-HSA-5362441;R-HSA-5362459;R-HSA-5635102;R-HSA-5362412
R-HSA-15869	Metabolism of nucleotides	8	256	0.0179385	0.998372	0.998372	13	141	0.0103852	9606	Homo sapiens	Tymp;Pnp;Gda;Gsr;Entpd7;Nt5m;Dctd		R-HSA-112033;R-HSA-8851494;R-HSA-71682;R-HSA-74242;R-HSA-112034;R-HSA-74372;R-HSA-112265;R-HSA-74249;R-HSA-74376;R-HSA-112266;R-HSA-109514;R-HSA-74255;R-HSA-73596
R-HSA-109581	Apoptosis	5	192	0.0134539	0.99839	0.99839	8	141	0.0103852	9606	Homo sapiens	Dsp;Bcl2;Pkp1;Bmf		R-HSA-114352;R-HSA-508163;R-HSA-139908;R-HSA-201636;R-HSA-139909;R-HSA-201595;R-HSA-139897;R-HSA-6790025
R-HSA-2151201	Transcriptional activation of mitochondrial biogenesis	1	88	0.00616635	0.99846	0.99846	1	32	0.00235693	9606	Homo sapiens	Ubxn6		R-HSA-1368140
R-HSA-1638091	Heparan sulfate/heparin (HS-GAG) metabolism	1	88	0.00616635	0.99846	0.99846	1	33	0.00243058	9606	Homo sapiens	Hpse		R-HSA-1667005
R-HSA-2029480	Fcgamma receptor (FCGR) dependent phagocytosis	5	193	0.0135239	0.998476	0.998476	17	42	0.00309347	9606	Homo sapiens	Fcgr3;Syk;Elmo1;Pik3r1;Itpr3		R-HSA-2197697;R-HSA-2029467;R-HSA-2029272;R-HSA-2029273;R-HSA-2029270;R-HSA-2029271;R-HSA-2029268;R-HSA-2029458;R-HSA-2029459;R-HSA-2029457;R-HSA-169683;R-HSA-2029452;R-HSA-169680;R-HSA-2029453;R-HSA-2029451;R-HSA-2029449;R-HSA-2029476
R-HSA-211945	Phase I - Functionalization of compounds	10	299	0.0209516	0.998562	0.998562	32	98	0.00721809	9606	Homo sapiens	Ptgis;Cyp26b1;Tbxas1;Cmbl;44808;Ephx1;Cyp2s1;Ahrr;Cyp4b1;Fdxr		R-HSA-76416;R-HSA-76354;R-HSA-211910;R-HSA-193997;R-HSA-193101;R-HSA-76496;R-HSA-76434;R-HSA-211991;R-HSA-76500;R-HSA-211924;R-HSA-211988;R-HSA-211929;R-HSA-8936851;R-HSA-192157;R-HSA-211874;R-HSA-211873;R-HSA-212007;R-HSA-215526;R-HSA-212005;R-HSA-212004;R-HSA-6786190;R-HSA-5694077;R-HSA-211951;R-HSA-76397;R-HSA-5692283;R-HSA-143468;R-HSA-193709;R-HSA-76466;R-HSA-193845;R-HSA-211962;R-HSA-76472;…
R-HSA-72706	GTP hydrolysis and joining of the 60S ribosomal subunit	2	120	0.00840866	0.998571	0.998571	3	3	0.000220962	9606	Homo sapiens	Rps16;Eif4a2		R-HSA-72672;R-HSA-72619;R-HSA-72671
R-HSA-156827	L13a-mediated translational silencing of Ceruloplasmin expression	2	120	0.00840866	0.998571	0.998571	1	3	0.000220962	9606	Homo sapiens	Rps16;Eif4a2		R-HSA-156823
R-HSA-166663	Initial triggering of complement	2	120	0.00840866	0.998571	0.998571	5	21	0.00154673	9606	Homo sapiens	C4b;Cfp		R-HSA-166753;R-HSA-174551;R-HSA-173754;R-HSA-166795;R-HSA-981713
R-HSA-69002	DNA Replication Pre-Initiation	2	120	0.00840866	0.998571	0.998571	2	27	0.00198866	9606	Homo sapiens	Hist1h2ac;Hist1h4i		R-HSA-9749197;R-HSA-9749098
R-HSA-5357801	Programmed Cell Death	7	238	0.0166772	0.998587	0.998587	9	197	0.0145098	9606	Homo sapiens	Dsp;Chmp4c;Bcl2;Pkp1;Bmf		R-HSA-9647619;R-HSA-114352;R-HSA-508163;R-HSA-139908;R-HSA-201636;R-HSA-139909;R-HSA-201595;R-HSA-139897;R-HSA-6790025
R-HSA-1280215	Cytokine Signaling in Immune system	56	1092	0.0765188	0.99865	0.99865	137	708	0.052147	9606	Homo sapiens	Prtn3;Map2k6;Csf2rb;Tnfrsf11b;Tnfrsf11a;Il1f9;Ifngr1;Tnfrsf13b;Lbp;Cxcl1;Ccr5;Foxo3;Ptpn13;Ccr1;Cd86;Tnfsf4;Syk;Cd80;Tnfrsf25;F13a1;Il27;Il27ra;Lama5;Vcam1;Oas2;44808;Itgb2;Eif4a2;Tifa;Icam1;Bcl2;Eda2r;Irf5;Tnfrsf19;Irf6;Pik3r1;Csf3		R-HSA-727819;R-HSA-6785895;R-HSA-5693012;R-HSA-914182;R-HSA-6785898;R-HSA-8950674;R-HSA-450333;R-HSA-913424;R-HSA-879917;R-HSA-8950441;R-HSA-6786114;R-HSA-913451;R-HSA-879909;R-HSA-879910;R-HSA-1031716;R-HSA-450346;R-HSA-879907;R-HSA-1031713;R-HSA-8937656;R-HSA-5668454;R-HSA-879934;R-HSA-8950716;R-HSA-879930;R-HSA-879925;R-HSA-8848316;R-HSA-8848314;R-HSA-8937654;R-HSA-8950731;R-HSA-8984012;R-HSA-…
R-HSA-5693607	Processing of DNA double-strand break ends	1	90	0.0063065	0.998672	0.998672	2	17	0.00125212	9606	Homo sapiens	Hist1h4i		R-HSA-5684071;R-HSA-5684052
R-HSA-195253	Degradation of beta-catenin by the destruction complex	1	91	0.00637657	0.998766	0.998766	5	23	0.00169404	9606	Homo sapiens	Tle2		R-HSA-4649028;R-HSA-8944349;R-HSA-4641231;R-HSA-5229348;R-HSA-4641229
R-HSA-69306	DNA Replication	4	174	0.0121926	0.998795	0.998795	3	53	0.00390366	9606	Homo sapiens	Hist1h2ac;Apc2;Anapc10;Hist1h4i		R-HSA-69015;R-HSA-9749197;R-HSA-9749098
R-HSA-156580	Phase II - Conjugation of compounds	8	263	0.018429	0.998845	0.998845	14	72	0.00530309	9606	Homo sapiens	Sult1a1;Nat2;Chac1;Ggt1;Oplah		R-HSA-158849;R-HSA-176646;R-HSA-158468;R-HSA-8943279;R-HSA-176585;R-HSA-1247935;R-HSA-174959;R-HSA-158860;R-HSA-6785928;R-HSA-174963;R-HSA-158832;R-HSA-174967;R-HSA-176474;R-HSA-176669
R-HSA-5696399	Global Genome Nucleotide Excision Repair (GG-NER)	1	92	0.00644664	0.998854	0.998854	13	20	0.00147308	9606	Homo sapiens	Parp2		R-HSA-5690996;R-HSA-5696670;R-HSA-5696664;R-HSA-5691000;R-HSA-6790487;R-HSA-6790454;R-HSA-5690213;R-HSA-5689317;R-HSA-5689861;R-HSA-5690990;R-HSA-5696655;R-HSA-5690991;R-HSA-5690988
R-HSA-5632684	Hedgehog 'on' state	1	92	0.00644664	0.998854	0.998854	1	37	0.0027252	9606	Homo sapiens	Gpr161		R-HSA-5635102
R-HSA-9610379	HCMV Late Events	4	175	0.0122626	0.998864	0.998864	3	19	0.00139943	9606	Homo sapiens	Hist1h2ac;Hist1h4i;Chmp4c		R-HSA-9698928;R-HSA-9610954;R-HSA-9610942
R-HSA-416476	G alpha (q) signalling events	9	284	0.0199005	0.998869	0.998869	12	35	0.00257789	9606	Homo sapiens	Gngt2;Rgs2;Pmch;P2ry2;F2rl1;Fpr2;Pik3r1;Dgke;Itpr3		R-HSA-8982025;R-HSA-416358;R-HSA-418582;R-HSA-749448;R-HSA-8982026;R-HSA-426240;R-HSA-749452;R-HSA-139941;R-HSA-8982017;R-HSA-750993;R-HSA-139854;R-HSA-379048
R-HSA-9709957	Sensory Perception	20	493	0.0345456	0.998878	0.998878	35	139	0.0102379	9606	Homo sapiens	Apc2;Dhrs3;Opn1sw;Rdh11;Myo3b;Cngb1;Lrp8;Eps8l2;Espn;Tmie;Pde6g;Cib2;Rbp1;Ldlr;Acp1;Camkmt;Slc17a8;Itpr3		R-HSA-2466085;R-HSA-9662096;R-HSA-975629;R-HSA-2404131;R-HSA-2404140;R-HSA-2404142;R-HSA-9717214;R-HSA-74059;R-HSA-9717215;R-HSA-3229181;R-HSA-2423785;R-HSA-2404137;R-HSA-9663363;R-HSA-74065;R-HSA-2584246;R-HSA-9712199;R-HSA-2464822;R-HSA-2404144;R-HSA-2514867;R-HSA-2514865;R-HSA-2465917;R-HSA-2424254;R-HSA-74843;R-HSA-2395768;R-HSA-9659380;R-HSA-9656891;R-HSA-9712190;R-HSA-2395784;R-HSA-2429643;…
R-HSA-162906	HIV Infection	8	264	0.0184991	0.998901	0.998901	12	160	0.0117846	9606	Homo sapiens	Ap1m2;Ap1s2;Chmp4c;Elmo1;Ccr5;Dock2		R-HSA-3159232;R-HSA-164515;R-HSA-182279;R-HSA-182263;R-HSA-164500;R-HSA-164507;R-HSA-164521;R-HSA-3159227;R-HSA-200952;R-HSA-182286;R-HSA-164524;R-HSA-164508
R-HSA-927802	Nonsense-Mediated Decay (NMD)	2	124	0.00868895	0.998905	0.998905	5	6	0.000441924	9606	Homo sapiens	Rps16;Tifa		R-HSA-927836;R-HSA-927789;R-HSA-927832;R-HSA-927813;R-HSA-927889
R-HSA-975957	Nonsense Mediated Decay (NMD) enhanced by the Exon Junction Complex (EJC)	2	124	0.00868895	0.998905	0.998905	4	5	0.00036827	9606	Homo sapiens	Rps16;Tifa		R-HSA-927836;R-HSA-927832;R-HSA-927813;R-HSA-927889
R-HSA-5693567	HDR through Homologous Recombination (HRR) or Single Strand Annealing (SSA)	2	124	0.00868895	0.998905	0.998905	14	42	0.00309347	9606	Homo sapiens	Rad51b;Hist1h4i		R-HSA-5693620;R-HSA-5684052;R-HSA-5693589;R-HSA-5686483;R-HSA-5693584;R-HSA-5685341;R-HSA-5693593;R-HSA-5685318;R-HSA-5684071;R-HSA-5686469;R-HSA-5693539;R-HSA-5685838;R-HSA-5686410;R-HSA-5686440
R-HSA-2871796	FCERI mediated MAPK activation	2	124	0.00868895	0.998905	0.998905	2	20	0.00147308	9606	Homo sapiens	Syk;Ms4a2		R-HSA-2730851;R-HSA-2730886
R-HSA-5610787	Hedgehog 'off' state	2	124	0.00868895	0.998905	0.998905	2	32	0.00235693	9606	Homo sapiens	Gpr161;Adcy2		R-HSA-5610725;R-HSA-5610727
R-HSA-450531	Regulation of mRNA stability by proteins that bind AU-rich elements	1	93	0.00651671	0.998936	0.998936	1	26	0.001915	9606	Homo sapiens	Enpp2		R-HSA-450595
R-HSA-1280218	Adaptive Immune System	50	1005	0.0704225	0.998972	0.998972	76	264	0.0194446	9606	Homo sapiens	Fbxl22;Cd300ld;Ctsc;Ctsd;Cd1d1;Ubox5;Ncf1;Ncf4;Cd300lf;Mafa;Sec24d;Cd101;Klc3;Itga4;Trpc1;Ifngr1;Acp1;Pak3;S100a9;Pag1;Oscar;Cd86;Spsb2;Ap1m2;Apc2;Fcgr3;Syk;Ap1s2;Cd80;Klrg1;Fbxo17;Cd209a;Itgb7;Klrc1;Kbtbd8;Lonrf1;Vcam1;Anapc10;Gan;Itgb2;Icam1;Ptpn22;Mal;Pik3r1;Asb16;Itpr3;Lnx1		R-HSA-389381;R-HSA-9606162;R-HSA-9606163;R-HSA-9606160;R-HSA-199050;R-HSA-2130731;R-HSA-202248;R-HSA-2130349;R-HSA-983426;R-HSA-983425;R-HSA-983424;R-HSA-8863895;R-HSA-8850326;R-HSA-983707;R-HSA-9606151;R-HSA-199062;R-HSA-983703;R-HSA-389788;R-HSA-983700;R-HSA-2130619;R-HSA-9606159;R-HSA-198941;R-HSA-2213248;R-HSA-389158;R-HSA-2076220;R-HSA-199079;R-HSA-198955;R-HSA-5696358;R-HSA-2130706;R-HSA-56…
R-HSA-6807505	RNA polymerase II transcribes snRNA genes	1	94	0.00658678	0.999011	0.999011	5	11	0.000810194	9606	Homo sapiens	Ell3		R-HSA-6814885;R-HSA-6814549;R-HSA-6814559;R-HSA-6814555;R-HSA-6814554
R-HSA-975871	MyD88 cascade initiated on plasma membrane	1	94	0.00658678	0.999011	0.999011	3	58	0.00427193	9606	Homo sapiens	Map2k6		R-HSA-450333;R-HSA-450346;R-HSA-450296
R-HSA-168176	Toll Like Receptor 5 (TLR5) Cascade	1	94	0.00658678	0.999011	0.999011	3	59	0.00434558	9606	Homo sapiens	Map2k6		R-HSA-450333;R-HSA-450346;R-HSA-450296
R-HSA-168142	Toll Like Receptor 10 (TLR10) Cascade	1	94	0.00658678	0.999011	0.999011	3	59	0.00434558	9606	Homo sapiens	Map2k6		R-HSA-450333;R-HSA-450346;R-HSA-450296
R-HSA-9675108	Nervous system development	27	621	0.0435148	0.999029	0.999029	83	324	0.0238639	9606	Homo sapiens	Cacna1h;Rps16;Efna2;Nrp2;Myh14;Trpc1;Gfra1;Pak3;Pak4;Ngef;Itga10;Ablim2;Ablim3;Dag1;Scn8a;Ank3;Nrcam;Plxnc1;Plxna1;Epha3;Farp2;Dok2;Lama1;Adgrv1;Tifa;Pik3r1		R-HSA-525833;R-HSA-443778;R-HSA-8853762;R-HSA-9010190;R-HSA-8853774;R-HSA-3928625;R-HSA-8855564;R-HSA-445067;R-HSA-3928628;R-HSA-445076;R-HSA-3928616;R-HSA-374675;R-HSA-8853789;R-HSA-3928602;R-HSA-3928607;R-HSA-445088;R-HSA-8853793;R-HSA-3928604;R-HSA-8853792;R-HSA-9614778;R-HSA-392751;R-HSA-434989;R-HSA-3928597;R-HSA-8853800;R-HSA-447030;R-HSA-9010872;R-HSA-4093327;R-HSA-3928584;R-HSA-3928591;R-…
R-HSA-168256	Immune System	159	2684	0.188074	0.999074	0.999074	395	1623	0.11954	9606	Homo sapiens	Fbxl22;Ncf1;Creg1;Cxcr1;Cxcr2;Ncf4;Prtn3;Cd101;Pnp;Tnfrsf11b;Tnfrsf11a;Mcemp1;Rab31;Tnfsf4;Cd86;Cd80;Pcbp3;Klrg1;F13a1;Fbxo17;Lama5;C4b;Dok2;44808;Tifa;Icam1;Mal;Pkp1;Csf3;Mgam;Ubox5;Cfh;C5ar2;C5ar1;Cotl1;Fpr2;Mafa;Cfp;Dtx4;Ly86;Clec12a;Klc3;Dpp7;Itga4;Elmo1;Neu1;Il1f9;Ifngr1;Hpse;Tcirg1;S100a9;Pag1;Ap1m2;Ccr1;Il27ra;Sirpa;Vcam1;Lonrf1;Eif4a2;Bcl2;Eda2r;Itpr3;Cd300ld;Ctsc;Ctsd;Cd300lf;Atp6v0e2;Cs…		R-HSA-8863895;R-HSA-913424;R-HSA-389158;R-HSA-6786114;R-HSA-913451;R-HSA-9679029;R-HSA-167983;R-HSA-8937656;R-HSA-937022;R-HSA-8937654;R-HSA-6807585;R-HSA-448591;R-HSA-6786092;R-HSA-6800426;R-HSA-6786101;R-HSA-6800434;R-HSA-8854738;R-HSA-6786096;R-HSA-6786110;R-HSA-430183;R-HSA-9699574;R-HSA-9699575;R-HSA-983147;R-HSA-6786050;R-HSA-9699581;R-HSA-9705726;R-HSA-983140;R-HSA-937059;R-HSA-6786058;R-H…
R-HSA-380320	Recruitment of NuMA to mitotic centrosomes	1	97	0.006797	0.999208	0.999208	2	2	0.000147308	9606	Homo sapiens	Ninl		R-HSA-380316;R-HSA-380508
R-HSA-156902	Peptide chain elongation	1	97	0.006797	0.999208	0.999208	4	5	0.00036827	9606	Homo sapiens	Rps16		R-HSA-156915;R-HSA-156912;R-HSA-156923;R-HSA-156907
R-HSA-9664407	Parasite infection	3	157	0.0110013	0.99925	0.99925	10	27	0.00198866	9606	Homo sapiens	Fcgr3;Syk;Elmo1		R-HSA-9666435;R-HSA-9664275;R-HSA-9664273;R-HSA-9664406;R-HSA-9664261;R-HSA-9666426;R-HSA-9666458;R-HSA-9666425;R-HSA-9666430;R-HSA-9666428
R-HSA-9664422	FCGR3A-mediated phagocytosis	3	157	0.0110013	0.99925	0.99925	10	27	0.00198866	9606	Homo sapiens	Fcgr3;Syk;Elmo1		R-HSA-9666435;R-HSA-9664275;R-HSA-9664273;R-HSA-9664406;R-HSA-9664261;R-HSA-9666426;R-HSA-9666458;R-HSA-9666425;R-HSA-9666430;R-HSA-9666428
R-HSA-9664417	Leishmania phagocytosis	3	157	0.0110013	0.99925	0.99925	10	27	0.00198866	9606	Homo sapiens	Fcgr3;Syk;Elmo1		R-HSA-9666435;R-HSA-9664275;R-HSA-9664273;R-HSA-9664406;R-HSA-9664261;R-HSA-9666426;R-HSA-9666458;R-HSA-9666425;R-HSA-9666430;R-HSA-9666428
R-HSA-5689603	UCH proteinases	1	98	0.00686707	0.999264	0.999264	1	11	0.000810194	9606	Homo sapiens	Hist1h2ac		R-HSA-5690790
R-HSA-72737	Cap-dependent Translation Initiation	2	130	0.00910938	0.999267	0.999267	13	18	0.00132577	9606	Homo sapiens	Rps16;Eif4a2		R-HSA-72673;R-HSA-72672;R-HSA-72676;R-HSA-72647;R-HSA-72619;R-HSA-156808;R-HSA-72621;R-HSA-72691;R-HSA-72631;R-HSA-72697;R-HSA-72635;R-HSA-157849;R-HSA-72671
R-HSA-72613	Eukaryotic Translation Initiation	2	130	0.00910938	0.999267	0.999267	14	21	0.00154673	9606	Homo sapiens	Rps16;Eif4a2		R-HSA-72673;R-HSA-72672;R-HSA-72676;R-HSA-72647;R-HSA-72619;R-HSA-156808;R-HSA-72621;R-HSA-72691;R-HSA-156823;R-HSA-72631;R-HSA-72697;R-HSA-72635;R-HSA-157849;R-HSA-72671
R-HSA-3108232	SUMO E3 ligases SUMOylate target proteins	4	183	0.0128232	0.999289	0.999289	6	131	0.00964867	9606	Homo sapiens	Hist1h4i;Tdg;Mal;Mitf		R-HSA-4570485;R-HSA-3232162;R-HSA-4551648;R-HSA-4570496;R-HSA-3900070;R-HSA-4551738
R-HSA-2029482	Regulation of actin dynamics for phagocytic cup formation	3	158	0.0110714	0.999295	0.999295	6	24	0.0017677	9606	Homo sapiens	Fcgr3;Syk;Elmo1		R-HSA-2197697;R-HSA-2029453;R-HSA-2029467;R-HSA-2029451;R-HSA-2029476;R-HSA-2029458
R-HSA-446219	Synthesis of substrates in N-glycan biosythesis	2	131	0.00917945	0.999314	0.999314	2	49	0.00360904	9606	Homo sapiens	Amdhd2;Neu1		R-HSA-4084999;R-HSA-6803789
R-HSA-73887	Death Receptor Signalling	3	159	0.0111415	0.999338	0.999338	38	93	0.00684982	9606	Homo sapiens	Ngfr;Arhgef16;Ngef		R-HSA-193665;R-HSA-193668;R-HSA-193669;R-HSA-193672;R-HSA-193679;R-HSA-193677;R-HSA-205132;R-HSA-9012761;R-HSA-193682;R-HSA-193686;R-HSA-204949;R-HSA-193684;R-HSA-193694;R-HSA-204958;R-HSA-209566;R-HSA-193695;R-HSA-193696;R-HSA-193702;R-HSA-193703;R-HSA-209573;R-HSA-193636;R-HSA-193700;R-HSA-193642;R-HSA-193643;R-HSA-193641;R-HSA-193705;R-HSA-205039;R-HSA-193646;R-HSA-193647;R-HSA-193650;R-HSA-19…
R-HSA-112310	Neurotransmitter release cycle	1	100	0.00700722	0.999365	0.999365	10	37	0.0027252	9606	Homo sapiens	Rbp1		R-HSA-380901;R-HSA-380869;R-HSA-372529;R-HSA-374899;R-HSA-210426;R-HSA-380574;R-HSA-372505;R-HSA-380905;R-HSA-210430;R-HSA-374922
R-HSA-168928	DDX58/IFIH1-mediated induction of interferon-alpha/beta	1	100	0.00700722	0.999365	0.999365	2	53	0.00390366	9606	Homo sapiens	Pcbp3		R-HSA-990526;R-HSA-990528
R-HSA-72163	mRNA Splicing - Major Pathway	4	185	0.0129634	0.999368	0.999368	8	9	0.000662886	9606	Homo sapiens	Tifa;Pcbp3;Rbp1;Snrpf		R-HSA-72160;R-HSA-72130;R-HSA-156661;R-HSA-72139;R-HSA-72107;R-HSA-72124;R-HSA-72143;R-HSA-72127
R-HSA-112314	Neurotransmitter receptors and postsynaptic signal transmission	6	232	0.0162567	0.999382	0.999382	11	109	0.00802828	9606	Homo sapiens	Gngt2;Kcnj14;Gabrb3;Kcnj9;Adcy2		R-HSA-170674;R-HSA-975340;R-HSA-1013020;R-HSA-170666;R-HSA-8856398;R-HSA-1013013;R-HSA-500717;R-HSA-392206;R-HSA-1013012;R-HSA-170686;R-HSA-170671
R-HSA-69239	Synthesis of DNA	2	133	0.0093196	0.9994	0.9994	1	26	0.001915	9606	Homo sapiens	Apc2;Anapc10		R-HSA-69015
R-HSA-1852241	Organelle biogenesis and maintenance	11	338	0.0236844	0.999405	0.999405	32	86	0.00633424	9606	Homo sapiens	Ttc26;Arl6;Nphp4;Tctn1;Kif24;Nphp1;Cngb1;Bbs9;Ninl;Hdac6;Ubxn6		R-HSA-5617815;R-HSA-5625424;R-HSA-5625426;R-HSA-5617820;R-HSA-5623519;R-HSA-5623513;R-HSA-5617816;R-HSA-5618331;R-HSA-5624129;R-HSA-1368140;R-HSA-5625421;R-HSA-5625416;R-HSA-5626699;R-HSA-5624949;R-HSA-5626228;R-HSA-5620918;R-HSA-5626227;R-HSA-5620914;R-HSA-5624125;R-HSA-5624127;R-HSA-5624126;R-HSA-5620921;R-HSA-5626681;R-HSA-5624952;R-HSA-5638009;R-HSA-5623525;R-HSA-5623524;R-HSA-5623527;R-HSA-5…
R-HSA-975956	Nonsense Mediated Decay (NMD) independent of the Exon Junction Complex (EJC)	1	101	0.00707729	0.999411	0.999411	1	1	7.3654e-05	9606	Homo sapiens	Rps16		R-HSA-927789
R-HSA-156842	Eukaryotic Translation Elongation	1	102	0.00714736	0.999453	0.999453	4	9	0.000662886	9606	Homo sapiens	Rps16		R-HSA-156915;R-HSA-156912;R-HSA-156923;R-HSA-156907
R-HSA-168164	Toll Like Receptor 3 (TLR3) Cascade	1	102	0.00714736	0.999453	0.999453	3	61	0.00449289	9606	Homo sapiens	Map2k6		R-HSA-450333;R-HSA-450346;R-HSA-450296
R-HSA-376176	Signaling by ROBO receptors	6	235	0.016467	0.999475	0.999475	5	60	0.00441924	9606	Homo sapiens	Rps16;Nrp2;Tifa;Dag1;Pak3;Pak4		R-HSA-9010872;R-HSA-428531;R-HSA-9014652;R-HSA-9010190;R-HSA-9014610
R-HSA-983170	Antigen Presentation: Folding, assembly and peptide loading of class I MHC	1	103	0.00721743	0.999492	0.999492	5	16	0.00117846	9606	Homo sapiens	Sec24d		R-HSA-983422;R-HSA-203979;R-HSA-983426;R-HSA-983425;R-HSA-983424
R-HSA-983705	Signaling by the B Cell Receptor (BCR)	4	189	0.0132436	0.999502	0.999502	17	44	0.00324077	9606	Homo sapiens	Syk;Trpc1;Pik3r1;Itpr3		R-HSA-9606162;R-HSA-9606163;R-HSA-9606160;R-HSA-2076220;R-HSA-2089943;R-HSA-2045911;R-HSA-1168376;R-HSA-1112666;R-HSA-169683;R-HSA-169680;R-HSA-983707;R-HSA-9606151;R-HSA-9606887;R-HSA-2089927;R-HSA-983703;R-HSA-983700;R-HSA-9606159
R-HSA-2990846	SUMOylation	4	192	0.0134539	0.999583	0.999583	6	140	0.0103116	9606	Homo sapiens	Hist1h4i;Tdg;Mal;Mitf		R-HSA-4570485;R-HSA-3232162;R-HSA-4551648;R-HSA-4570496;R-HSA-3900070;R-HSA-4551738
R-HSA-72689	Formation of a pool of free 40S subunits	1	106	0.00742765	0.999593	0.999593	2	2	0.000147308	9606	Homo sapiens	Rps16		R-HSA-72673;R-HSA-72676
R-HSA-72764	Eukaryotic Translation Termination	1	106	0.00742765	0.999593	0.999593	3	5	0.00036827	9606	Homo sapiens	Rps16		R-HSA-141671;R-HSA-141691;R-HSA-141673
R-HSA-937061	TRIF(TICAM1)-mediated TLR4 signaling	1	107	0.00749772	0.999622	0.999622	3	58	0.00427193	9606	Homo sapiens	Map2k6		R-HSA-450333;R-HSA-450346;R-HSA-450296
R-HSA-166166	MyD88-independent TLR4 cascade	1	107	0.00749772	0.999622	0.999622	3	60	0.00441924	9606	Homo sapiens	Map2k6		R-HSA-450333;R-HSA-450346;R-HSA-450296
R-HSA-1236975	Antigen processing-Cross presentation	4	195	0.0136641	0.999652	0.999652	2	23	0.00169404	9606	Homo sapiens	Ncf1;Ncf4;Mal;S100a9		R-HSA-8863895;R-HSA-1236967
R-HSA-382551	Transport of small molecules	45	961	0.0673394	0.999671	0.999671	76	443	0.0326287	9606	Homo sapiens	Slc27a1;Fxyd3;Atp1a3;Atp10d;Aqp3;Atp6v0e2;Aqp1;Slc22a15;Abcd2;Abcb6;Derl3;Trpc1;Tcirg1;Trpv3;Adcy2;Derl1;Trpv2;Atp6v0c;Slc17a8;Slc7a1;Slc16a7;Slc9a4;Clcn6;Apc2;Slc5a6;Gngt2;Tfrc;Atp1b2;Atp2b4;Lrrc8e;Ano6;Atp6v0d2;Abcc4;Lipc;Ttyh1;Nat2;Pcsk9;Ldlr;Slc24a5;Slc27a6		R-HSA-418309;R-HSA-6784738;R-HSA-171141;R-HSA-6784622;R-HSA-947591;R-HSA-429581;R-HSA-425994;R-HSA-432010;R-HSA-382613;R-HSA-428052;R-HSA-445714;R-HSA-5626316;R-HSA-2744242;R-HSA-164377;R-HSA-1237042;R-HSA-917807;R-HSA-174624;R-HSA-163617;R-HSA-433698;R-HSA-174757;R-HSA-432054;R-HSA-171059;R-HSA-1247649;R-HSA-2744349;R-HSA-422320;R-HSA-6784735;R-HSA-917814;R-HSA-549297;R-HSA-6784734;R-HSA-432188;…
R-HSA-72172	mRNA Splicing	4	196	0.0137341	0.999672	0.999672	13	14	0.00103116	9606	Homo sapiens	Tifa;Pcbp3;Rbp1;Snrpf		R-HSA-72160;R-HSA-72130;R-HSA-75079;R-HSA-75081;R-HSA-75080;R-HSA-72139;R-HSA-72107;R-HSA-75083;R-HSA-75082;R-HSA-72143;R-HSA-156661;R-HSA-72124;R-HSA-72127
R-HSA-9020702	Interleukin-1 signaling	1	109	0.00763787	0.999674	0.999674	1	47	0.00346174	9606	Homo sapiens	Map2k6		R-HSA-727819
R-HSA-5653656	Vesicle-mediated transport	37	827	0.0579497	0.999686	0.999686	81	252	0.0185608	9606	Homo sapiens	Hip1;Cyth2;Ctsc;Hsph1;Stab1;Galnt2;Sec22c;Dab2;Sec24d;Klc3;Dennd4a;Epgn;Chmp4c;Usp6nl;Acp1;Rab31;Ap1m2;Tfrc;Sh3gl3;Ap1s2;Ank3;Kif1a;Rab8b;Tpd52l1;Rab6b;Scarf1;F5;Btc;Scarb2;Rinl;Ssc5d;Sort1;Ldlr;Rin1		R-HSA-8868230;R-HSA-5694423;R-HSA-5694421;R-HSA-5694418;R-HSA-5694417;R-HSA-5694431;R-HSA-5694428;R-HSA-8868236;R-HSA-8878603;R-HSA-8847883;R-HSA-5694425;R-HSA-8847880;R-HSA-8854303;R-HSA-8876190;R-HSA-8876188;R-HSA-5694413;R-HSA-8871194;R-HSA-8871193;R-HSA-5694409;R-HSA-8854182;R-HSA-6807877;R-HSA-6807875;R-HSA-8876193;R-HSA-8847534;R-HSA-8867756;R-HSA-2197770;R-HSA-8868651;R-HSA-2197645;R-HSA-8…
R-HSA-913531	Interferon Signaling	13	394	0.0276084	0.999716	0.999716	19	69	0.00508212	9606	Homo sapiens	Vcam1;Oas2;Eif4a2;Ifngr1;Tifa;Icam1;Irf5;Irf6		R-HSA-8985097;R-HSA-1678842;R-HSA-873924;R-HSA-873927;R-HSA-873926;R-HSA-1031716;R-HSA-873921;R-HSA-1031713;R-HSA-873922;R-HSA-877308;R-HSA-873919;R-HSA-9678561;R-HSA-873918;R-HSA-877269;R-HSA-1015702;R-HSA-8985104;R-HSA-8985138;R-HSA-1015699;R-HSA-909552
R-HSA-2408557	Selenocysteine synthesis	1	112	0.00784808	0.999739	0.999739	2	7	0.000515578	9606	Homo sapiens	Rps16		R-HSA-2408529;R-HSA-5333615
R-HSA-983169	Class I MHC mediated antigen processing & presentation	17	474	0.0332142	0.999743	0.999743	11	48	0.00353539	9606	Homo sapiens	Fbxl22;Spsb2;Apc2;Ubox5;Ncf1;Ncf4;Fbxo17;Sec24d;Kbtbd8;Lonrf1;Anapc10;Gan;Ifngr1;Mal;Asb16;S100a9;Lnx1		R-HSA-8863895;R-HSA-983422;R-HSA-983147;R-HSA-1236967;R-HSA-203979;R-HSA-983157;R-HSA-983156;R-HSA-983140;R-HSA-983426;R-HSA-983425;R-HSA-983424
R-HSA-1483257	Phospholipid metabolism	9	315	0.0220727	0.999754	0.999754	16	218	0.0160566	9606	Homo sapiens	Pcyt1b;Pi4k2b;Gdpd3;Plekha4;Pik3r6;Mboat1;Mboat2;Pik3r1;Ptpn13		R-HSA-1482646;R-HSA-1676185;R-HSA-1482547;R-HSA-1676048;R-HSA-1482533;R-HSA-1676109;R-HSA-1482691;R-HSA-1482636;R-HSA-8870332;R-HSA-1675813;R-HSA-6814778;R-HSA-1482667;R-HSA-1675780;R-HSA-8870489;R-HSA-1675974;R-HSA-1483081
R-HSA-192105	Synthesis of bile acids and bile salts	1	113	0.00791816	0.999757	0.999757	3	83	0.00611328	9606	Homo sapiens	Ptgis		R-HSA-193845;R-HSA-192157;R-HSA-193709
R-HSA-192823	Viral mRNA Translation	1	114	0.00798823	0.999775	0.999775	2	2	0.000147308	9606	Homo sapiens	Rps16		R-HSA-192704;R-HSA-192841
R-HSA-9633012	Response of EIF2AK4 (GCN2) to amino acid deficiency	1	115	0.0080583	0.999791	0.999791	4	16	0.00117846	9606	Homo sapiens	Rps16		R-HSA-9633008;R-HSA-9633742;R-HSA-9634669;R-HSA-9633005
R-HSA-5633007	Regulation of TP53 Activity	3	178	0.0124728	0.999801	0.999801	5	98	0.00721809	9606	Homo sapiens	Dyrk3;Trp53inp1;Map2k6		R-HSA-6798374;R-HSA-3215251;R-HSA-6798372;R-HSA-6799409;R-HSA-8877691
R-HSA-162587	HIV Life Cycle	3	179	0.0125429	0.999813	0.999813	8	117	0.00861751	9606	Homo sapiens	Chmp4c;Ccr5		R-HSA-3159232;R-HSA-164515;R-HSA-164500;R-HSA-164507;R-HSA-164521;R-HSA-3159227;R-HSA-164524;R-HSA-164508
R-HSA-381753	Olfactory Signaling Pathway	1	117	0.00819844	0.999819	0.999819	2	9	0.000662886	9606	Homo sapiens	Cngb1		R-HSA-9712199;R-HSA-9712190
R-HSA-5673001	RAF/MAP kinase cascade	9	322	0.0225632	0.999828	0.999828	4	75	0.00552405	9606	Homo sapiens	Btc;Dusp2;Epgn;Csf2rb;Erbb3;Angpt1;Gfra1;Pik3r1;Dusp8		R-HSA-5672965;R-HSA-5675376;R-HSA-5675373;R-HSA-9658253
R-HSA-9006925	Intracellular signaling by second messengers	11	366	0.0256464	0.999843	0.999843	8	114	0.00839655	9606	Homo sapiens	Btc;Cd86;Epgn;Cd80;Erbb3;Pde1a;Rac2;Adcy2;Pik3r1;Foxo3;Itpr3		R-HSA-199299;R-HSA-2316434;R-HSA-169683;R-HSA-111955;R-HSA-169680;R-HSA-111956;R-HSA-111930;R-HSA-114542
R-HSA-1799339	SRP-dependent cotranslational protein targeting to membrane	1	119	0.00833859	0.999844	0.999844	5	5	0.00036827	9606	Homo sapiens	Rps16		R-HSA-1799326;R-HSA-1799330;R-HSA-1799329;R-HSA-1799335;R-HSA-1799332
R-HSA-5696398	Nucleotide Excision Repair	1	119	0.00833859	0.999844	0.999844	13	37	0.0027252	9606	Homo sapiens	Parp2		R-HSA-5690996;R-HSA-5696670;R-HSA-5696664;R-HSA-5691000;R-HSA-6790487;R-HSA-6790454;R-HSA-5690213;R-HSA-5689317;R-HSA-5689861;R-HSA-5690990;R-HSA-5696655;R-HSA-5690991;R-HSA-5690988
R-HSA-163200	Respiratory electron transport, ATP synthesis by chemiosmotic coupling, and heat production by uncoupling proteins.	2	153	0.010721	0.999845	0.999845	4	31	0.00228327	9606	Homo sapiens	Ucp2;Slc25a14		R-HSA-166387;R-HSA-166214;R-HSA-170026;R-HSA-166220
R-HSA-9010553	Regulation of expression of SLITs and ROBOs	3	183	0.0128232	0.999855	0.999855	3	20	0.00147308	9606	Homo sapiens	Rps16;Tifa;Dag1		R-HSA-9010872;R-HSA-9014652;R-HSA-9014610
R-HSA-9711123	Cellular response to chemical stress	4	212	0.0148553	0.999876	0.999876	3	71	0.00522943	9606	Homo sapiens	Ncf1;Ncf4;Gsr		R-HSA-71682;R-HSA-3323079;R-HSA-1222376
R-HSA-5684996	MAPK1/MAPK3 signaling	9	329	0.0230537	0.99988	0.99988	4	82	0.00603963	9606	Homo sapiens	Btc;Dusp2;Epgn;Csf2rb;Erbb3;Angpt1;Gfra1;Pik3r1;Dusp8		R-HSA-5672965;R-HSA-5675376;R-HSA-5675373;R-HSA-9658253
R-HSA-1428517	The citric acid (TCA) cycle and respiratory electron transport	5	238	0.0166772	0.999882	0.999882	8	67	0.00493482	9606	Homo sapiens	Ldha;Ucp2;Pdk4;Pkp1;Slc25a14		R-HSA-166387;R-HSA-166214;R-HSA-170026;R-HSA-71849;R-HSA-203946;R-HSA-166220;R-HSA-9011543;R-HSA-70510
R-HSA-202424	Downstream TCR signaling	1	124	0.00868895	0.999892	0.999892	2	24	0.0017677	9606	Homo sapiens	Pik3r1		R-HSA-202203;R-HSA-202365
R-HSA-446193	Biosynthesis of the N-glycan precursor (dolichol lipid-linked oligosaccharide, LLO) and transfer to a nascent protein	2	159	0.0111415	0.999897	0.999897	2	63	0.0046402	9606	Homo sapiens	Amdhd2;Neu1		R-HSA-4084999;R-HSA-6803789
R-HSA-194068	Bile acid and bile salt metabolism	1	125	0.00875902	0.9999	0.9999	3	99	0.00729174	9606	Homo sapiens	Ptgis		R-HSA-193845;R-HSA-192157;R-HSA-193709
R-HSA-5628897	TP53 Regulates Metabolic Genes	1	126	0.00882909	0.999907	0.999907	1	34	0.00250424	9606	Homo sapiens	Gsr		R-HSA-71682
R-HSA-5663202	Diseases of signal transduction by growth factor receptors and second messengers	17	498	0.0348959	0.999909	0.999909	78	484	0.0356485	9606	Homo sapiens	Hip1;Clcn6;Cd86;Cd80;Erbb3;Esrp1;Dkk2;Btc;Smad2;Wdcp;Epgn;Rac2;Syvn1;Pik3r1;Foxo3;Hdac6;Dusp8		R-HSA-5655252;R-HSA-5655248;R-HSA-6802927;R-HSA-5655263;R-HSA-9664664;R-HSA-1226014;R-HSA-9670431;R-HSA-1226012;R-HSA-6802935;R-HSA-9698179;R-HSA-6802934;R-HSA-6802933;R-HSA-6802932;R-HSA-3311014;R-HSA-9665415;R-HSA-9664646;R-HSA-5655235;R-HSA-1839114;R-HSA-2220982;R-HSA-5655245;R-HSA-9703439;R-HSA-9703434;R-HSA-5655240;R-HSA-1839107;R-HSA-5655285;R-HSA-9664567;R-HSA-9664950;R-HSA-5387386;R-HSA-3…
R-HSA-446203	Asparagine N-linked glycosylation	13	421	0.0295004	0.999919	0.999919	28	144	0.0106062	9606	Homo sapiens	Ctsc;Amdhd2;C1qtnf1;Ank3;Trim13;Mgat3;Sec22c;Sec24d;F5;Neu1;Syvn1;Derl1;Acp1		R-HSA-5694423;R-HSA-5694421;R-HSA-5694418;R-HSA-8853379;R-HSA-203973;R-HSA-5694417;R-HSA-5694431;R-HSA-6809006;R-HSA-5694428;R-HSA-6809003;R-HSA-5694425;R-HSA-6809011;R-HSA-6809010;R-HSA-5694413;R-HSA-5694409;R-HSA-8867288;R-HSA-6807877;R-HSA-6807875;R-HSA-8850594;R-HSA-5694527;R-HSA-6803789;R-HSA-204008;R-HSA-5694522;R-HSA-5694439;R-HSA-5694446;R-HSA-975926;R-HSA-4084999;R-HSA-5694441
R-HSA-1592230	Mitochondrial biogenesis	1	128	0.00896924	0.99992	0.99992	1	36	0.00265154	9606	Homo sapiens	Ubxn6		R-HSA-1368140
R-HSA-5683057	MAPK family signaling cascades	11	380	0.0266274	0.999921	0.999921	11	122	0.00898578	9606	Homo sapiens	Btc;Dusp2;Epgn;Csf2rb;Erbb3;Angpt1;Gfra1;Pik3r1;Pak3;Foxo3;Dusp8		R-HSA-5687126;R-HSA-5687095;R-HSA-5672965;R-HSA-5675376;R-HSA-5687086;R-HSA-389788;R-HSA-5687103;R-HSA-5627775;R-HSA-5675373;R-HSA-5687101;R-HSA-9658253
R-HSA-425366	Transport of bile salts and organic acids, metal ions and amine compounds	2	163	0.0114218	0.999922	0.999922	2	67	0.00493482	9606	Homo sapiens	Slc22a15;Slc16a7		R-HSA-433698;R-HSA-549297
R-HSA-162599	Late Phase of HIV Life Cycle	2	164	0.0114918	0.999927	0.999927	2	78	0.00574501	9606	Homo sapiens	Chmp4c		R-HSA-3159232;R-HSA-3159227
R-HSA-1257604	PIP3 activates AKT signaling	8	319	0.022353	0.999936	0.999936	3	86	0.00633424	9606	Homo sapiens	Btc;Cd86;Epgn;Cd80;Erbb3;Rac2;Pik3r1;Foxo3		R-HSA-199299;R-HSA-2316434;R-HSA-114542
R-HSA-68882	Mitotic Anaphase	5	249	0.017448	0.999938	0.999938	10	32	0.00235693	9606	Homo sapiens	Apc2;Anapc10;Chmp4c;Vrk2		R-HSA-2995389;R-HSA-9668419;R-HSA-174144;R-HSA-9668389;R-HSA-9668405;R-HSA-174202;R-HSA-9668395;R-HSA-174121;R-HSA-9668415;R-HSA-9668398
R-HSA-112315	Transmission across Chemical Synapses	9	343	0.0240348	0.999942	0.999942	23	163	0.0120056	9606	Homo sapiens	Gngt2;Nat2;Kcnj14;Gabrb3;Rbp1;Kcnj9;Adcy2;Glul		R-HSA-380901;R-HSA-380869;R-HSA-975340;R-HSA-212614;R-HSA-170666;R-HSA-8856398;R-HSA-500717;R-HSA-392206;R-HSA-380905;R-HSA-170671;R-HSA-70606;R-HSA-374922;R-HSA-170674;R-HSA-1013020;R-HSA-372529;R-HSA-374899;R-HSA-210426;R-HSA-1013013;R-HSA-380574;R-HSA-1013012;R-HSA-372505;R-HSA-170686;R-HSA-210430
R-HSA-2555396	Mitotic Metaphase and Anaphase	5	250	0.017518	0.999942	0.999942	10	33	0.00243058	9606	Homo sapiens	Apc2;Anapc10;Chmp4c;Vrk2		R-HSA-2995389;R-HSA-9668419;R-HSA-174144;R-HSA-9668389;R-HSA-9668405;R-HSA-174202;R-HSA-9668395;R-HSA-174121;R-HSA-9668415;R-HSA-9668398
R-HSA-112316	Neuronal System	16	489	0.0342653	0.999944	0.999944	33	216	0.0159093	9606	Homo sapiens	Gngt2;Rtn1;Kcnj9;Kcnb1;Kcnk2;Homer2;Kcnj14;Nat2;Gabrb3;Rbp1;Adcy2;Ptprf;Glul		R-HSA-380869;R-HSA-212614;R-HSA-8856398;R-HSA-392206;R-HSA-6794347;R-HSA-70606;R-HSA-374922;R-HSA-1296348;R-HSA-6794344;R-HSA-1013020;R-HSA-6794355;R-HSA-6798258;R-HSA-1013013;R-HSA-380574;R-HSA-1013012;R-HSA-372505;R-HSA-8849882;R-HSA-388824;R-HSA-380901;R-HSA-975340;R-HSA-8855648;R-HSA-170666;R-HSA-500717;R-HSA-380905;R-HSA-1296127;R-HSA-170671;R-HSA-170674;R-HSA-372529;R-HSA-374899;R-HSA-21042…
R-HSA-211859	Biological oxidations	19	549	0.0384696	0.999947	0.999947	48	188	0.0138469	9606	Homo sapiens	Tbxas1;Acy3;Sult1a1;Cyp2s1;Chac1;Ptgis;Cyp26b1;Cmbl;44808;Nat2;Ephx1;Cyp4b1;Ahrr;Fdxr;Ggt1;Oplah		R-HSA-76416;R-HSA-158849;R-HSA-76354;R-HSA-176646;R-HSA-211910;R-HSA-158468;R-HSA-176585;R-HSA-9638046;R-HSA-158860;R-HSA-193997;R-HSA-193101;R-HSA-76496;R-HSA-76434;R-HSA-211991;R-HSA-76500;R-HSA-211988;R-HSA-211924;R-HSA-176474;R-HSA-211929;R-HSA-8936851;R-HSA-176669;R-HSA-192157;R-HSA-211874;R-HSA-5433072;R-HSA-211873;R-HSA-212007;R-HSA-215526;R-HSA-212005;R-HSA-8943279;R-HSA-212004;R-HSA-6786…
R-HSA-5619115	Disorders of transmembrane transporters	6	278	0.0194801	0.999953	0.999953	7	87	0.0064079	9606	Homo sapiens	Abcd2;Abcb6;Derl3;Derl1;Slc24a5;Slc17a8		R-HSA-5626356;R-HSA-8866854;R-HSA-5624256;R-HSA-5683355;R-HSA-5684043;R-HSA-8866857;R-HSA-8866856
R-HSA-9717207	Sensory perception of sweet, bitter, and umami (glutamate) taste	1	137	0.00959989	0.999959	0.999959	2	21	0.00154673	9606	Homo sapiens	Itpr3		R-HSA-9717214;R-HSA-9717215
R-HSA-1236974	ER-Phagosome pathway	2	173	0.0121225	0.999961	0.999961	1	10	0.00073654	9606	Homo sapiens	Mal;S100a9		R-HSA-8863895
R-HSA-453279	Mitotic G1 phase and G1/S transition	2	173	0.0121225	0.999961	0.999961	9	99	0.00729174	9606	Homo sapiens	Ccnd2;Cdkn1c		R-HSA-8941915;R-HSA-8942607;R-HSA-9018017;R-HSA-69227;R-HSA-8942803;R-HSA-1226094;R-HSA-8942836;R-HSA-1226095;R-HSA-8941895
R-HSA-2454202	Fc epsilon receptor (FCERI) signaling	4	235	0.016467	0.99997	0.99997	17	65	0.00478751	9606	Homo sapiens	Syk;Pik3r1;Itpr3;Ms4a2		R-HSA-2730888;R-HSA-9725206;R-HSA-2730860;R-HSA-2454240;R-HSA-2454208;R-HSA-2730851;R-HSA-2730882;R-HSA-2730884;R-HSA-2730886;R-HSA-169683;R-HSA-2730843;R-HSA-169680;R-HSA-2730842;R-HSA-2454192;R-HSA-2730833;R-HSA-2454239;R-HSA-2730870
R-HSA-2408522	Selenoamino acid metabolism	2	180	0.012613	0.999976	0.999976	3	33	0.00243058	9606	Homo sapiens	Rps16;Gsr		R-HSA-2408529;R-HSA-2408542;R-HSA-5333615
R-HSA-69242	S Phase	2	180	0.012613	0.999976	0.999976	1	54	0.00397731	9606	Homo sapiens	Apc2;Anapc10		R-HSA-69015
R-HSA-5619102	SLC transporter disorders	2	183	0.0128232	0.99998	0.99998	2	65	0.00478751	9606	Homo sapiens	Slc24a5;Slc17a8		R-HSA-5626356;R-HSA-5624256
R-HSA-9717189	Sensory perception of taste	1	147	0.0103006	0.99998	0.99998	2	25	0.00184135	9606	Homo sapiens	Itpr3		R-HSA-9717214;R-HSA-9717215
R-HSA-5663220	RHO GTPases Activate Formins	1	149	0.0104408	0.999983	0.999983	7	27	0.00198866	9606	Homo sapiens	Mal		R-HSA-5666001;R-HSA-5666049;R-HSA-5665982;R-HSA-5665998;R-HSA-5666046;R-HSA-5665999;R-HSA-5666008
R-HSA-1266738	Developmental Biology	57	1263	0.0885012	0.999987	0.999987	205	556	0.0409516	9606	Homo sapiens	Cacna1h;Rps16;Efna2;Cdsn;Nrp2;Trpc1;Sox9;Gfra1;Foxo3;Ngef;Wnt10b;Dsp;Cklf;Dag1;Hoxb4;Ank3;Evpl;Epha3;Plxna1;Dok2;Cdh15;Lama1;Perp;Tifa;Pkp2;Pkp1;Gata4;Pkp3;Pik3r1;Hist1h2ac;Myh14;Mafa;Map2k6;Pak3;Wnt4;Pak4;Pou5f1;Itga10;Ablim2;Tsc22d1;Krt17;Ablim3;Scn8a;Nrcam;Plxnc1;Smad2;Farp2;Hist1h4i;Adgrv1		R-HSA-525833;R-HSA-6806629;R-HSA-3928625;R-HSA-3928628;R-HSA-3928616;R-HSA-8942224;R-HSA-9634442;R-HSA-9692297;R-HSA-3928602;R-HSA-6805573;R-HSA-3928607;R-HSA-3928604;R-HSA-392751;R-HSA-3928597;R-HSA-447030;R-HSA-9010872;R-HSA-1112609;R-HSA-6806613;R-HSA-3928584;R-HSA-3928591;R-HSA-6806610;R-HSA-418865;R-HSA-399934;R-HSA-3928578;R-HSA-399935;R-HSA-399933;R-HSA-399930;R-HSA-6814298;R-HSA-399931;R-…
R-HSA-69481	G2/M Checkpoints	1	154	0.0107911	0.999988	0.999988	2	24	0.0017677	9606	Homo sapiens	Hist1h4i		R-HSA-5683735;R-HSA-69891
R-HSA-1483206	Glycerophospholipid biosynthesis	3	222	0.015556	0.999989	0.999989	7	133	0.00979598	9606	Homo sapiens	Pcyt1b;Mboat1;Mboat2		R-HSA-1482646;R-HSA-1482533;R-HSA-1482547;R-HSA-1482691;R-HSA-1482636;R-HSA-1482667;R-HSA-1483081
R-HSA-2467813	Separation of Sister Chromatids	2	195	0.0136641	0.999991	0.999991	3	8	0.000589232	9606	Homo sapiens	Apc2;Anapc10		R-HSA-174144;R-HSA-174202;R-HSA-174121
R-HSA-72203	Processing of Capped Intron-Containing Pre-mRNA	4	256	0.0179385	0.999992	0.999992	21	32	0.00235693	9606	Homo sapiens	Tifa;Pcbp3;Rbp1;Snrpf		R-HSA-72160;R-HSA-8849157;R-HSA-72130;R-HSA-72103;R-HSA-75079;R-HSA-75081;R-HSA-75080;R-HSA-72139;R-HSA-72107;R-HSA-75083;R-HSA-75082;R-HSA-72143;R-HSA-72180;R-HSA-156661;R-HSA-72185;R-HSA-75097;R-HSA-75096;R-HSA-75098;R-HSA-72124;R-HSA-72127;R-HSA-159101
R-HSA-73894	DNA Repair	9	380	0.0266274	0.999992	0.999992	93	337	0.0248214	9606	Homo sapiens	Hist1h2ac;Fancd2;Rad51b;Hist1h4i;Mgmt;Tdg;Parp2;Trf;Kdm4b		R-HSA-5684052;R-HSA-69891;R-HSA-110210;R-HSA-5686483;R-HSA-5649873;R-HSA-110219;R-HSA-5685341;R-HSA-110218;R-HSA-6786155;R-HSA-5683930;R-HSA-5649883;R-HSA-5687640;R-HSA-110350;R-HSA-5683801;R-HSA-5685318;R-HSA-6786166;R-HSA-5686469;R-HSA-5682629;R-HSA-5685838;R-HSA-9629195;R-HSA-110234;R-HSA-5683405;R-HSA-6786171;R-HSA-5651828;R-HSA-5690996;R-HSA-5686900;R-HSA-6785732;R-HSA-6785986;R-HSA-73892;R-…
R-HSA-8978868	Fatty acid metabolism	11	431	0.0302011	0.999994	0.999994	16	217	0.0159829	9606	Homo sapiens	Ptgis;Tbxas1;Abcd2;Cpt1a;Nudt19;Ppt2;Acot1;Cyp4b1;Slc27a3;Ggt1		R-HSA-2161792;R-HSA-8875077;R-HSA-211873;R-HSA-5690066;R-HSA-5690046;R-HSA-2161613;R-HSA-6810474;R-HSA-5690043;R-HSA-2161745;R-HSA-76496;R-HSA-2046093;R-HSA-76500;R-HSA-200406;R-HSA-2046087;R-HSA-266046;R-HSA-390393
R-HSA-5689880	Ub-specific processing proteases	2	206	0.0144349	0.999996	0.999996	3	40	0.00294616	9606	Homo sapiens	Hist1h2ac;Smad2		R-HSA-6781764;R-HSA-5690080;R-HSA-5690157
R-HSA-425407	SLC-mediated transmembrane transport	10	416	0.02915	0.999996	0.999996	9	191	0.0140679	9606	Homo sapiens	Slc22a15;Slc9a4;Slc5a6;Slc27a1;Nat2;Slc24a5;Slc17a8;Slc16a7;Slc7a1;Slc27a6		R-HSA-428052;R-HSA-352119;R-HSA-433698;R-HSA-375776;R-HSA-5626316;R-HSA-549297;R-HSA-429581;R-HSA-425994;R-HSA-879585
R-HSA-2262752	Cellular responses to stress	37	952	0.0667087	0.999997	0.999997	69	381	0.0280622	9606	Homo sapiens	Hist1h2ac;Rps16;Hsph1;Ncf1;Ncf4;Trf;Chac1;Creb3l2;Atp6v0e2;Map2k6;Kdm6b;Fkbp14;Cryba4;Tcirg1;Atp6v0c;Acp1;Hdac6;Pdia5;Apc2;Dcstamp;Gsr;Igfbp7;Atp6v0d2;Dnajb9;Ubxn6;Anapc10;Hist1h4i;Syvn1		R-HSA-3790137;R-HSA-71682;R-HSA-3228469;R-HSA-5324632;R-HSA-1791122;R-HSA-3790130;R-HSA-3788725;R-HSA-3788724;R-HSA-9645598;R-HSA-1791124;R-HSA-9640195;R-HSA-3229089;R-HSA-1368069;R-HSA-1791114;R-HSA-3223200;R-HSA-3371554;R-HSA-4793819;R-HSA-1368065;R-HSA-9653894;R-HSA-9653893;R-HSA-9646468;R-HSA-3788705;R-HSA-450333;R-HSA-3788708;R-HSA-3229102;R-HSA-1368119;R-HSA-3222546;R-HSA-3222533;R-HSA-5082…
R-HSA-9609646	HCMV Infection	4	270	0.0189195	0.999997	0.999997	8	31	0.00228327	9606	Homo sapiens	Hist1h2ac;Hist1h4i;Chmp4c		R-HSA-9614816;R-HSA-9621073;R-HSA-9698928;R-HSA-9614810;R-HSA-9610954;R-HSA-9614811;R-HSA-9623096;R-HSA-9610942
R-HSA-69275	G2/M Transition	2	212	0.0148553	0.999997	0.999997	13	78	0.00574501	9606	Homo sapiens	Ninl;Ppp1r12b		R-HSA-380455;R-HSA-380294;R-HSA-380303;R-HSA-8853419;R-HSA-3000319;R-HSA-380311;R-HSA-380272;R-HSA-3002811;R-HSA-2574845;R-HSA-8853405;R-HSA-3000310;R-HSA-380283;R-HSA-2574840
R-HSA-2871837	FCERI mediated NF-kB activation	1	175	0.0122626	0.999998	0.999998	1	19	0.00139943	9606	Homo sapiens	Ms4a2		R-HSA-2730882
R-HSA-453274	Mitotic G2-G2/M phases	2	214	0.0149954	0.999998	0.999998	13	80	0.00589232	9606	Homo sapiens	Ninl;Ppp1r12b		R-HSA-380455;R-HSA-380294;R-HSA-380303;R-HSA-8853419;R-HSA-3000319;R-HSA-380311;R-HSA-380272;R-HSA-3002811;R-HSA-2574845;R-HSA-8853405;R-HSA-3000310;R-HSA-380283;R-HSA-2574840
R-HSA-168273	Influenza Viral RNA Transcription and Replication	1	176	0.0123327	0.999998	0.999998	2	14	0.00103116	9606	Homo sapiens	Rps16		R-HSA-192704;R-HSA-192841
R-HSA-9609690	HCMV Early Events	2	215	0.0150655	0.999998	0.999998	5	12	0.000883848	9606	Homo sapiens	Hist1h2ac;Hist1h4i		R-HSA-9614816;R-HSA-9621073;R-HSA-9614810;R-HSA-9614811;R-HSA-9623096
R-HSA-8953897	Cellular responses to stimuli	37	970	0.06797	0.999998	0.999998	69	412	0.0303454	9606	Homo sapiens	Hist1h2ac;Rps16;Hsph1;Ncf1;Ncf4;Trf;Chac1;Creb3l2;Atp6v0e2;Map2k6;Kdm6b;Fkbp14;Cryba4;Tcirg1;Atp6v0c;Acp1;Hdac6;Pdia5;Apc2;Dcstamp;Gsr;Igfbp7;Atp6v0d2;Dnajb9;Ubxn6;Anapc10;Hist1h4i;Syvn1		R-HSA-3790137;R-HSA-71682;R-HSA-3228469;R-HSA-5324632;R-HSA-1791122;R-HSA-3790130;R-HSA-3788725;R-HSA-3788724;R-HSA-9645598;R-HSA-1791124;R-HSA-9640195;R-HSA-3229089;R-HSA-1368069;R-HSA-1791114;R-HSA-3223200;R-HSA-3371554;R-HSA-4793819;R-HSA-1368065;R-HSA-9653894;R-HSA-9653893;R-HSA-9646468;R-HSA-3788705;R-HSA-450333;R-HSA-3788708;R-HSA-3229102;R-HSA-1368119;R-HSA-3222546;R-HSA-3222533;R-HSA-5082…
R-HSA-6791226	Major pathway of rRNA processing in the nucleolus and cytosol	1	189	0.0132436	0.999999	0.999999	2	7	0.000515578	9606	Homo sapiens	Rps16		R-HSA-6791223;R-HSA-6791221
R-HSA-168255	Influenza Infection	1	200	0.0140144	1	1	2	59	0.00434558	9606	Homo sapiens	Rps16		R-HSA-192704;R-HSA-192841
R-HSA-68886	M Phase	8	416	0.02915	1	1	21	91	0.00670251	9606	Homo sapiens	Hist1h2ac;Apc2;Anapc10;Hist1h4i;Chmp4c;Vrk2;Ninl		R-HSA-2245218;R-HSA-174144;R-HSA-2288097;R-HSA-9668405;R-HSA-2993898;R-HSA-2172678;R-HSA-174121;R-HSA-2294600;R-HSA-9668415;R-HSA-2294574;R-HSA-2995389;R-HSA-9668419;R-HSA-2301205;R-HSA-9668389;R-HSA-2294580;R-HSA-174202;R-HSA-9668395;R-HSA-380316;R-HSA-380508;R-HSA-2294590;R-HSA-9668398
R-HSA-72766	Translation	5	339	0.0237545	1	1	40	99	0.00729174	9606	Homo sapiens	Wars;Rps16;Mrpl13;Eif4a2;Mrps36		R-HSA-5389842;R-HSA-5419281;R-HSA-1799326;R-HSA-72647;R-HSA-5368279;R-HSA-156808;R-HSA-5389848;R-HSA-5389849;R-HSA-379977;R-HSA-5419264;R-HSA-156823;R-HSA-5419271;R-HSA-157849;R-HSA-5419273;R-HSA-5419279;R-HSA-5389839;R-HSA-72671;R-HSA-5419277;R-HSA-72673;R-HSA-72672;R-HSA-72676;R-HSA-141671;R-HSA-156907;R-HSA-72619;R-HSA-141673;R-HSA-72621;R-HSA-5419261;R-HSA-156915;R-HSA-156912;R-HSA-72691;R-HS…
R-HSA-69620	Cell Cycle Checkpoints	3	280	0.0196202	1	1	3	56	0.00412462	9606	Homo sapiens	Apc2;Anapc10;Hist1h4i		R-HSA-5683735;R-HSA-69891;R-HSA-141423
R-HSA-8868773	rRNA processing in the nucleus and cytosol	1	207	0.0145049	1	1	2	15	0.00110481	9606	Homo sapiens	Rps16		R-HSA-6791223;R-HSA-6791221
R-HSA-162582	Signal Transduction	156	2997	0.210006	1	1	612	2454	0.180747	9606	Homo sapiens	Dhrs3;Adora2a;Ncf1;Kctd3;Gpr161;Cxcr1;Cxcr2;Ncf4;Erbb3;Ppp1r12b;Cyp26b1;Rgs2;Pnp;Pde6g;Wnt5b;Ccdc57;Pdk4;Sox9;Dgke;Wnt10b;Ngef;Cd86;Tle2;Esrp2;Cd80;Esrp1;Vrk2;Dkk2;Plxna1;Btc;Lama5;Lama1;44808;Mal;Pkp1;Pofut1;Ngfr;Rdh11;C5ar2;C5ar1;Aplnr;Myh14;Fpr2;Dtx4;Ccr10;Cpne8;Vipr2;Vipr1;Klc3;Elmo1;Id4;Tcirg1;Wnt2;S100a9;Pag1;Wnt4;Ccr1;Rtkn;Gngt2;Tfrc;Pmch;Fam83b;Mylk;Wnt2b;Smad2;Fer;Nphp4;Pde1a;Bcl2;Crabp1…		R-HSA-3769401;R-HSA-5654614;R-HSA-3858491;R-HSA-4649028;R-HSA-5654612;R-HSA-5668947;R-HSA-2187303;R-HSA-1562641;R-HSA-419841;R-HSA-3858482;R-HSA-5654622;R-HSA-3858480;R-HSA-5654620;R-HSA-392206;R-HSA-2187309;R-HSA-8981637;R-HSA-9014424;R-HSA-3858475;R-HSA-5668932;R-HSA-5654596;R-HSA-5654594;R-HSA-420883;R-HSA-9021596;R-HSA-5654592;R-HSA-1250315;R-HSA-8964241;R-HSA-9017488;R-HSA-373791;R-HSA-21873…
R-HSA-68877	Mitotic Prometaphase	1	211	0.0147852	1	1	2	20	0.00147308	9606	Homo sapiens	Ninl		R-HSA-380316;R-HSA-380508
R-HSA-5688426	Deubiquitination	3	289	0.0202509	1	1	7	77	0.00567136	9606	Homo sapiens	Hist1h2ac;Smad2;Tnip3		R-HSA-5690790;R-HSA-6781764;R-HSA-5691381;R-HSA-5691411;R-HSA-5690080;R-HSA-5690845;R-HSA-5690157
R-HSA-3700989	Transcriptional Regulation by TP53	9	487	0.0341251	1	1	12	259	0.0190764	9606	Homo sapiens	Fancd2;Dyrk3;Trp53inp1;Perp;Gsr;Map2k6		R-HSA-6798374;R-HSA-6797606;R-HSA-3215251;R-HSA-6798372;R-HSA-71682;R-HSA-6800836;R-HSA-6799409;R-HSA-6800816;R-HSA-6797712;R-HSA-6797616;R-HSA-8877691;R-HSA-6799416
R-HSA-72312	rRNA processing	1	245	0.0171677	1	1	2	21	0.00154673	9606	Homo sapiens	Rps16		R-HSA-6791223;R-HSA-6791221
R-HSA-69278	Cell Cycle, Mitotic	11	596	0.041763	1	1	70	350	0.0257789	9606	Homo sapiens	Hist1h2ac;Apc2;Ccnd2;Anapc10;Hist1h4i;Chmp4c;Vrk2;Ninl;Ppp1r12b;Cdkn1c		R-HSA-380294;R-HSA-8942607;R-HSA-174088;R-HSA-380303;R-HSA-2294574;R-HSA-2995389;R-HSA-174227;R-HSA-174224;R-HSA-380311;R-HSA-69015;R-HSA-3002811;R-HSA-2294580;R-HSA-380316;R-HSA-174104;R-HSA-8853405;R-HSA-174105;R-HSA-174238;R-HSA-188191;R-HSA-2294590;R-HSA-380455;R-HSA-174119;R-HSA-9668405;R-HSA-2172678;R-HSA-9018017;R-HSA-9686969;R-HSA-174120;R-HSA-174121;R-HSA-9668415;R-HSA-8853419;R-HSA-1742…
R-HSA-597592	Post-translational protein modification	59	1598	0.111975	1	1	82	526	0.038742	9606	Homo sapiens	Fbxl22;Ctsc;Amdhd2;B3gnt2;Mitf;Galnt2;Mgat3;Sec22c;Lypd3;Pigl;Derl1;Acp1;Camkmt;Rab31;Fcgr3;C1qtnf1;Dag1;Fbxo17;Ank3;Trim13;Igfbp7;Rab6b;F5;Kbtbd8;F9;Gan;Mal;Asb16;Hist1h2ac;Ttll7;Tnip3;Rab24;Ttll1;Xpnpep2;Cfp;Sec24d;Fam20c;Art3;Ttll10;Igfbp4;Adamts10;Sbspon;Tdg;Neu1;Ifngr1;Nae1;Spsb2;Ankrd9;Rab15;Thsd7a;Sparcl1;Rab8b;Smad2;Hist1h4i;Notum;Pcsk9;Syvn1		R-HSA-8956040;R-HSA-5694423;R-HSA-5694421;R-HSA-5694418;R-HSA-8853379;R-HSA-5173192;R-HSA-913675;R-HSA-5694417;R-HSA-5694431;R-HSA-8879117;R-HSA-5694428;R-HSA-5690845;R-HSA-5694425;R-HSA-159762;R-HSA-8955289;R-HSA-3232162;R-HSA-8879123;R-HSA-159771;R-HSA-5694413;R-HSA-3900070;R-HSA-5694409;R-HSA-8956200;R-HSA-8952618;R-HSA-6807877;R-HSA-6781764;R-HSA-5691381;R-HSA-8952620;R-HSA-6807875;R-HSA-8850…
R-HSA-556833	Metabolism of lipids	50	1444	0.101184	1	1	78	954	0.0702659	9606	Homo sapiens	Fdps;Hsd17b7;Slc27a1;Plin2;Cers6;Sec24d;Pcyt1b;Galc;Abcd2;Star;Neu1;Ccdc57;Ahrr;Cyp4b1;Ggt1;Tmem221;Ptpn13;Glipr1;Tbxas1;Cerk;Pi4k2b;Hexa;Plekha4;Nudt19;Acot1;Dhcr7;Lss;Ubxn6;Aacs;Stard4;Ptgis;Cpt1a;Bdh2;44808;Gdpd3;Rbp1;Ppt2;Fdxr;Pik3r6;Slc27a3;Mboat1;Mboat2;Pik3r1		R-HSA-1482646;R-HSA-1676185;R-HSA-1655834;R-HSA-194689;R-HSA-5690066;R-HSA-191366;R-HSA-2426147;R-HSA-1655825;R-HSA-1676048;R-HSA-1655824;R-HSA-1655827;R-HSA-6810474;R-HSA-1655828;R-HSA-2426155;R-HSA-2426154;R-HSA-1989772;R-HSA-2046093;R-HSA-1989770;R-HSA-1368065;R-HSA-1605632;R-HSA-2046087;R-HSA-1989764;R-HSA-1482636;R-HSA-196126;R-HSA-469659;R-HSA-193054;R-HSA-1675780;R-HSA-5696457;R-HSA-428185…
R-HSA-1640170	Cell Cycle	12	734	0.051433	1	1	111	449	0.0330706	9606	Homo sapiens	Hist1h2ac;Apc2;Ccnd2;Anapc10;Hist1h4i;Chmp4c;Trf;Vrk2;Ninl;Ppp1r12b;Cdkn1c		R-HSA-69891;R-HSA-174088;R-HSA-164617;R-HSA-2294574;R-HSA-164620;R-HSA-163090;R-HSA-912408;R-HSA-2294580;R-HSA-163099;R-HSA-174104;R-HSA-163096;R-HSA-8853405;R-HSA-174105;R-HSA-188191;R-HSA-2294590;R-HSA-380455;R-HSA-174119;R-HSA-2172678;R-HSA-9018017;R-HSA-9686969;R-HSA-174120;R-HSA-174121;R-HSA-8853419;R-HSA-163120;R-HSA-174132;R-HSA-2301205;R-HSA-174139;R-HSA-176702;R-HSA-176700;R-HSA-2245218;…
R-HSA-5663205	Infectious disease	39	1357	0.0950879	1	1	70	752	0.0553878	9606	Homo sapiens	Hist1h2ac;Adora2a;Rps16;Fxyd3;Atp1a3;Dock2;Map2k6;Vipr2;Gpr25;Vipr1;Sv2c;Ptger2;Itga4;Star;Chmp4c;Ifngr1;Elmo1;Adcy2;Ccr5;Ggt1;Pthlh;Ap1m2;Pycard;Gngt2;Fcgr3;Sh3gl3;Syk;Atp1b2;Ap1s2;Mefv;Ptgir;Hist1h4i;44808;Rbp1;Tlr7;Itpr3		R-HSA-9664275;R-HSA-9660819;R-HSA-9664273;R-HSA-9664278;R-HSA-9664406;R-HSA-182279;R-HSA-9666458;R-HSA-9660824;R-HSA-3159227;R-HSA-182286;R-HSA-9660828;R-HSA-9666435;R-HSA-5250880;R-HSA-5250884;R-HSA-9664261;R-HSA-164500;R-HSA-9687435;R-HSA-164507;R-HSA-9664271;R-HSA-9664270;R-HSA-164508;R-HSA-9664268;R-HSA-9664306;R-HSA-164515;R-HSA-163617;R-HSA-9679029;R-HSA-9623096;R-HSA-164521;R-HSA-8936356;R…
R-HSA-212436	Generic Transcription Pathway	48	1555	0.108962	1	1	245	830	0.0611328	9606	Homo sapiens	Hist1h2ac;Wwox;Zfp69;Kctd1;Map2k6;Zfp493;Ctgf;Uxt;Zfp712;Itga4;Setd1a;Sox9;Hdac6;Foxo3;Twist2;Runx2;Nfe2;Apc2;Ccnd2;Fancd2;Gsr;Ubxn6;Smad2;Anapc10;Dyrk3;Trp53inp1;Zfp703;Hist1h4i;44808;Perp;Zfp446;Notch3;Smarca2;Gata4;Zfp61;Foxp3;Zfp707		R-HSA-8936584;R-HSA-8937097;R-HSA-8985227;R-HSA-71682;R-HSA-2187303;R-HSA-9007759;R-HSA-9625749;R-HSA-9623192;R-HSA-9009282;R-HSA-2187309;R-HSA-8877192;R-HSA-8937113;R-HSA-9623168;R-HSA-9009309;R-HSA-9009308;R-HSA-8937118;R-HSA-8865425;R-HSA-9622667;R-HSA-8939667;R-HSA-2187325;R-HSA-9622668;R-HSA-8939670;R-HSA-8936599;R-HSA-8936616;R-HSA-8939688;R-HSA-8936621;R-HSA-8936608;R-HSA-8939706;R-HSA-898…
R-HSA-71291	Metabolism of amino acids and derivatives	8	665	0.046598	1	1	10	285	0.0209914	9606	Homo sapiens	Rps16;Tst;Hdc;Gsr;Dio2;Chdh;Suox;Glul		R-HSA-1614618;R-HSA-2408529;R-HSA-9013198;R-HSA-1614544;R-HSA-2408542;R-HSA-977301;R-HSA-5333615;R-HSA-6797961;R-HSA-70606;R-HSA-209772
R-HSA-73857	RNA Polymerase II Transcription	52	1694	0.118702	1	1	253	891	0.0656257	9606	Homo sapiens	Hist1h2ac;Wwox;Zfp69;Kctd1;Snrpf;Map2k6;Zfp493;Uxt;Ctgf;Zfp712;Itga4;Setd1a;Sox9;Hdac6;Foxo3;Twist2;Runx2;Nfe2;Apc2;Ccnd2;Fancd2;Gsr;Ell3;Ubxn6;Smad2;Anapc10;Dyrk3;Trp53inp1;Zfp703;Hist1h4i;44808;Perp;Zfp446;Tifa;Rbp1;Notch3;Smarca2;Gata4;Zfp61;Foxp3;Zfp707		R-HSA-8936584;R-HSA-8937097;R-HSA-8985227;R-HSA-71682;R-HSA-2187303;R-HSA-9007759;R-HSA-9625749;R-HSA-9623192;R-HSA-9009282;R-HSA-2187309;R-HSA-8877192;R-HSA-8937113;R-HSA-9623168;R-HSA-9009309;R-HSA-9009308;R-HSA-8937118;R-HSA-8865425;R-HSA-9622667;R-HSA-8939667;R-HSA-2187325;R-HSA-9622668;R-HSA-8939670;R-HSA-8936599;R-HSA-8936616;R-HSA-8939688;R-HSA-8936621;R-HSA-8936608;R-HSA-8939706;R-HSA-898…
R-HSA-1643685	Disease	90	2431	0.170345	1	1	208	1632	0.120203	9606	Homo sapiens	Hip1;Adora2a;Rps16;Opn1sw;Erbb3;Cyp26b1;Gpr25;Sv2c;Abcb6;Csf2rb;Ptger2;Derl3;Rac2;Adcy2;Derl1;Ggt1;Ccr5;Hdac6;Foxo3;Cd86;Apc2;Tbxas1;Fcgr3;Syk;Sh3gl3;Ap1s2;Cd80;Esrp1;Dag1;Mefv;Dkk2;Btc;Ptgir;F9;Anapc10;Wdcp;44808;Rbp1;Notch3;Mal;Tlr7;Slc24a5;Pik3r1;Hist1h2ac;Rad51b;Fxyd3;Rdh11;Mmab;Unc93b1;Atp1a3;Cfp;Dock2;Map2k6;Vipr2;Vipr1;Abcd2;Epgn;Itga4;Star;Adamts10;Sbspon;Chmp4c;Elmo1;Neu1;Ifngr1;Pthlh;Sl…		R-HSA-182279;R-HSA-2466861;R-HSA-9664664;R-HSA-182286;R-HSA-9668253;R-HSA-3656230;R-HSA-5688899;R-HSA-9664646;R-HSA-1839114;R-HSA-5096538;R-HSA-8870558;R-HSA-5602383;R-HSA-1839107;R-HSA-9035949;R-HSA-9679029;R-HSA-9035950;R-HSA-5387386;R-HSA-9610942;R-HSA-5387389;R-HSA-9665699;R-HSA-9665697;R-HSA-9665701;R-HSA-9665700;R-HSA-2466834;R-HSA-9035966;R-HSA-9665705;R-HSA-9665709;R-HSA-9035976;R-HSA-903…
R-HSA-392499	Metabolism of proteins	76	2205	0.154509	1	1	141	798	0.0587759	9606	Homo sapiens	Fbxl22;Ctsc;Adora2a;Rps16;Ctsd;Wars;Mrpl13;Amdhd2;B3gnt2;Mitf;Galnt2;Mgat3;Mrps36;Sec22c;Csf2rb;Lypd3;Pigl;Derl1;Acp1;Camkmt;Rab31;Fcgr3;C1qtnf1;Dag1;Fbxo17;Ank3;Trim13;Igfbp7;Rab6b;F5;Kbtbd8;F9;Tst;44808;Gan;Mal;Gata4;Asb16;Hist1h2ac;Ttll7;Tnip3;Rab24;Ttll1;Xpnpep2;Cfp;Sec24d;Fam20c;Art3;Ttll10;Igfbp4;Adamts10;P2ry2;Sbspon;Tdg;Neu1;Ifngr1;Cma1;Nae1;Spsb2;Ankrd9;Gngt2;Rab15;Thsd7a;Sparcl1;Rab8b;S…		R-HSA-8956040;R-HSA-5686359;R-HSA-8853379;R-HSA-913675;R-HSA-8850560;R-HSA-159762;R-HSA-8955289;R-HSA-2022412;R-HSA-2028294;R-HSA-159771;R-HSA-2022403;R-HSA-6807877;R-HSA-6781764;R-HSA-6807875;R-HSA-8850594;R-HSA-5684862;R-HSA-6803789;R-HSA-162857;R-HSA-4570485;R-HSA-159795;R-HSA-159796;R-HSA-975926;R-HSA-159803;R-HSA-4084999;R-HSA-5615637;R-HSA-5389842;R-HSA-5173005;R-HSA-5419281;R-HSA-390470;R-…
R-HSA-74160	Gene expression (Transcription)	57	1855	0.129984	1	1	295	1006	0.0740959	9606	Homo sapiens	Hist1h2ac;Wwox;Taf1d;Zfp69;Kctd1;Phf1;Snrpf;Map2k6;Zfp493;Uxt;Ctgf;Zfp712;Itga4;Setd1a;Tdg;Sox9;Hdac6;Foxo3;Twist2;Runx2;Nfe2;Apc2;Ccnd2;Fancd2;Bcdin3d;Gsr;Ell3;Ubxn6;Piwil4;Smad2;Anapc10;Dyrk3;Trp53inp1;Zfp703;Hist1h4i;44808;Perp;Zfp446;Tifa;Rbp1;Notch3;Smarca2;Gata4;Zfp61;Foxp3;Zfp707		R-HSA-73729;R-HSA-8936584;R-HSA-5334097;R-HSA-8937097;R-HSA-427527;R-HSA-5334099;R-HSA-8985227;R-HSA-71682;R-HSA-2187303;R-HSA-9007759;R-HSA-9625749;R-HSA-73736;R-HSA-73739;R-HSA-9623192;R-HSA-9009282;R-HSA-2187309;R-HSA-5601883;R-HSA-433672;R-HSA-427528;R-HSA-8877192;R-HSA-5220959;R-HSA-8937113;R-HSA-9623168;R-HSA-9009309;R-HSA-9009308;R-HSA-8937118;R-HSA-8865425;R-HSA-9622667;R-HSA-8939667;R-HS…
R-HSA-8953854	Metabolism of RNA	8	783	0.0548665	1	1	43	187	0.0137733	9606	Homo sapiens	Rps16;Tst;Eif4a2;Tifa;Pcbp3;Rbp1;Snrpf;Enpp2		R-HSA-8849157;R-HSA-430021;R-HSA-72130;R-HSA-429955;R-HSA-75079;R-HSA-8941312;R-HSA-75081;R-HSA-75080;R-HSA-72139;R-HSA-430028;R-HSA-75083;R-HSA-927813;R-HSA-75082;R-HSA-111437;R-HSA-72143;R-HSA-111438;R-HSA-6791223;R-HSA-77585;R-HSA-191763;R-HSA-927836;R-HSA-6791221;R-HSA-77586;R-HSA-191830;R-HSA-927832;R-HSA-75097;R-HSA-75096;R-HSA-75098;R-HSA-927889;R-HSA-72160;R-HSA-927789;R-HSA-450595;R-HSA-…
R-HSA-1430728	Metabolism	125	3646	0.255483	1	1	236	2260	0.166458	9606	Homo sapiens	Rps16;Gda;Gnpda2;Ip6k3;Pcyt1b;Cyp26b1;Pnp;Ccdc57;Pdk4;Csgalnact1;Entpd7;Nt5m;Ggt1;Tmem221;Tymp;Cerk;Slc37a2;Slc37a1;Dio2;44808;Rbp1;Mal;Pkp1;Ldlr;Mboat1;Mboat2;Fdps;Hsd17b7;Rdh11;Chac1;Fut1;Fut7;Star;Neu1;Cyp4b1;Hpse;Slc5a6;Gngt2;Pi4k2b;Sult1a1;Cryl1;Dhcr7;Dctd;Stard4;Tcn2;Cmbl;Nat2;Ephx1;Ppt2;Fdxr;Slc27a3;Itpr3;Glul;Oplah;Mthfd1l;Acy3;Slc27a1;B3gnt2;Plin2;Cers6;Acp5;Adcy2;Glipr1;Apc2;Tbxas1;Plek…		R-HSA-1655834;R-HSA-71682;R-HSA-74242;R-HSA-176646;R-HSA-1655825;R-HSA-74249;R-HSA-1655824;R-HSA-1655827;R-HSA-9638046;R-HSA-1655828;R-HSA-74255;R-HSA-2162225;R-HSA-211991;R-HSA-1368065;R-HSA-211988;R-HSA-1605632;R-HSA-164377;R-HSA-196126;R-HSA-193054;R-HSA-1675780;R-HSA-176669;R-HSA-199202;R-HSA-212007;R-HSA-199206;R-HSA-212005;R-HSA-8943279;R-HSA-212004;R-HSA-170026;R-HSA-193064;R-HSA-193065;R-…
